# Supplementary material for: Synthesis and metalation of polycatechol nanohoops derived from fluorocycloparaphenylenes
Source: Royal Society of Chemistry journal article supplement (doi:10.1039/d3sc03561a), 2023-01-01
Supplement: d3sc03561a1.pdf [file d3sc03561a1.pdf]

Supporting Information for

**Synthesis and metalation of polycatechol nano hoops derived from  
fluorocycloparaphenylenes**

Ashlyn A. Kamin,<sup>1</sup> Tara D. Clayton,<sup>2</sup> Claire E. Otteson,<sup>2</sup> Paige M. Gannon,<sup>1</sup> Sebastian  
Krajewski,<sup>1</sup> Werner Kaminsky,<sup>1</sup> Ramesh Jasti,<sup>2</sup> Dianne J. Xiao.<sup>1,\*</sup>

<sup>1</sup>Department of Chemistry, University of Washington, Seattle, Washington 98195, United States

<sup>2</sup>Department of Chemistry and Biochemistry, Materials Science Institute, and Knight Campus for  
Accelerating Scientific Impact, University of Oregon, Eugene, Oregon 97403, United States

\*Correspondence to: [djxiao@uw.edu](mailto:djxiao@uw.edu)

**Table of Contents**

|                                                  |    |
|--------------------------------------------------|----|
| 1. General Materials and Methods: .....          | 2  |
| 2. Synthetic Procedures: .....                   | 3  |
| 3. Single Crystal X-Ray Diffraction .....        | 11 |
| 4. Computational .....                           | 13 |
| 5. Supplementary Figures: .....                  | 15 |
| 6. Supplementary DFT Optimized Geometries: ..... | 47 |
| 7. Supplementary Crystallographic Data: .....    | 61 |
| 8. References: .....                             | 69 |

## 1. General Materials and Methods:

Reagents and solvents were purchased from commercial vendors (Millipore Sigma, TCI America, Alfa Aesar, Fisher Scientific, Oakwood Chemical, Combi-Blocks) and used without further purification unless otherwise noted. Deuterated solvents were purchased from Cambridge Isotope Laboratories. Oxygen- and moisture-sensitive reactions were performed using standard Schlenk or glovebox procedures under a nitrogen atmosphere. Workups were performed in air unless otherwise specified.

Silica column chromatography was conducted with Zeochem Zeoprep n60 Eco 40-63  $\mu\text{m}$  silica gel. Alumina column chromatography was conducted with SorbTech basic alumina (pH 10), Act. II-III, 50-200  $\mu\text{m}$ . Preparative TLC was performed using Millipore Sigma 200  $\mu\text{m}$  silica gel 60 matrix F<sub>254</sub> TLC plates.

NMR spectra were acquired using 500 MHz Bruker spectrometers. <sup>1</sup>H spectra were referenced to TMS ( $\delta$  0.00 ppm) or residual solvent peaks (CDCl<sub>3</sub>  $\delta$  7.26 ppm, DMSO-*d*<sub>6</sub>  $\delta$  2.50 ppm, and tetrachloroethane-*d*<sub>2</sub>  $\delta$  6.00 ppm). <sup>13</sup>C NMR spectra were referenced to residual CDCl<sub>3</sub> ( $\delta$  77.16 ppm). <sup>19</sup>F NMR spectra were indirectly referenced to CFCl<sub>3</sub> ( $\delta$  0.00 ppm) using a hexafluorobenzene standard ( $\delta$  -164.9 ppm) or via the Bruker TopSpin 3.5 software suite.

Solution-phase UV-vis spectra were collected on an Agilent Cary 100 UV-vis or Shimadzu UV-3600i Plus UV-vis-NIR spectrophotometer using a 1 cm quartz cuvette.

Standard ESI-MS data were collected on a Bruker Esquire Ion Trap mass spectrometer in positive ion mode. GC-MS data were collected on an Agilent 9573 mass spectrometer in positive ion mode.

High-resolution ESI-MS data for **4MeO-CPP**, **12MeO-CPP**, **12iPrS-CPP**, **12HO-CPP**, **Ru<sub>2</sub>(Ph<sub>2</sub>dhbq)**, and **Ru<sub>2</sub>(4O-CPP)** were collected on an LTQ-Orbitrap XL mass spectrometer in positive ion mode. High-resolution ESI-MS data for **4HO-CPP** was collected on the same instrument in negative ion mode.

High-resolution MALDI-TOF data for **4F-MC-OTES** and **4F-CPP** were collected on a Bruker Autoflex Speed LRF mass spectrometer in positive ion mode. High resolution MALDI-TOF data for **Ru<sub>2</sub>(4O-CPP)** and **Ru<sub>6</sub>(12O-CPP)** were collected on a Waters Synapt XS mass spectrometer in positive ion mode. All samples were prepared in DCM with *trans*-2-[3-(4-*tert*-butylphenyl)-2-methyl-2-propenylidene]malononitrile (DCTB) as a matrix.

## 2. Synthetic Procedures:

The starting material, **12F-CPP**, was prepared according to published methods by Jasti and coworkers.<sup>1,2</sup> The intermediates, **S1** and **S2**, used in the preparation of **4F-CPP** were prepared according to previously published methods by Jasti and coworkers.<sup>2,3</sup> The terphenyl model ligand, **H4Ph2dhbq**, was prepared according to published methods by Xiao and coworkers.<sup>4</sup>

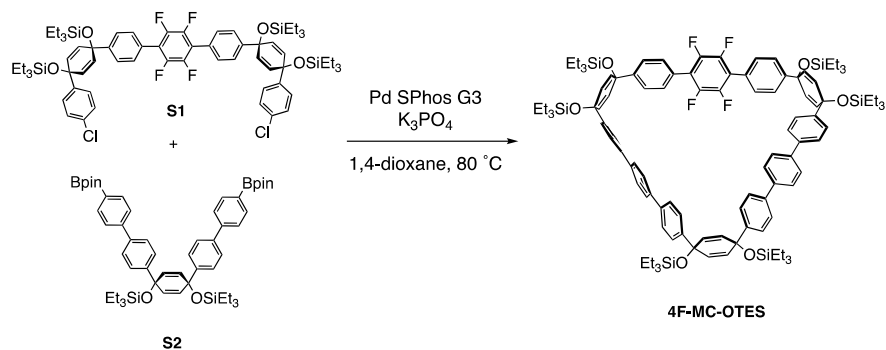

**Synthesis of 4F-MC-OTES.** To a flame-dried 1 L round-bottom flask equipped with a stir bar was added **S1** (0.6 g, 0.5 mmol, 1.0 equiv), **S2** (0.493 g, 0.55 mmol, 1.1 equiv), and Pd SPhos G3 (78 mg, 0.1 mmol, 0.2 equiv). The flask was placed under high vac for one hour, and subsequently evacuated and backfilled with nitrogen three times. Starting materials were dissolved in 1,4-dioxane (333 mL) and the mixture was sparged with nitrogen for 30 minutes. The mixture was then lowered into a preheated oil bath at 80 °C and allowed to stir for 30 minutes. A 2M aqueous solution of K<sub>3</sub>PO<sub>4</sub> (33 mL) that had been sparged for 30 minutes prior was added dropwise. The solution was allowed to stir at 80 °C overnight. In the morning, the solution was cooled to room temperature, poured over a fritted funnel filled with celite and sodium sulfate, and eluted with ethyl acetate. The eluent was collected, and the solvent was removed *via* rotary evaporation. The resulting brown oil was extracted with ethyl acetate (3 × 100 mL), washed with water (3 × 100 mL), brine (1 × 100 mL), and finally dried over sodium sulfate. After removal of sodium sulfate and solvent, the crude oil was dissolved in DCM, adsorbed onto silica, and purified via silica column chromatography from 0-100% DCM in hexanes. Concentration of fractions afforded **4F-MC-OTES** as an off-white solid (0.28 g, 31%).

<sup>1</sup>H NMR (500 MHz, CDCl<sub>3</sub>) δ 7.67 (s, 8H), 7.58 (d, *J* = 8.4 Hz, 8H), 7.52 (d, *J* = 8.5 Hz, 4H), 7.49–7.41 (m, 12H), 6.09 (d, *J* = 10.2 Hz, 4H), 6.06–6.01 (m, 8H), 0.97 (td, *J* = 7.9, 3.8 Hz, 54H), 0.70–0.62 (m, 36H). <sup>13</sup>C{<sup>1</sup>H} NMR (126 MHz, CDCl<sub>3</sub>) δ 139.66, 131.89, 130.13, 127.48, 126.86, 126.83, 126.52, 126.25, 7.24, 7.22, 7.21, 6.66, 6.62. <sup>19</sup>F NMR (471 MHz, CDCl<sub>3</sub>) δ –144.37 (s). HRMS (MALDI) *m/z*: [M]<sup>+</sup> calculated for C<sub>108</sub>H<sub>134</sub>F<sub>4</sub>O<sub>6</sub>Si<sub>6</sub>, 1770.8732; found, 1770.8672.





filled glovebox. Additional H<sub>2</sub>O (30 mL) was added, and the mixture was extracted with DCM (3 × 5 mL). The combined organic layers were reduced *in vacuo*, and the resulting solid was washed with pentane to yield **4HO-CPP** as a light yellow/brown solid (13.6 mg, 91%).

<sup>1</sup>H NMR (500 MHz, CDCl<sub>3</sub>) δ 7.69–7.54 (m, 44H). <sup>13</sup>C NMR (126 MHz, CDCl<sub>3</sub>) δ 197.23, 193.76, 154.32, 141.95, 140.99, 139.60, 139.46, 139.27, 139.14, 138.97, 138.90, 138.74, 138.64, 138.61, 138.59, 138.49, 138.40, 138.32, 132.07, 131.23, 128.84, 127.81, 127.77, 127.69, 127.63, 127.58, 127.54, 127.50, 127.48, 127.40, 127.38, 127.31, 126.93, 122.20. HRMS (ESI) *m/z*: found 975.3471 ([M-H]<sup>-</sup>, calc'd: 975.3469 for C<sub>72</sub>H<sub>47</sub>O<sub>4</sub>).

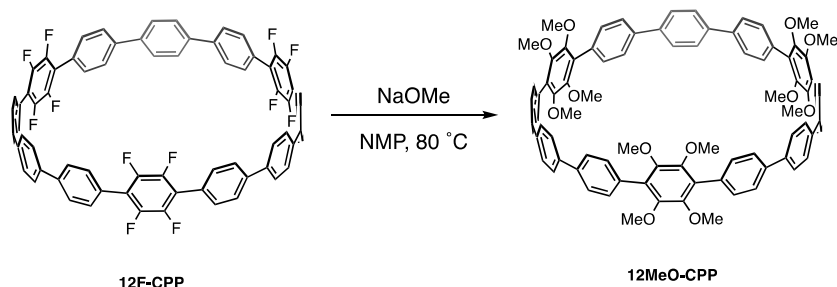

**Synthesis of 12MeO-CPP.** In a nitrogen-filled glovebox, **12F-CPP** (99.6 mg, 88.2 μmol), sodium methoxide (229 mg, 4.25 mmol, 48 equiv), and NMP (4 mL) were divided evenly between four, 4 mL scintillation vials. All vials were sealed and stirred at 80 °C for 16 hr. The contents of all vials were combined. The mixture was removed from the glovebox and diluted with H<sub>2</sub>O (~20 mL). Aqueous 1M HCl (~10 mL) was added, and the solution was verified to be acidic by pH paper. The mixture was then extracted with ethyl acetate (4 × 25 mL). The combined organic layers were washed with H<sub>2</sub>O (4 × 30 mL), dried over magnesium sulfate, gravity filtered, and the solvent was removed *in vacuo*. The resulting solid was suspended in minimal cold MeOH, collected via vacuum filtration, and dried *in vacuo* to yield **12MeO-CPP** as an off-white solid (109 mg, 97%). Crystals suitable for X-ray diffraction were grown by slow evaporation out of an acetone/MeOH mixture.

Note: A small degree of premature demethylation may be observed in as-synthesized **12MeO-CPP**. While this is not of concern given our fully demethylated synthetic target, we found that any demethylation could be reversed using the following general procedure. Following heating, the vial(s) were removed from the glovebox, cooled to 0 °C, uncapped briefly, and methyl iodide (68 equiv) was added. Once resealed, the vial(s) were stirred at room temperature overnight. The resulting mixture was worked up as previously described, omitting the acidification step, to yield pure **12MeO-CPP** as an off-white solid in 86% yield.

<sup>1</sup>H NMR (500 MHz, CDCl<sub>3</sub>) δ 7.66 (s, 12H), 7.59 (d, *J* = 8.7 Hz, 12H), 7.49 (d, *J* = 8.7 Hz, 12H), 3.53 (s, 36H). <sup>13</sup>C{<sup>1</sup>H} NMR (126 MHz, CDCl<sub>3</sub>) δ 147.35, 139.25, 139.19, 132.52, 131.36, 128.77, 127.61, 126.25, 61.07. HRMS (ESI) *m/z*: found 1273.5077 ([M+H]<sup>+</sup>, calc'd: 1273.5097 for C<sub>84</sub>H<sub>72</sub>O<sub>12</sub>H).

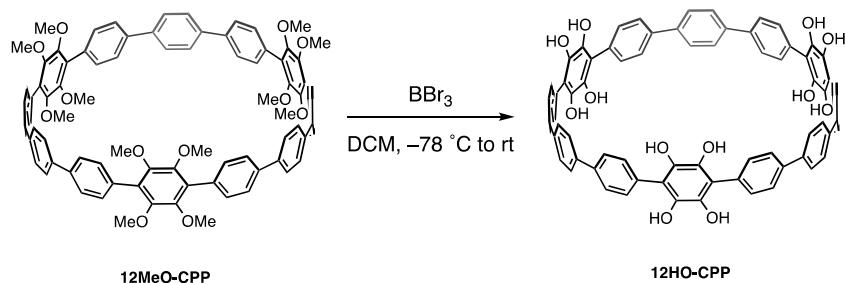

**Synthesis of 12HO-CPP.** In a Schlenk flask under a nitrogen atmosphere, **12MeO-CPP** (109 mg, 85.4  $\mu\text{mol}$ ) was dissolved in DCM (degassed/anhydrous, from the glovebox; 14 mL). The solution was cooled to  $-78^\circ\text{C}$ . A 1M solution of  $\text{BBr}_3$  in DCM (2.05 mL, 2.05 mmol, 24 equiv) was added dropwise via syringe. The reaction was allowed to return to room temperature over the course of 2-3 hr and stirred overnight without heating. The reaction was cooled to  $0^\circ\text{C}$ , quenched carefully by dropwise addition of  $\text{H}_2\text{O}$  (degassed;  $\sim 55$  mL), and stirred for 2 hr. Without exposing the mixture to air, the DCM was removed *in vacuo* and the flask was transferred to a nitrogen-filled glovebox. The precipitate in the flask was recovered by vacuum filtration, washed with  $\text{H}_2\text{O}$ , washed with a minimal amount of MeOH, and dried *in vacuo* to yield **12HO-CPP** as an off-white/brown solid (64.9 mg, 69%).

Note: workups conducted in air resulted in uncontrolled oxidation of the catechol units, as observed by significant peak broadening in the  $^1\text{H}$  NMR; this oxidation could be partially reversed through reaction with sodium dithionite, however the peaks were significantly less well resolved than for **12HO-CPP** worked up under a nitrogen atmosphere ([Fig. S14](#)).

$^1\text{H}$  NMR (500 MHz,  $\text{DMSO}-d_6$ )  $\delta$  7.80 (br), 7.70 (br), 7.58 (br). HRMS (ESI)  $m/z$ : found 1143.2779 ( $[\text{M}+\text{K}]^+$ , calc'd: 1143.2777 for  $\text{C}_{72}\text{H}_{48}\text{O}_{12}\text{K}$ ).  $^{13}\text{C}$  NMR could not be obtained due to poor solubility.

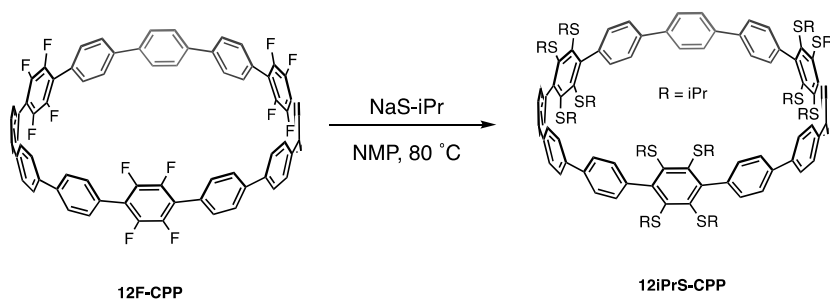

**Synthesis of 12iPrS-CPP.** An oven-dried Schlenk flask under a nitrogen atmosphere was charged with **12F-CPP** (20.0 mg, 17.7  $\mu\text{mol}$ ) and NMP (anhydrous/degassed, from the glovebox; 1.5 mL). Under nitrogen, sodium 2-propanethiolate (68.2 mg, 695  $\mu\text{mol}$ , 39 equiv) was added and the reaction was stirred at  $80^\circ\text{C}$  for 12 hr. The reaction was diluted with  $\text{H}_2\text{O}$  (25 mL) and the resulting thiol byproducts were removed *in vacuo*. Additional  $\text{H}_2\text{O}$  (75 mL) was added, and the mixture was extracted with DCM ( $3 \times 20$  mL) followed by ethyl acetate ( $3 \times 20$  mL). The combined DCM layers were washed with  $\text{H}_2\text{O}$  ( $5 \times 10$  mL) and dried over magnesium sulfate. The DCM and ethyl

acetate layers were combined, and the solvent was removed *in vacuo* to yield an oily solid. The solid was suspended in MeOH, filtered, and washed with additional MeOH (~40 mL total) to yield **12iPrS-CPP** as a yellow solid (27.3 mg, 86%). Single crystals could be obtained by slow evaporation out DMSO or a DCM/MeOH mixture, however these crystals were not of suitable quality for X-ray diffraction.

$^1\text{H}$  NMR (500 MHz,  $\text{CDCl}_3$ )  $\delta$  7.56 (s, 12H), 7.41 (d,  $J = 8.1$  Hz, 12H), 7.36 (d,  $J = 8.2$  Hz, 12H), 3.13 (hept,  $J = 6.7$  Hz, 12H), 1.00 (d,  $J = 6.7$  Hz, 72H).  $^{13}\text{C}\{^1\text{H}\}$  NMR (126 MHz,  $\text{CDCl}_3$ )  $\delta$  149.82, 140.80, 140.58, 140.37, 140.20, 132.51, 128.22, 126.34, 40.24, 22.81, 1.11. HRMS (ESI)  $m/z$ : found 1801.6088 ( $[\text{M}+\text{H}]^+$  calc'd: 1801.6111 for  $\text{C}_{108}\text{H}_{120}\text{S}_{12}\text{H}$ ).

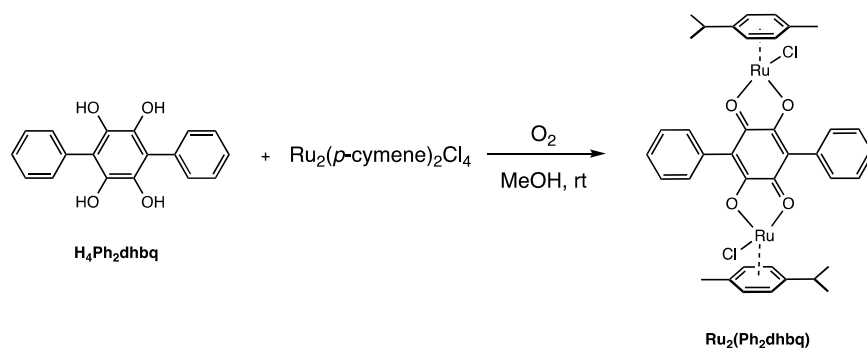

**Synthesis of  $\text{Ru}_2(\text{Ph}_2\text{dhbq})$ .** This compound was prepared using a modified procedure from the literature.<sup>5</sup> In a nitrogen-filled glovebox, a 20 mL scintillation vial was charged with  **$\text{H}_4\text{Ph}_2\text{dhbq}$**  (45.0 mg, 0.153 mmol),  $[\text{Ru}(p\text{-cymene})\text{Cl}_2]_2$  (95.7 mg, 0.156 mmol, 1 equiv), and MeOH (13 mL). The vial was capped, stirred at room temperature for 10 min, and then removed from the glovebox. The vial was uncapped, and the mixture was stirred while open to air for two days. The resulting dark precipitate was collected by centrifugation and washed with MeOH ( $3 \times 30$  mL), diethyl ether (30 mL), and dried *in vacuo* to yield  **$\text{Ru}_2(\text{Ph}_2\text{dhbq})$**  as a black solid (89.8 mg, 0.108 mmol, 71%). Slow diffusion of MeOH into DCM gave single crystals suitable for X-ray diffraction.

$^1\text{H}$  NMR and standard ESI-MS data match the previously reported data for this compound. HRMS (ESI)  $m/z$ : found 796.0560 ( $[\text{M}-\text{Cl}]^+$  calc'd: 796.0564 for  $\text{C}_{38}\text{H}_{38}\text{O}_4\text{ClRu}_2$ ).

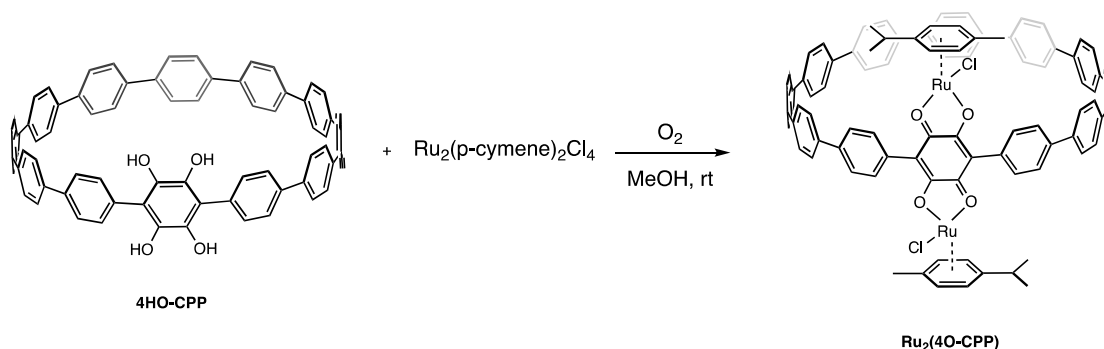

**Synthesis of  $\text{Ru}_2(4\text{O-CPP})$ .** In a nitrogen-filled glovebox, a 4 mL scintillation vial was charged with **4HO-CPP** (2.8 mg, 2.9  $\mu\text{mol}$ ) and MeOH (0.5 mL). While stirring, a solution of  $[\text{Ru}(p\text{-}$



cymene)Cl<sub>2</sub>]<sub>2</sub> (4.0 mg, 6.5 μmol, 2.2 equiv) in MeOH (0.5 mL) was added dropwise. The vial was capped, stirred at room temperature for 10 min, and then removed from the glovebox. The vial lid was unscrewed by one-quarter turn to facilitate the slow diffusion of oxygen into the vial, and the mixture was stirred at room temperature for five days. The resulting dark precipitate was collected by filtration and washed with MeOH (2 × 1 mL). The precipitate was recovered using CHCl<sub>3</sub> and purified by preparative TLC (DCM eluent; TLC plates were pre-treated with 4% NEt<sub>3</sub> in DCM) to yield **Ru<sub>2</sub>(4O-CPP)** as a dark red solid (0.8 mg, 19%).

Note: due to potential sensitivity of the product to acid, chlorinated solvents were stored over potassium carbonate prior to use.

<sup>1</sup>H NMR (500 MHz, CDCl<sub>3</sub>) δ 7.79 (d, *J* = 8.5 Hz, 4H), 7.66–7.57 (m, 36H), 7.50 (d, *J* = 8.5 Hz, 4H), 5.58 (d, *J* = 6.0 Hz, 4H), 5.28 (d, *J* = 5.9 Hz, 4H), 2.89 (hept, 2H), 2.21 (s, 6H), 1.36 (d, *J* = 6.9 Hz, 12H). HRMS (ESI) *m/z*: found 1479.3190 ([M–Cl]<sup>+</sup> calc'd: 1479.3236 for C<sub>92</sub>H<sub>72</sub>O<sub>4</sub>ClRu<sub>2</sub>). HRMS (MALDI) *m/z*: found 1514.2805 ([M]<sup>+</sup> calc'd: 1514.2925 for C<sub>92</sub>H<sub>72</sub>O<sub>4</sub>Cl<sub>2</sub>Ru<sub>2</sub>).

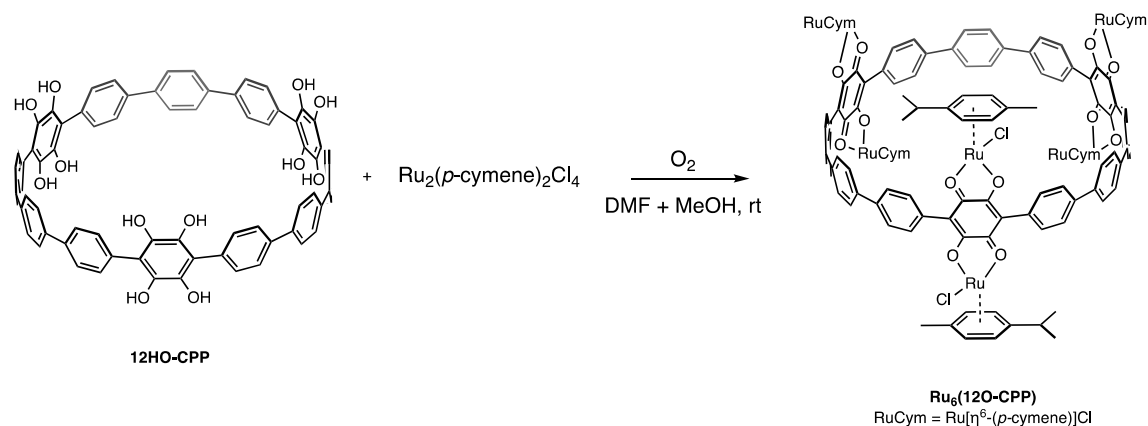

**Synthesis of Ru<sub>6</sub>(12O-CPP).** In a nitrogen-filled glovebox, a 4 mL scintillation vial was charged with **12HO-CPP** (2.5 mg, 2.3 μmol) and DMF (0.5 mL). While stirring, a solution of [Ru(*p*-cymene)Cl<sub>2</sub>]<sub>2</sub> (12.1 mg, 19.7 μmol, 8.6 equiv) in MeOH (0.5 mL) was added dropwise. The vial was capped, stirred at room temperature for 10 min, then removed from the glovebox. The vial was uncapped, and the mixture was stirred open to air at room temperature overnight. The mixture was evaporated to dryness under reduced pressure. The resulting dark solid was suspended in MeOH (10 mL), filtered, and washed with additional MeOH (3 × 2 mL). The precipitate was recovered with CHCl<sub>3</sub> and concentrated *in vacuo* to yield **Ru<sub>6</sub>(12O-CPP)** as a dark red solid (3.3 mg, 54%).

Note: due to potential sensitivity of the product to acid, chlorinated solvents were stored over potassium carbonate prior to use.

<sup>1</sup>H NMR (500 MHz, CDCl<sub>3</sub>) δ 7.82–7.47 (m), 5.59 (br), 5.28 (br), 3.94 (br), 2.22 (br), 1.36 (br). HRMS (MALDI) *m/z*: found 2681.1409 ([M–Cl]<sup>+</sup> calc'd: 2681.1543 for C<sub>132</sub>H<sub>120</sub>O<sub>12</sub>Cl<sub>5</sub>Ru<sub>6</sub>).

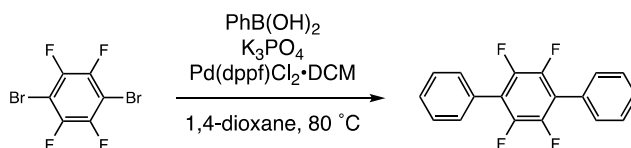

**Synthesis of 1,2,4,5-tetrafluoro-3,6-diphenylbenzene.** A Schlenk flask was charged with 1,4-dibromo-2,3,5,6-tetrafluorobenzene (6.02 g, 19.6 mmol), phenylboronic acid (6.21 g, 50.9 mmol, 2.6 equiv), and 1,4-dioxane (150 mL). The mixture was sparged with nitrogen for 30 min. A concentrated aqueous solution of  $K_3PO_4$  (22.9 g, 108 mmol, 5.5 equiv) was also sparged with nitrogen for 30 min and transferred to the Schlenk flask *via* cannula. Under nitrogen,  $Pd(dppf)Cl_2 \cdot DCM$  (0.301 g, 0.369 mmol, 1.9 mol%) was added and the reaction was heated at 80 °C for 24 hours. The solvent was removed *in vacuo* and the resulting solid was suspended in  $H_2O$  (400 mL). The solid was collected by vacuum filtration and washed with MeOH (250 mL) to give 1,2,4,5-tetrafluoro-3,6-diphenylbenzene as a fine gray crystalline solid (5.85 g, 99%).

$^1H$  NMR (500 MHz,  $CDCl_3$ )  $\delta$  7.45–7.53 (m, 10H).  $^{19}F\{^1H\}$  NMR (471 MHz,  $CDCl_3$ )  $\delta$  -147.58. MS (EI)  $m/z$ : found 302.1 ( $[M]^+$  calc'd: 302.1 for  $C_{18}H_{10}F_4$ ).  $^{13}C$  NMR could not be obtained due to poor solubility.

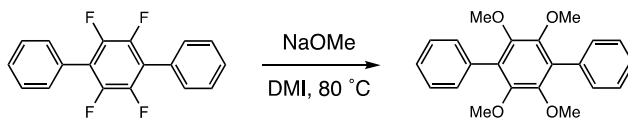

**Optimized conditions for the synthesis of 1,2,4,5-tetramethoxy-3,6-diphenylbenzene.** In a nitrogen-filled glovebox, a 4 mL scintillation vial was charged with 1,2,4,5-tetrafluoro-3,6-diphenylbenzene (25.0 mg, 82.5  $\mu$ mol), sodium methoxide (71.3 mg, 132  $\mu$ mol, 16 equiv), and DMI (1 mL). The vial was sealed and stirred at 80 °C for 16 hours. Aqueous 1M HCl (20 mL) was added, and the mixture was extracted with ethyl acetate ( $2 \times 10$  mL). The combined organic layers were washed with  $H_2O$  ( $2 \times 10$  mL), dried over magnesium sulfate, gravity filtered, and the solvent was removed *in vacuo* to give 1,2,4,5-tetramethoxy-3,6-diphenylbenzene as a white crystalline solid (24.9 mg, 86%).  $^1H$  NMR and MS data match the previously reported data for this compound.<sup>6</sup>

Note: Determination of purity was performed by diluting an aliquot of the ethyl acetate extracts in DCM for analysis by GC-MS. Conditions that were too mild yielded a mixture containing partially fluorinated intermediates and conditions that were too harsh lead to partial *in situ* demethylation of one of the methoxy substituents. In both cases, these mixtures would be challenging to purify. The use of DMI as a solvent provided a slight improvement in product purity over NMP (94% *versus* 91%, respectively). However, in both NMP and DMI, as long as no demethylation was observed, resubjecting the worked-up product mixture to a second round of heating with additional sodium methoxide (71.3 mg, 132  $\mu$ mol, 16 equiv) at 80 °C for an additional 16 hr reliably gave complete conversion to the tetrasubstituted product, 1,2,4,5-tetramethoxy-3,6-diphenylbenzene.

### 3. Single Crystal X-Ray Diffraction

Standard single-crystal X-ray diffraction (SCXRD) data was collected at 100 K on a Bruker APEX II single crystal X-ray diffractometer equipped with a Mo-radiation source and a Miracol X-ray optical collimator. Synchrotron SCXRD data was collected on Beamline 12.2.1 at the Advanced Light Source (ALS), Lawrence Berkeley National Lab (Berkeley, CA, USA).

All data was integrated and scaled using SAINT, SADABS within the APEX2 software package by Bruker.<sup>7</sup> Solution by direct methods using SHELXT produced a complete heavy atom phasing model consistent with the proposed structure.<sup>8,9</sup> The structures were completed by difference Fourier synthesis with SHELXL.<sup>10,11</sup> Scattering factors are from Waasmair and Kirfel.<sup>12</sup> Hydrogen atoms were placed in geometrically idealized positions and constrained to ride on their parent atoms with C–H distances in the range 0.95–1.00 Å. Isotropic thermal parameters  $U_{eq}$  were fixed such that they were  $1.2U_{eq}$  of their parent atom  $U_{eq}$  for CH's and  $1.5U_{eq}$  of their parent atom  $U_{eq}$  for methyl groups. All non-hydrogen atoms were refined anisotropically by full-matrix least-squares.

**Synchrotron SCXRD of 4F-CPP.** A colorless needle measuring  $0.30 \times 0.09 \times 0.04$  mm<sup>3</sup> was mounted on a loop with oil. Data collection was 98.8% complete to  $25.930^\circ$  in  $\theta$ . The data was integrated as a two-component twin. The twin law is a two-fold rotation about  $[0\ 0\ 1]$  with a minor twin fraction of 0.258(2), refined from HKLF5 data. A total of 6324 reflections were collected covering the indices,  $-24 \leq h \leq 22$ ,  $0 \leq k \leq 10$ ,  $0 \leq l \leq 16$ . 6324 reflections were symmetry independent and the  $R_{int} = 0.0408$ . Indexing and unit cell refinement indicated a primitive monoclinic lattice. The space group was found to be  $P\ 2_1/c$  (No. 14).

The contribution of disordered trichloroethylene molecules to the diffraction pattern was removed with SQUEEZE.<sup>13–15</sup> The tetrafluorophenylene unit is disordered with an unfunctionalized phenylene, and thus there are a total of four fluorine atoms per CPP.

**SCXRD of 4MeO-CPP.** A yellow needle measuring  $0.60 \times 0.15 \times 0.09$  mm<sup>3</sup> was mounted on a loop with oil. Crystal-to-detector distance was 45 mm and exposure time was 180 seconds per frame for all sets. The scan width was  $0.5^\circ$ . Data collection was 99.2% complete to  $25^\circ$  in  $\theta$ . A total of 101139 merged reflections were collected covering the indices,  $-68 \leq h \leq 68$ ,  $-14 \leq k \leq 14$ ,  $-60 \leq l \leq 60$ . 15535 reflections were symmetry independent and the  $R_{int} = 0.1097$ . Indexing and unit cell refinement indicated an F-centered orthorhombic lattice. The space group was found to be  $F\ d\ d\ 2$  (No. 43).

Due to extensive disorder, the diffraction abruptly fell off at a resolution of about 1 Å (**Fig. S44**). This effect is intrinsic to these crystals and a longer exposure time or stronger radiation source would not solve this problem. SQUEEZE analysis showed that a total of 5492 electrons were in solvent accessible voids, the contribution of which to the diffraction pattern was then removed.<sup>13–15</sup> This is more than half of the electrons of the refined structure ( $F_0 = 9728$ ). One trichloroethylene was found per molecule, but no other solvent molecule could be individually identified. After removal of 116 bad peaks and linking all phenyls with SAME commands in SHELXL, the structure still needed additional restraints. All phenyl-phenyl distances were linked and some thermal displacement parameters were stabilized. A disordered phenyl group was treated accordingly.

**Synchrotron SCXRD of 12MeO-CPP.** A colorless shard measuring  $0.20 \times 0.10 \times 0.10 \text{ mm}^3$  was mounted on a loop with oil. Data collection was 99.0% complete to  $25.709^\circ$  in  $\theta$ . A total of 25207 reflections were collected covering the indices,  $-24 \leq h \leq 23$ ,  $-11 \leq k \leq 11$ ,  $0 \leq l \leq 47$ . 13026 reflections were symmetry independent and the  $R_{\text{int}} = 0.0251$ . Indexing and unit cell refinement indicated a primitive monoclinic lattice. The space group was found to be  $P 2_1/a$  (No. 14).

**SCXRD of  $\text{Ru}_2(\text{Ph}_2\text{dhbq})$ .** A black shard measuring  $0.09 \times 0.06 \times 0.05 \text{ mm}^3$  was mounted on a loop with oil. Crystal-to-detector distance was 40 mm and exposure time was 20 seconds per frame for all sets. The scan width was  $0.5^\circ$ . Data collection was 100.0% complete to  $25^\circ$  in  $\theta$ . A total of 16214 reflections were collected covering the indices,  $-15 \leq h \leq 15$ ,  $-14 \leq k \leq 14$ ,  $-18 \leq l \leq 18$ . 4178 reflections were symmetry independent and  $R_{\text{int}} = 0.0744$ . Indexing and unit cell refinement indicated a primitive monoclinic lattice. The space group was found to be  $P 2_1/n$  (No. 14).

#### 4. Computational Details

Geometry optimization and frequency calculations were performed in the Gaussian 16 suite of software.<sup>16</sup> All calculations were carried out with the B3LYP hybrid functional<sup>17–20</sup> and a split basis of LANL2DZ (Ru atoms)<sup>21–23</sup> and 6-31G\* (H, C, O, and Cl atoms)<sup>24–27</sup>. Optimized geometries were verified to be true minima by the absence of imaginary frequencies in vibrational frequency calculations at the same level. For the ease of calculations,  $\eta^6$ -cymene ligands on **Ru<sub>2</sub>(4O-CPP)** and **Ru<sub>6</sub>(12O-CPP)** have been modeled as  $\eta^6$ -benzene.

Structural optimization of **Ru<sub>2</sub>(4O-CPP)** was performed on structures with the following relative positions of Cl atoms:

1. *Trans* (**Fig. S37**)
2. *Cis* with both Cl atoms inside of the ring (**Fig. S38**)
3. *Cis* with both Cl atoms outside of the ring (**Fig. S39**)

Analysis of the resulting structures reveals that the *trans* configuration is the lowest energy of the three configurational isomers.

Structural optimization of **Ru<sub>6</sub>(12O-CPP)** was performed on structures with the following relative positions of the three Cl atom pairs (within each pair, the Cl atoms were in the *trans* configuration based on results from **Ru<sub>2</sub>(4O-CPP)**):

1. All Cl atom pairs oriented the same way (contains a C<sub>3</sub> axis of rotation; **Fig. S40**)
2. One Cl atom pair oriented opposite to the two other pairs (no C<sub>3</sub> axis of rotation; **Fig. S41**)

Analysis of the resulting structures reveals that the higher-symmetry configuration is the lower energy of the two configurational isomers.

As discussed in the main text, bond lengths for the optimized structure of **Ru<sub>2</sub>(4O-CPP)** fall within the range observed in the single crystal structure of **Ru<sub>2</sub>(Ph<sub>2</sub>dhbq)**. Similarly, the optimized structure of **Ru<sub>6</sub>(12O-CPP)** reveals bond lengths that are within the range observed in the single crystal structure of **Ru<sub>2</sub>(Ph<sub>2</sub>dhbq)**. The bond lengths in the optimized structure of **Ru<sub>6</sub>(12O-CPP)** also closely match those of the optimized structure **Ru<sub>2</sub>(4O-CPP)**, with average bond lengths of 1.2781(3) and 1.2779(8) Å for the C–O bonds and average bond lengths of 2.0794(16) and 2.0799(14) Å for the Ru–O bonds, for **Ru<sub>6</sub>(12O-CPP)** and **Ru<sub>2</sub>(4O-CPP)** respectively.

There appears to be slightly more asymmetry in the C–O and Ru–O bond lengths within the Ru–catechol chelate ring in the single crystal structure of **Ru<sub>2</sub>(Ph<sub>2</sub>dhbq)** relative to the optimized structures of **Ru<sub>2</sub>(4O-CPP)** and **Ru<sub>6</sub>(12O-CPP)** (**Table S1**). However, this lower degree of bond asymmetry was also observed in the DFT optimized structure of **Ru<sub>2</sub>(Ph<sub>2</sub>dhbq)** at the same level of theory (**Fig. S42**). This asymmetry did not appear to increase in **Ru<sub>2</sub>(Ph<sub>2</sub>dhbq)** when calculations were performed with larger basis sets (*e.g.* def2-TZVP on all atoms)<sup>28</sup>.

**Table S1.** Bond lengths observed in the single crystal structure of **Ru<sub>2</sub>(Ph<sub>2</sub>dhbq)** compared to the bond lengths observed in the lowest-energy DFT optimized geometries of **Ru<sub>2</sub>(Ph<sub>2</sub>dhbq)**, **Ru<sub>2</sub>(4O-CPP)**, and **Ru<sub>6</sub>(12O-CPP)**.

|                                 | <b>Ru<sub>2</sub>(Ph<sub>2</sub>dhbq)</b><br>SCXRD | <b>Ru<sub>2</sub>(Ph<sub>2</sub>dhbq)</b><br>DFT | <b>Ru<sub>2</sub>(4O-CPP)</b><br>DFT | <b>Ru<sub>6</sub>(12O-CPP)</b><br>DFT |
|---------------------------------|----------------------------------------------------|--------------------------------------------------|--------------------------------------|---------------------------------------|
| <b>C–O Bond Lengths</b><br>(Å)  | 1.274(3)                                           | 1.27822                                          | 1.27719                              | 1.27785                               |
|                                 | 1.278(3)                                           | 1.27822                                          | 1.27736                              | 1.27786                               |
|                                 |                                                    | 1.27865                                          | 1.27855                              | 1.27788                               |
|                                 |                                                    | 1.27865                                          | 1.27866                              | 1.27789                               |
|                                 |                                                    |                                                  |                                      | 1.27789                               |
|                                 |                                                    |                                                  |                                      | 1.27794                               |
|                                 |                                                    |                                                  |                                      | 1.27830                               |
|                                 |                                                    |                                                  |                                      | 1.27835                               |
|                                 |                                                    |                                                  |                                      | 1.27836                               |
|                                 |                                                    |                                                  |                                      | 1.27845                               |
|                                 |                                                    |                                                  |                                      | 1.27847                               |
|                                 |                                                    |                                                  | 1.27848                              |                                       |
| <b>Ru–O Bond Lengths</b><br>(Å) | 2.070(2)                                           | 2.08609                                          | 2.07860                              | 2.07754                               |
|                                 | 2.092(2)                                           | 2.08609                                          | 2.07921                              | 2.07769                               |
|                                 |                                                    | 2.09074                                          | 2.08014                              | 2.07797                               |
|                                 |                                                    | 2.09074                                          | 2.08174                              | 2.07797                               |
|                                 |                                                    |                                                  |                                      | 2.07812                               |
|                                 |                                                    |                                                  |                                      | 2.07824                               |
|                                 |                                                    |                                                  |                                      | 2.08006                               |
|                                 |                                                    |                                                  |                                      | 2.08030                               |
|                                 |                                                    |                                                  |                                      | 2.08050                               |
|                                 |                                                    |                                                  |                                      | 2.08119                               |
|                                 |                                                    |                                                  |                                      | 2.08129                               |
|                                 |                                                    |                                                  | 2.08162                              |                                       |

## 5. Supplementary Figures:

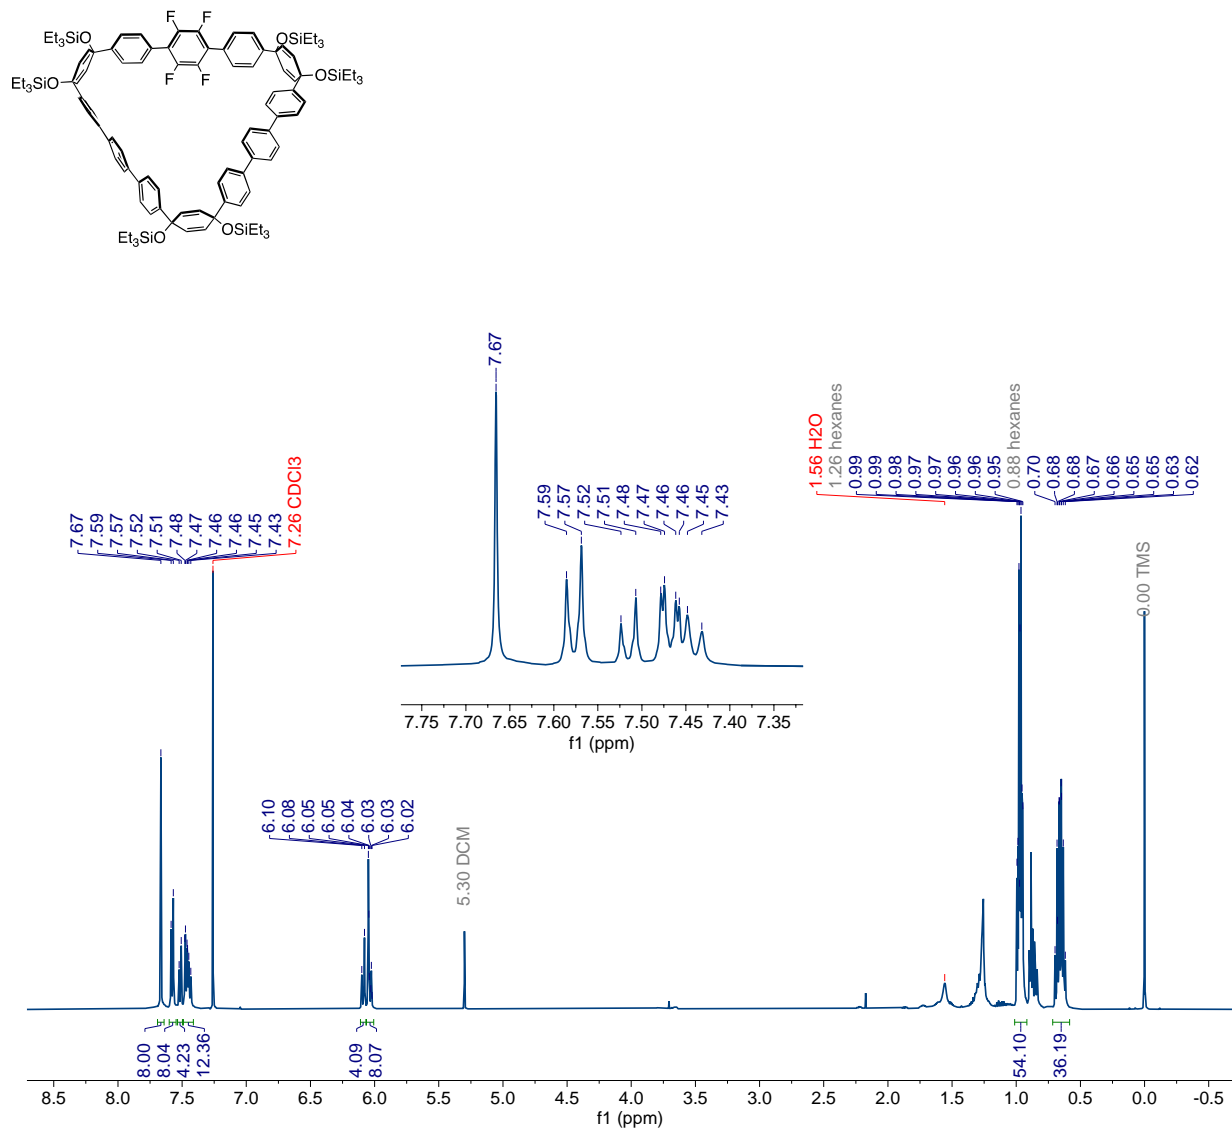

**Figure S1.** <sup>1</sup>H NMR spectrum of **4F-MC-OTES** (500 MHz, CDCl<sub>3</sub>, 298 K).

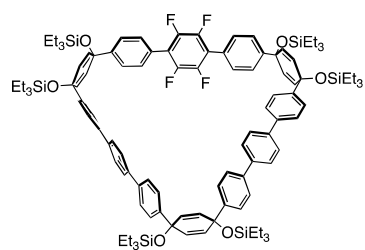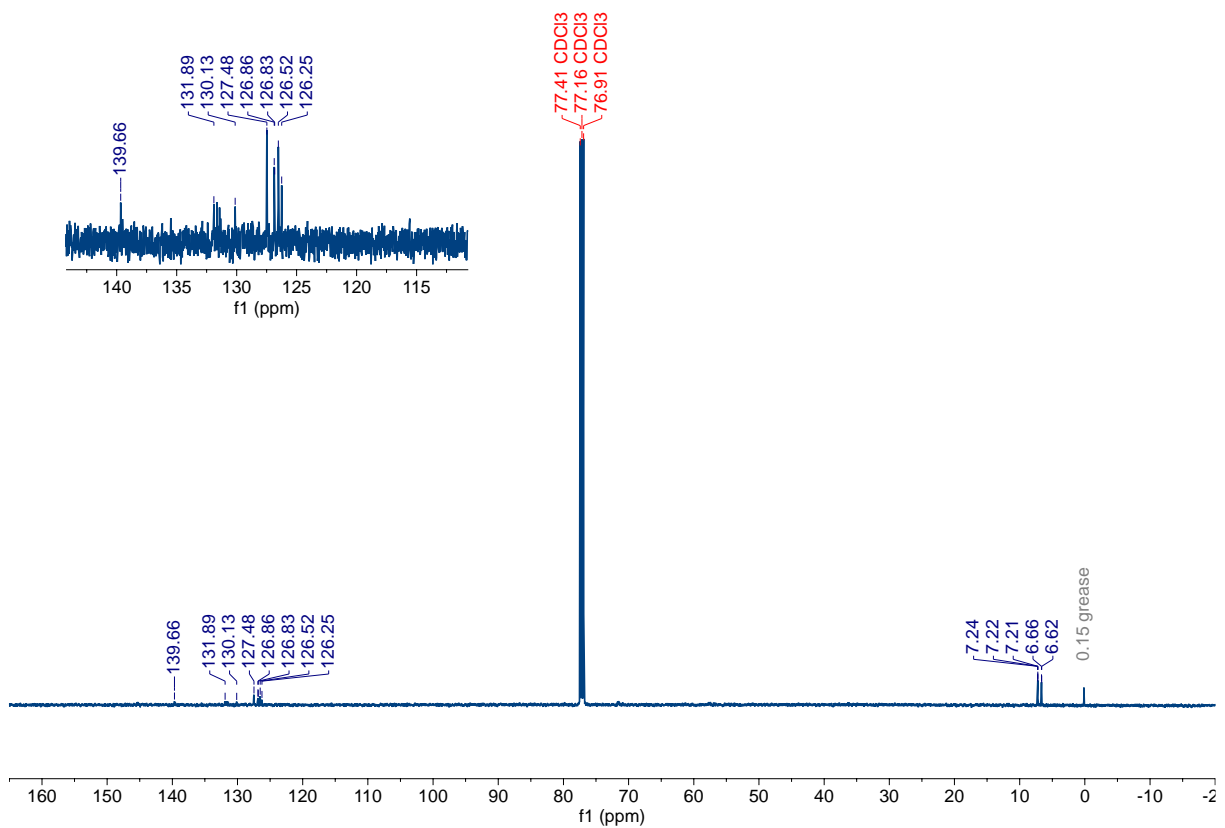

**Figure S2.**  $^{13}\text{C}\{^1\text{H}\}$  NMR spectrum of 4F-MC-OTES (126 MHz,  $\text{CDCl}_3$ , 298 K).



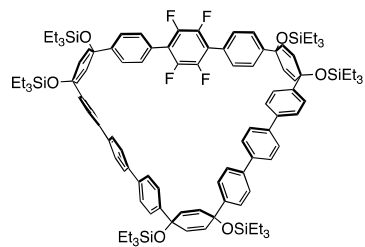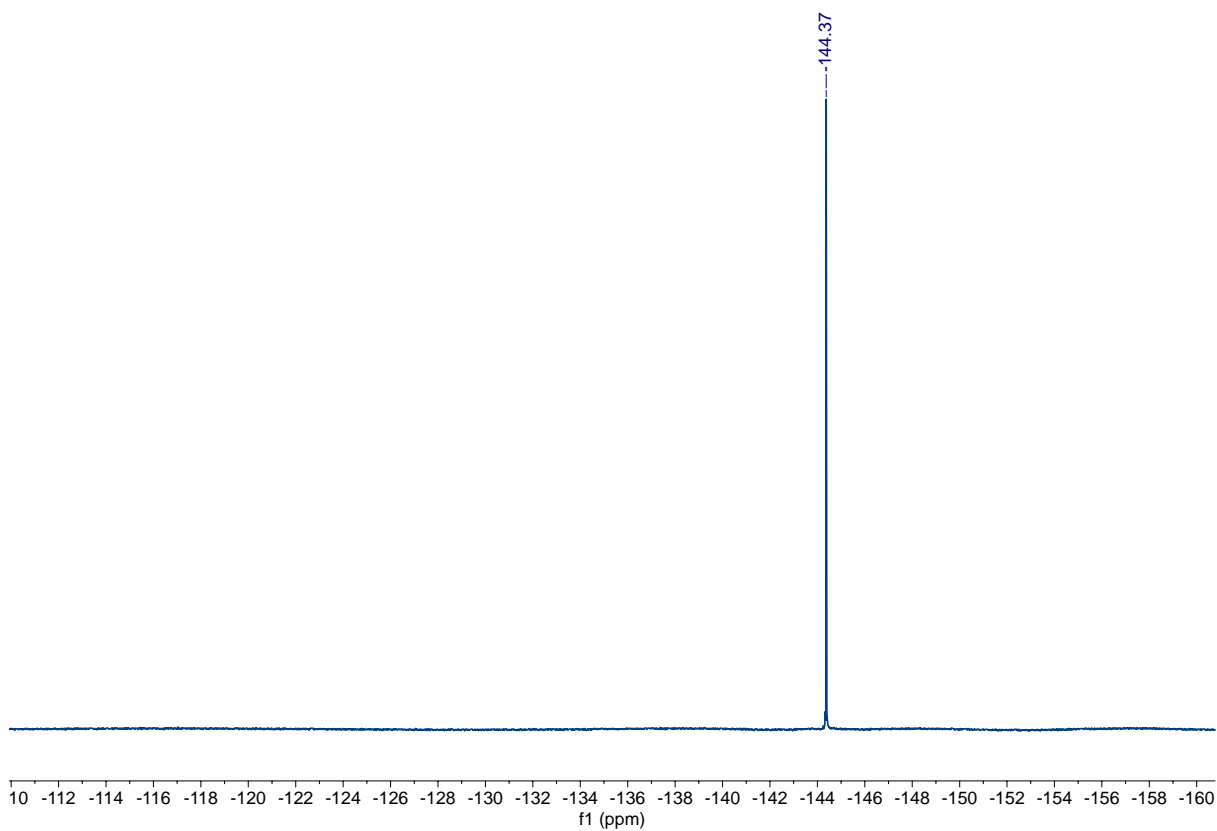

**Figure S3.** <sup>19</sup>F{<sup>1</sup>H} NMR spectrum of **4F-MC-OTES** (470 MHz, CDCl<sub>3</sub>, 298 K).

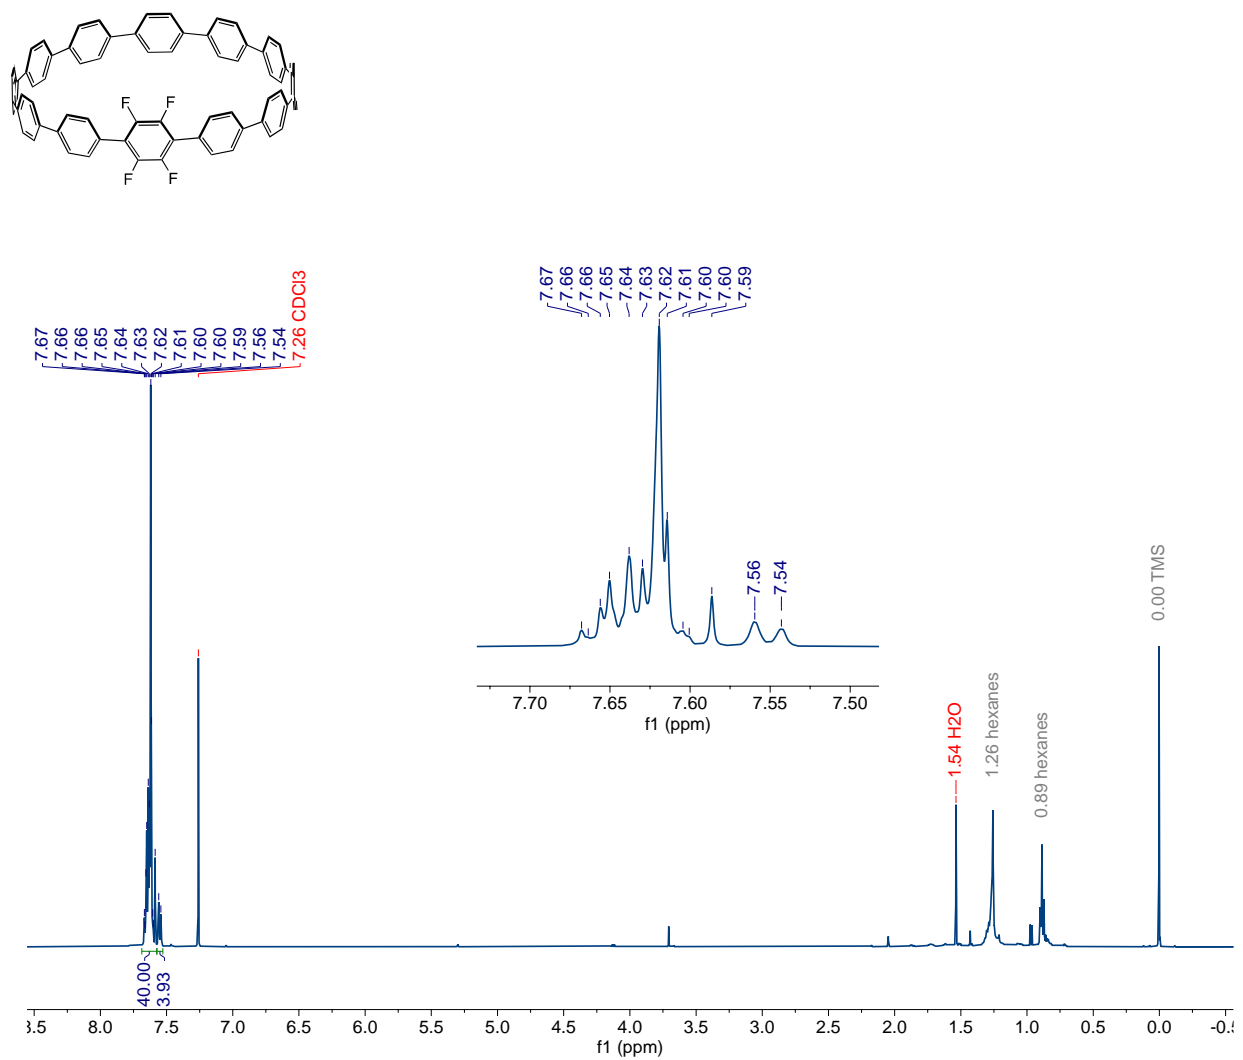

**Figure S4.** <sup>1</sup>H NMR spectrum of **4F-CPP** (500 MHz, CDCl<sub>3</sub>, 298 K).

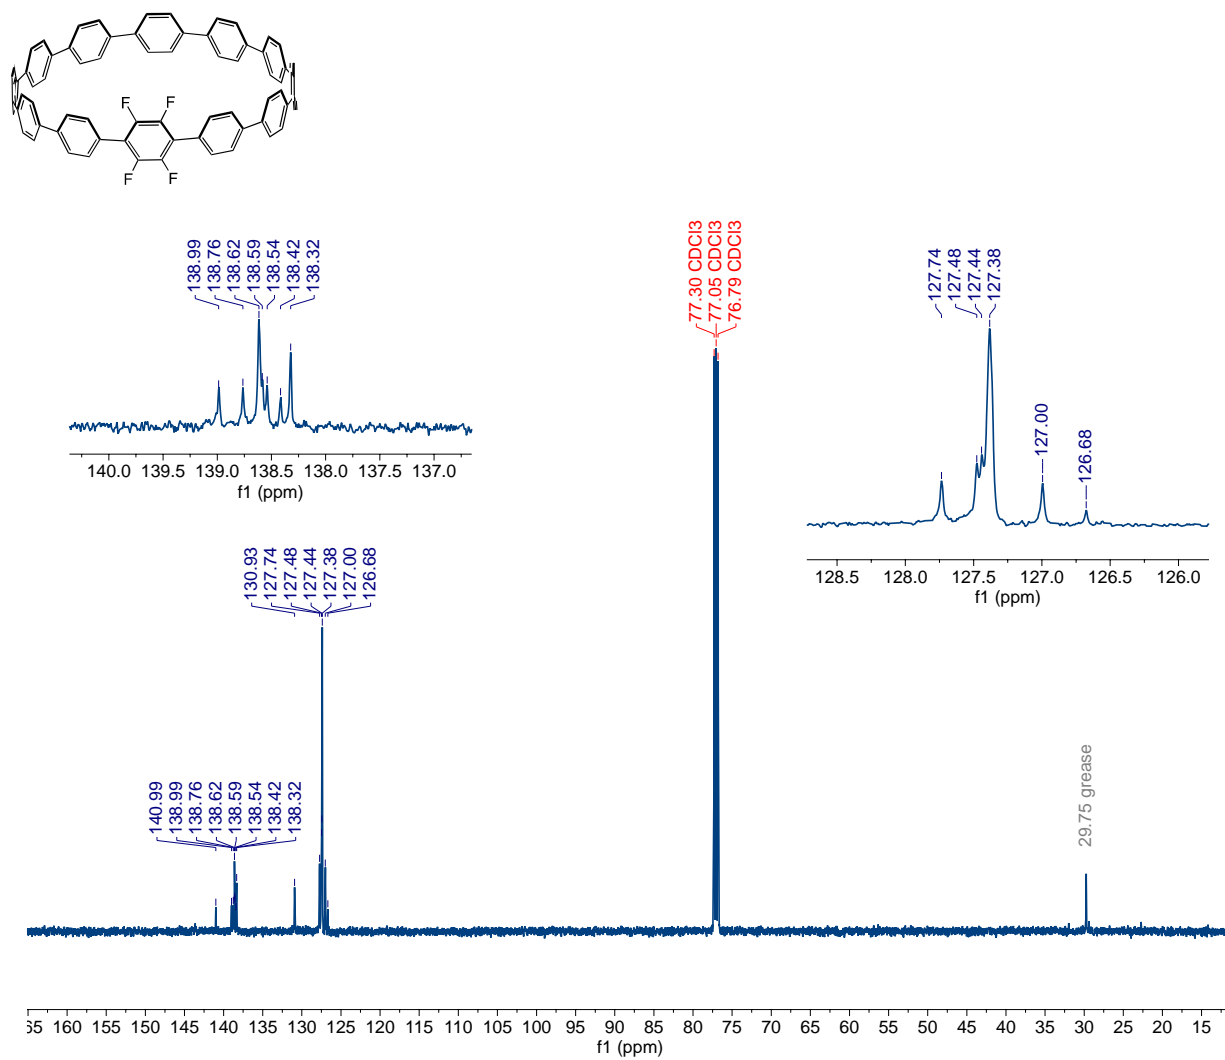

**Figure S5.**  $^{13}\text{C}\{^1\text{H}\}$  NMR spectrum of 4F-CPP (126 MHz,  $\text{CDCl}_3$ , 298 K).

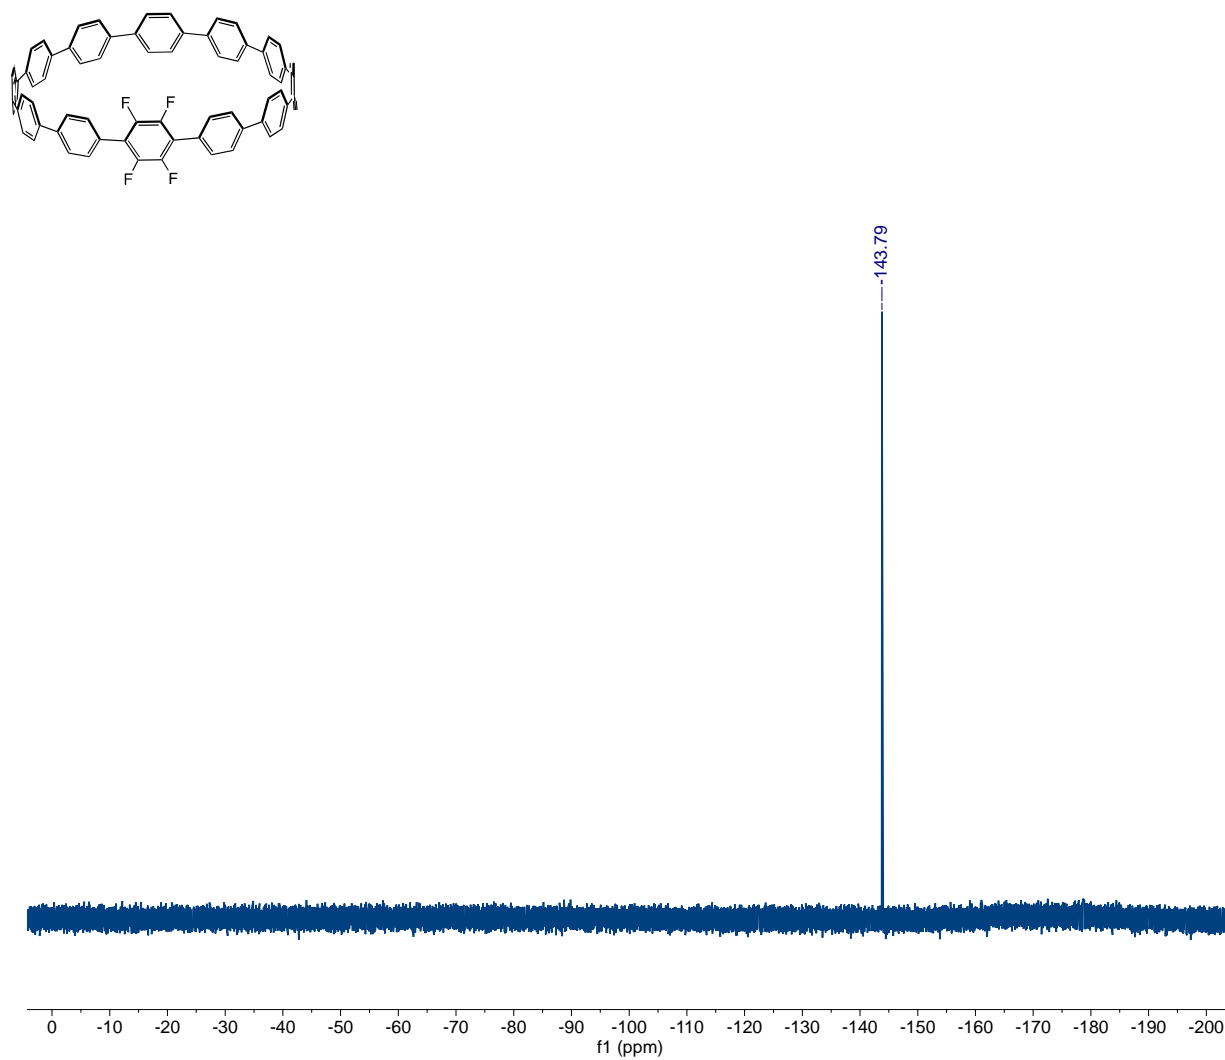

**Figure S6.**  $^{19}\text{F}$  NMR spectrum of **4F-CPP** (470 MHz,  $\text{CDCl}_3$ , 298 K).

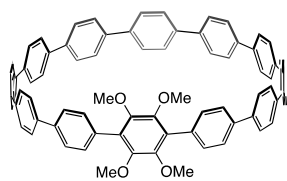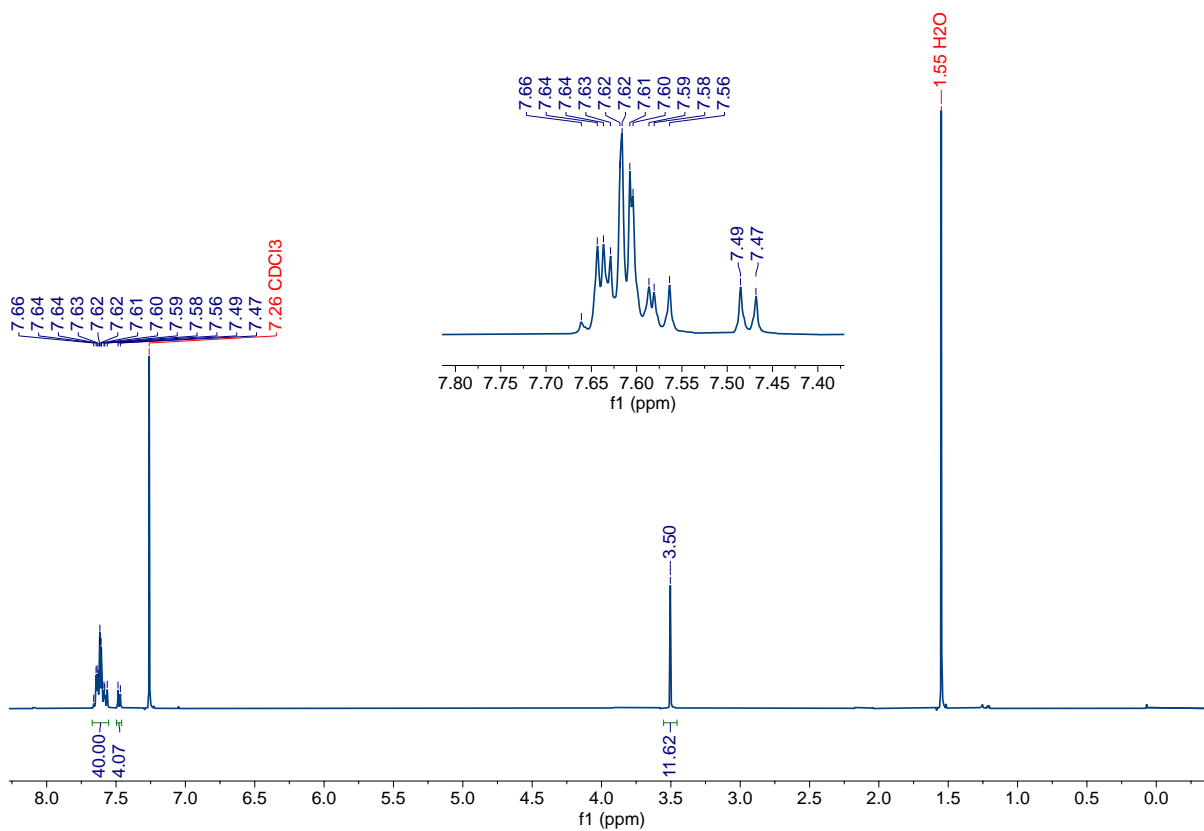

**Figure S7.** <sup>1</sup>H NMR spectrum of **4MeO-CPP** (500 MHz, CDCl<sub>3</sub>, 298 K).

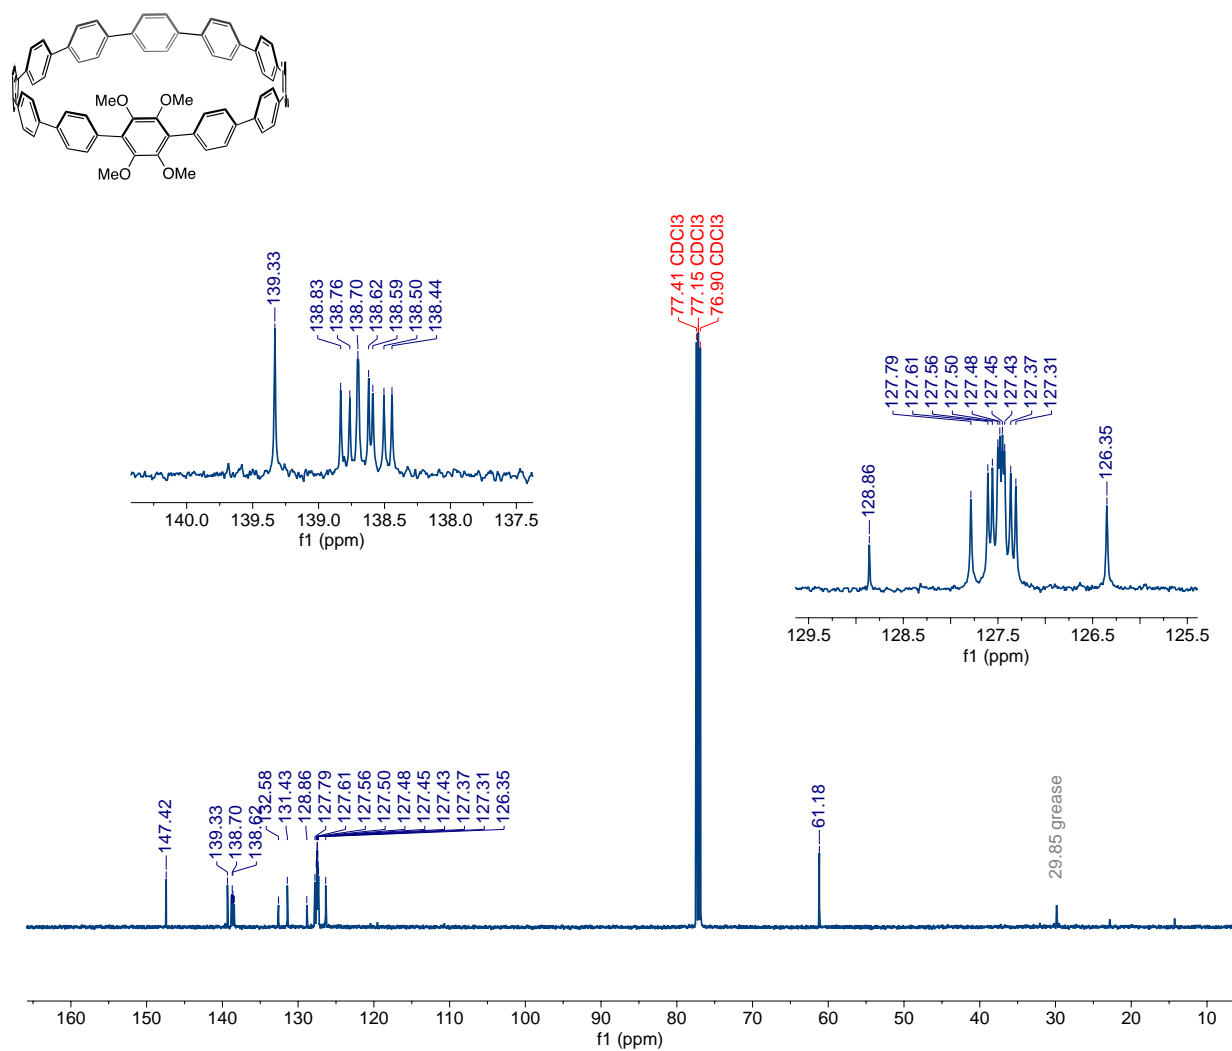

**Figure S8.**  $^{13}\text{C}\{^1\text{H}\}$  NMR spectrum of **4MeO-CPP** (126 MHz,  $\text{CDCl}_3$ , 298 K).

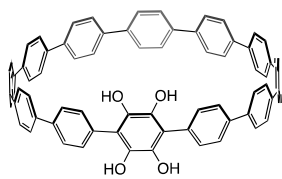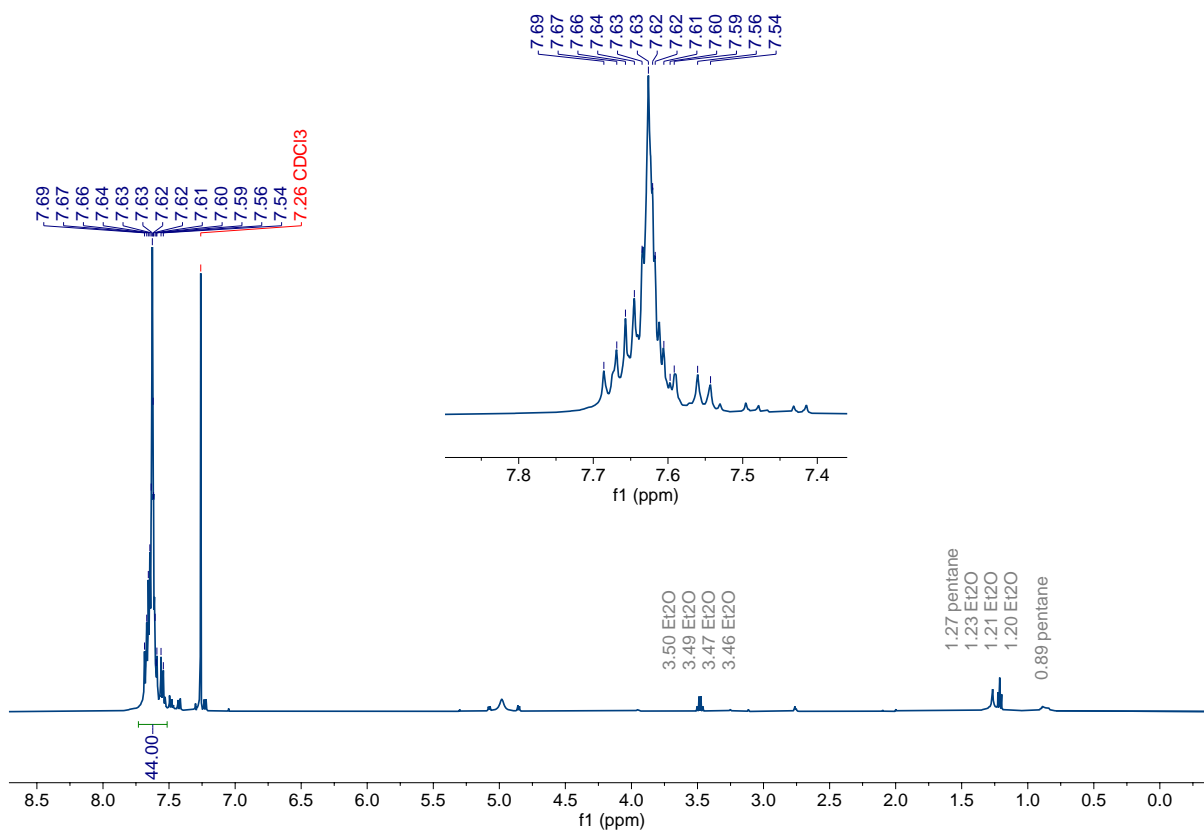

**Figure S9.** <sup>1</sup>H NMR spectrum of 4HO-CPP (500 MHz, CDCl<sub>3</sub>, 298 K).

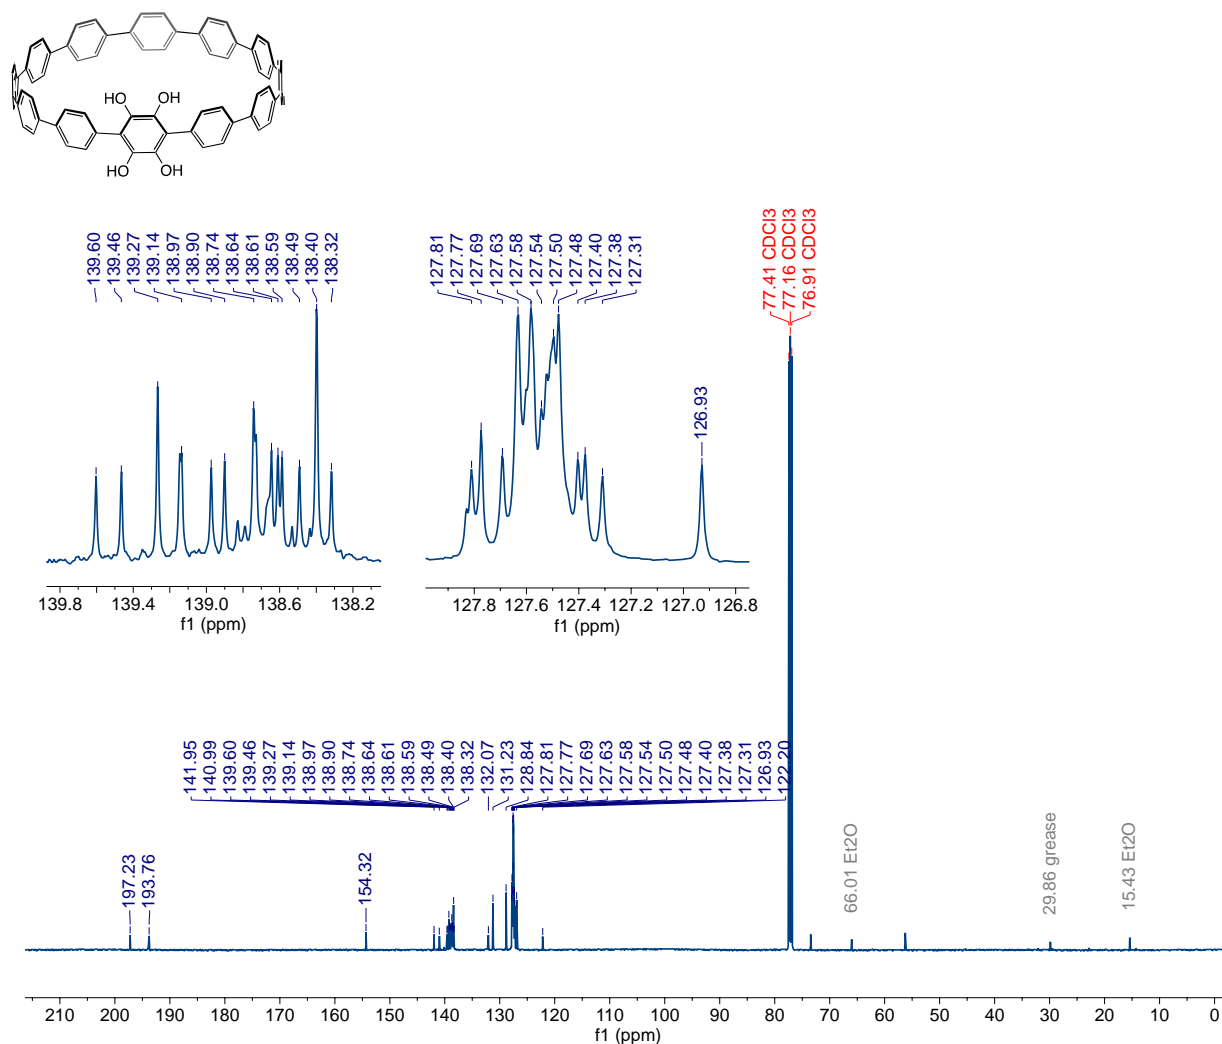

**Figure S10.**  $^{13}\text{C}\{^1\text{H}\}$  NMR spectrum of **4HO-CPP** (126 MHz,  $\text{CDCl}_3$ , 298 K). Note: we expect to observe 24 resonances in the aromatic region of the spectrum for the product in the as-synthesized state. The presence of additional resonances is likely due to partial oxidation of the dicatchol-substituted phenylene unit to the corresponding 2,5-dihydroxy-1,4-benzoquinone. This is further reinforced by the presence of resonances above 160 ppm, which are due to carbonyl-bound carbons, as well as by our high-resolution ESI-MS data, which shows the presence of oxidized species.



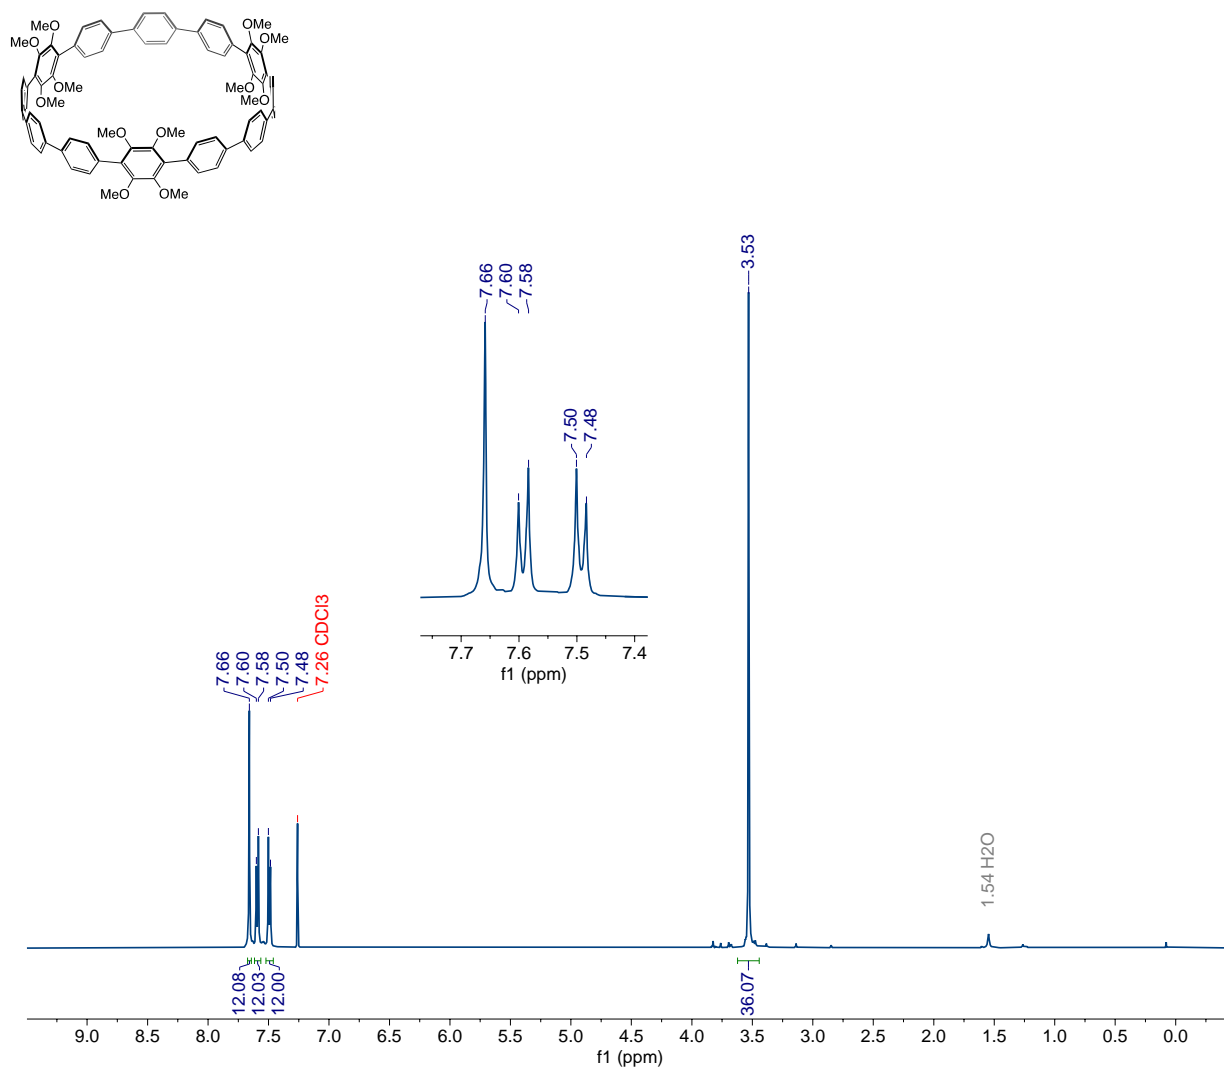

**Figure S11.** <sup>1</sup>H NMR spectrum of **12MeO-CPP** (500 MHz, CDCl<sub>3</sub>, 298 K).

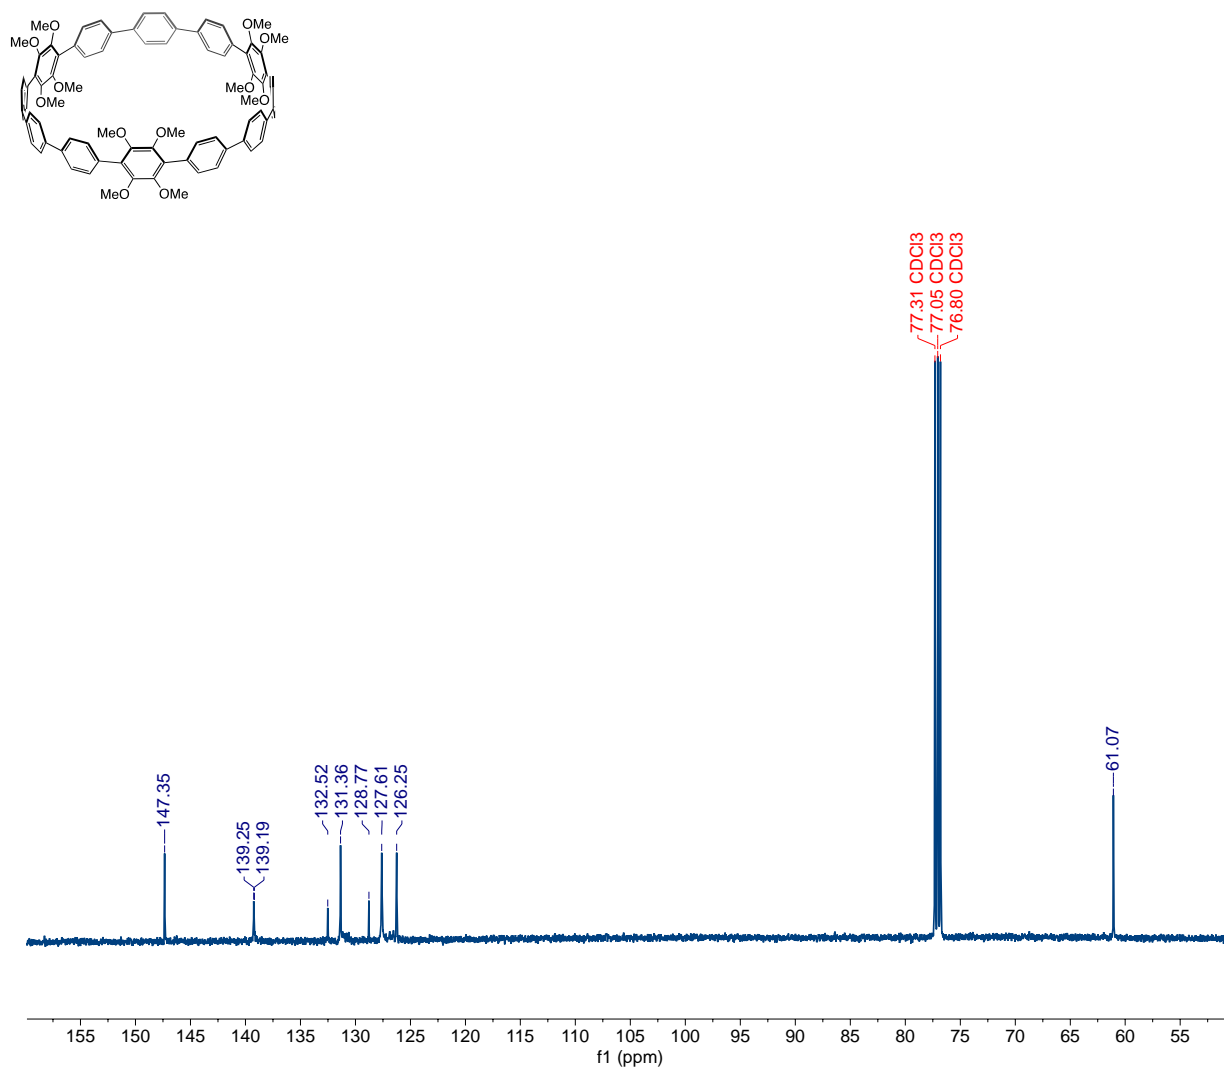

**Figure S12.**  $^{13}\text{C}\{^1\text{H}\}$  NMR spectrum of **12MeO-CPP** (126 MHz,  $\text{CDCl}_3$ , 298 K).

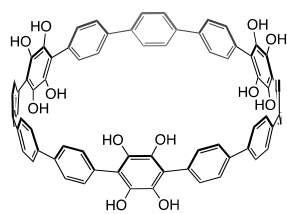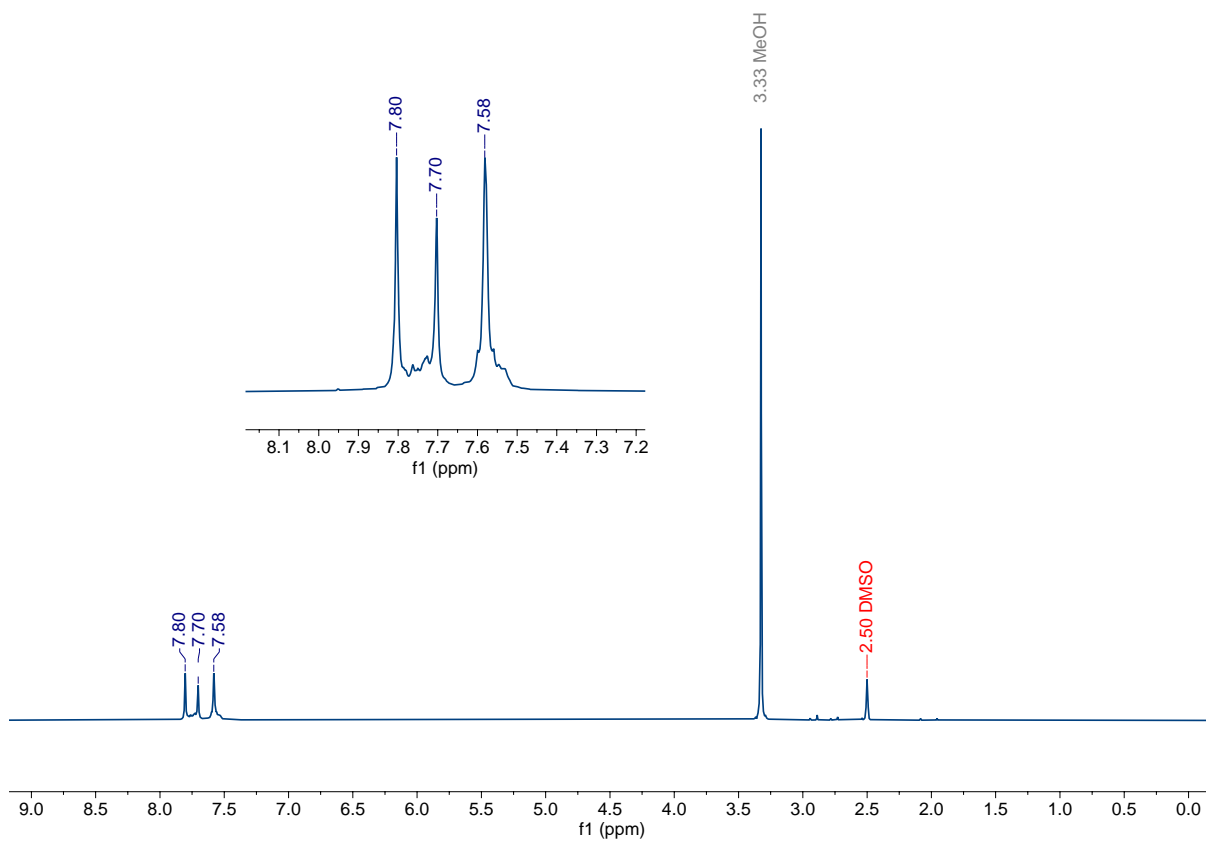

**Figure S13.**  $^1\text{H}$  NMR spectrum of **12HO-CPP** (500 MHz,  $\text{DMSO-}d_6$ , 298 K).



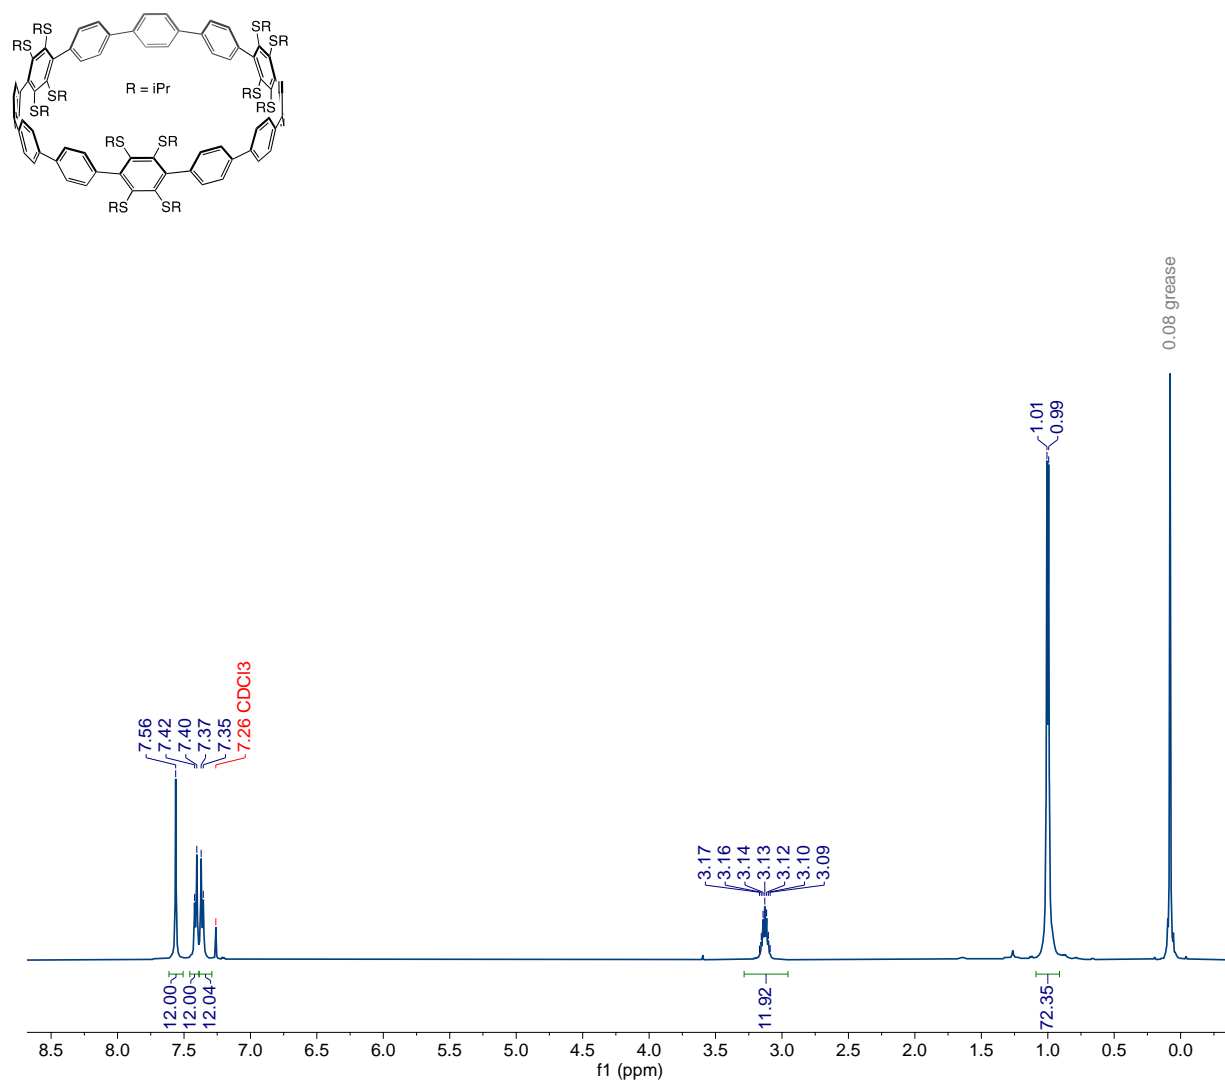

**Figure S15.** <sup>1</sup>H NMR spectrum of **12iPrS-CPP** (500 MHz, CDCl<sub>3</sub>, 298 K).

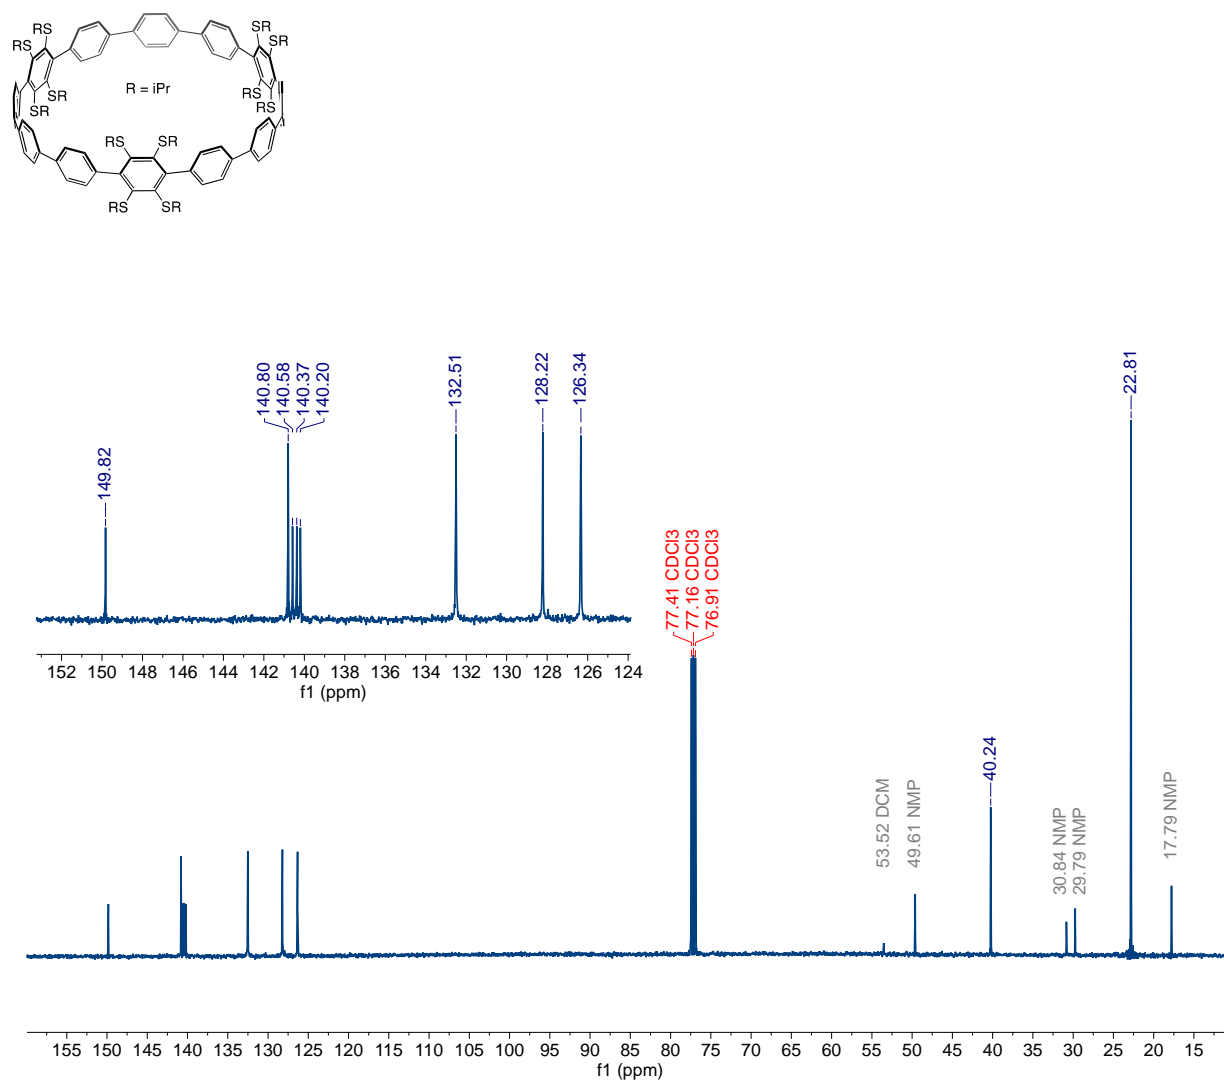

**Figure S16.**  $^{13}\text{C}\{^1\text{H}\}$  NMR spectrum of **12iPrS-CPP** (126 MHz,  $\text{CDCl}_3$ , 298 K).

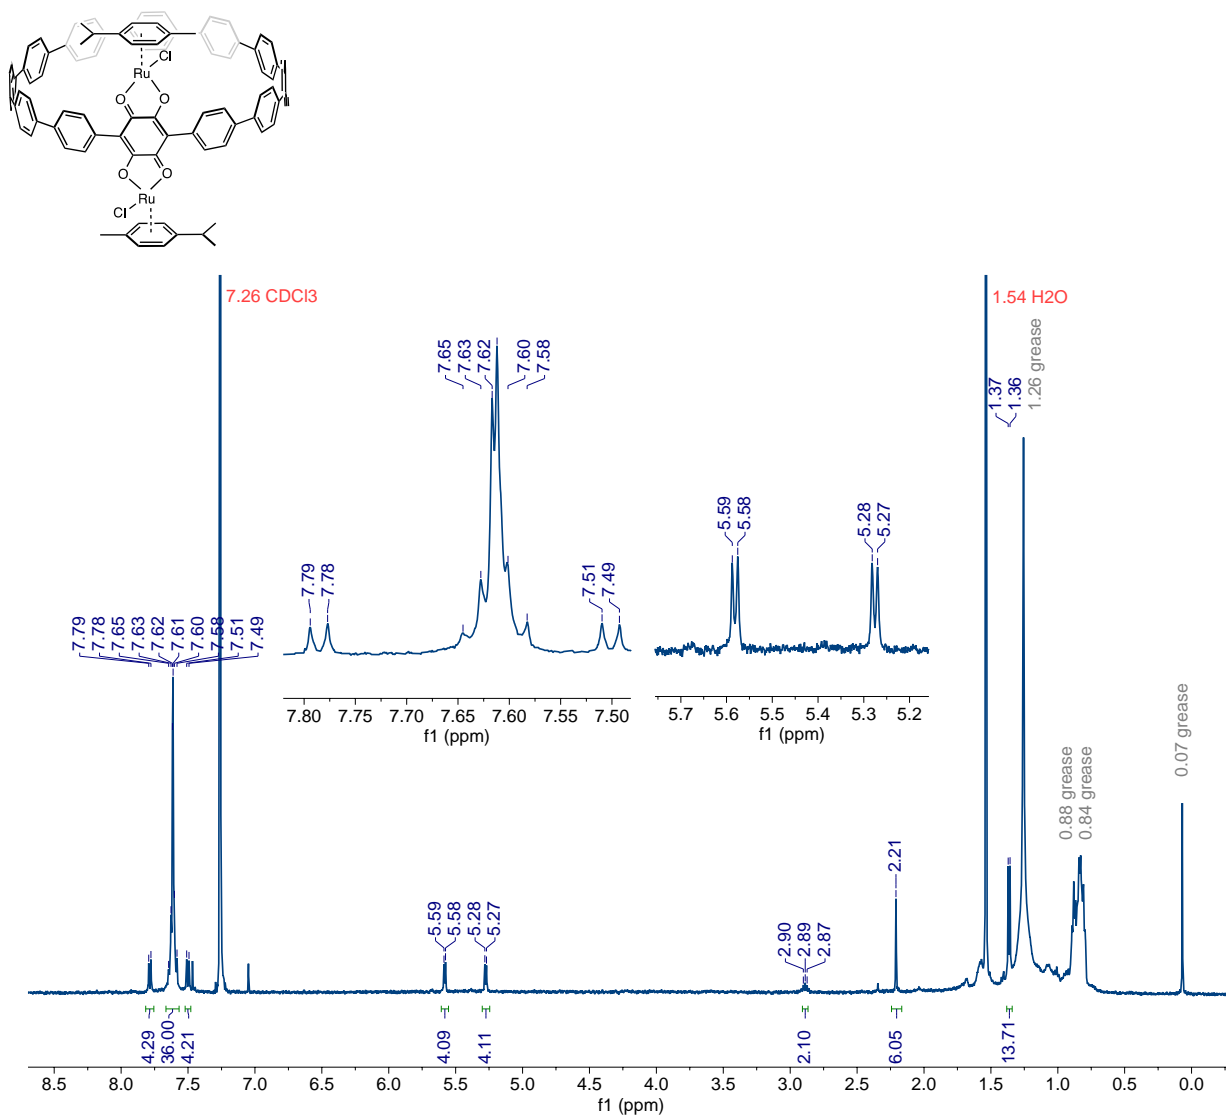

**Figure S17.**  $^1\text{H}$  NMR spectrum of  $\text{Ru}_2(40\text{-CPP})$  (500 MHz,  $\text{CDCl}_3$ , 298 K).

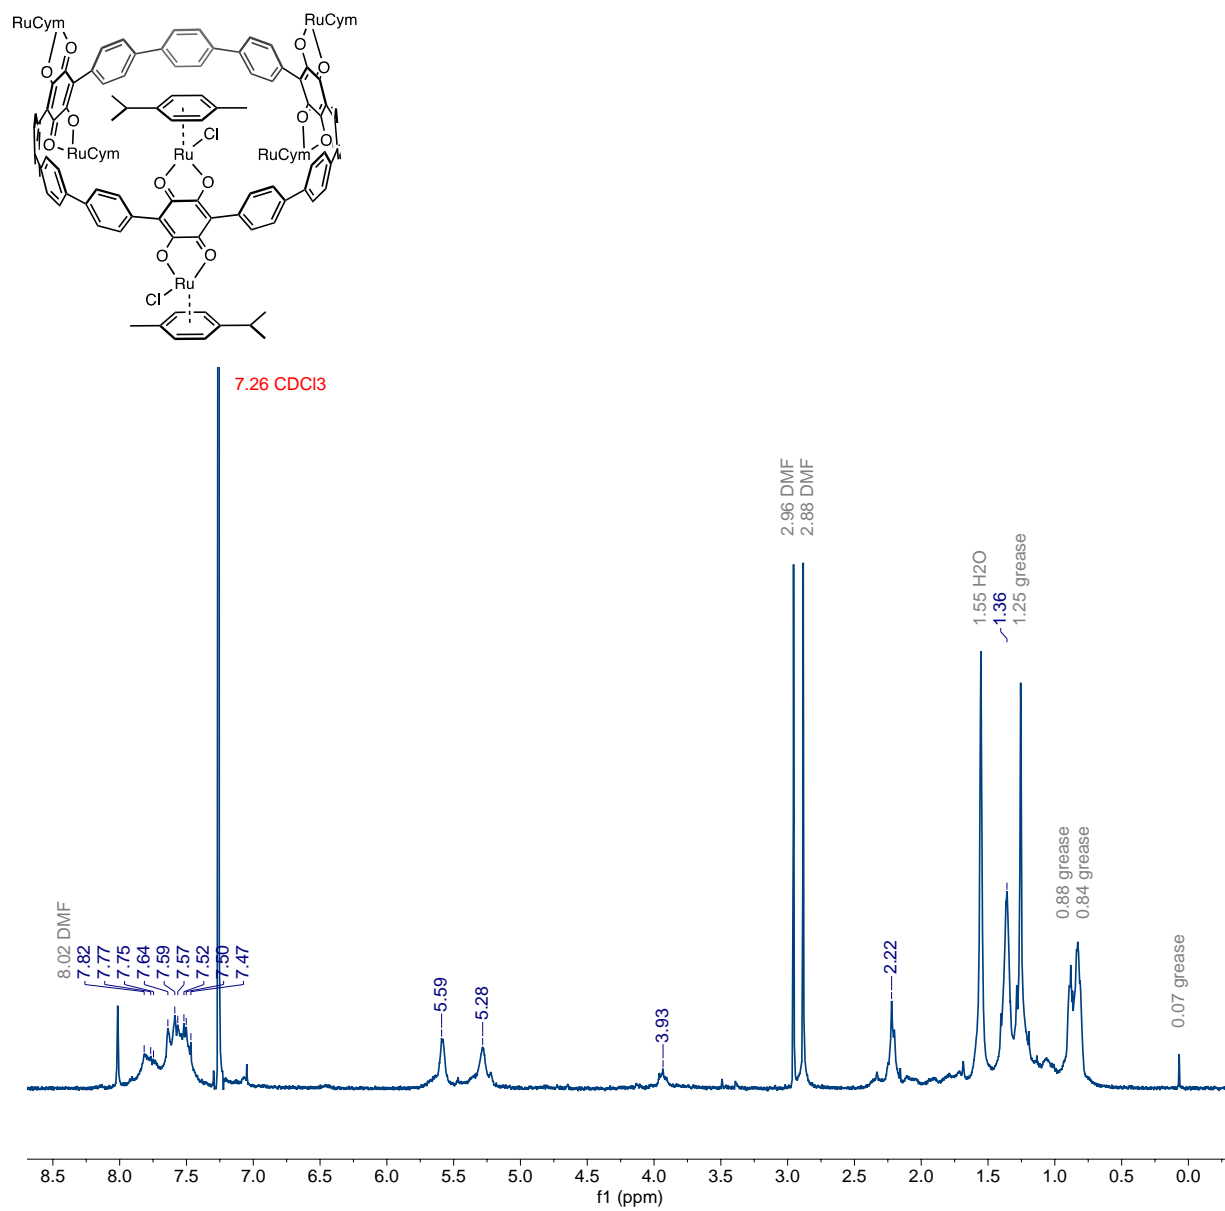

**Figure S18.**  $^1\text{H NMR}$  spectrum of  $\text{Ru}_6(12\text{O-CPP})$  (500 MHz,  $\text{CDCl}_3$ , 298 K).



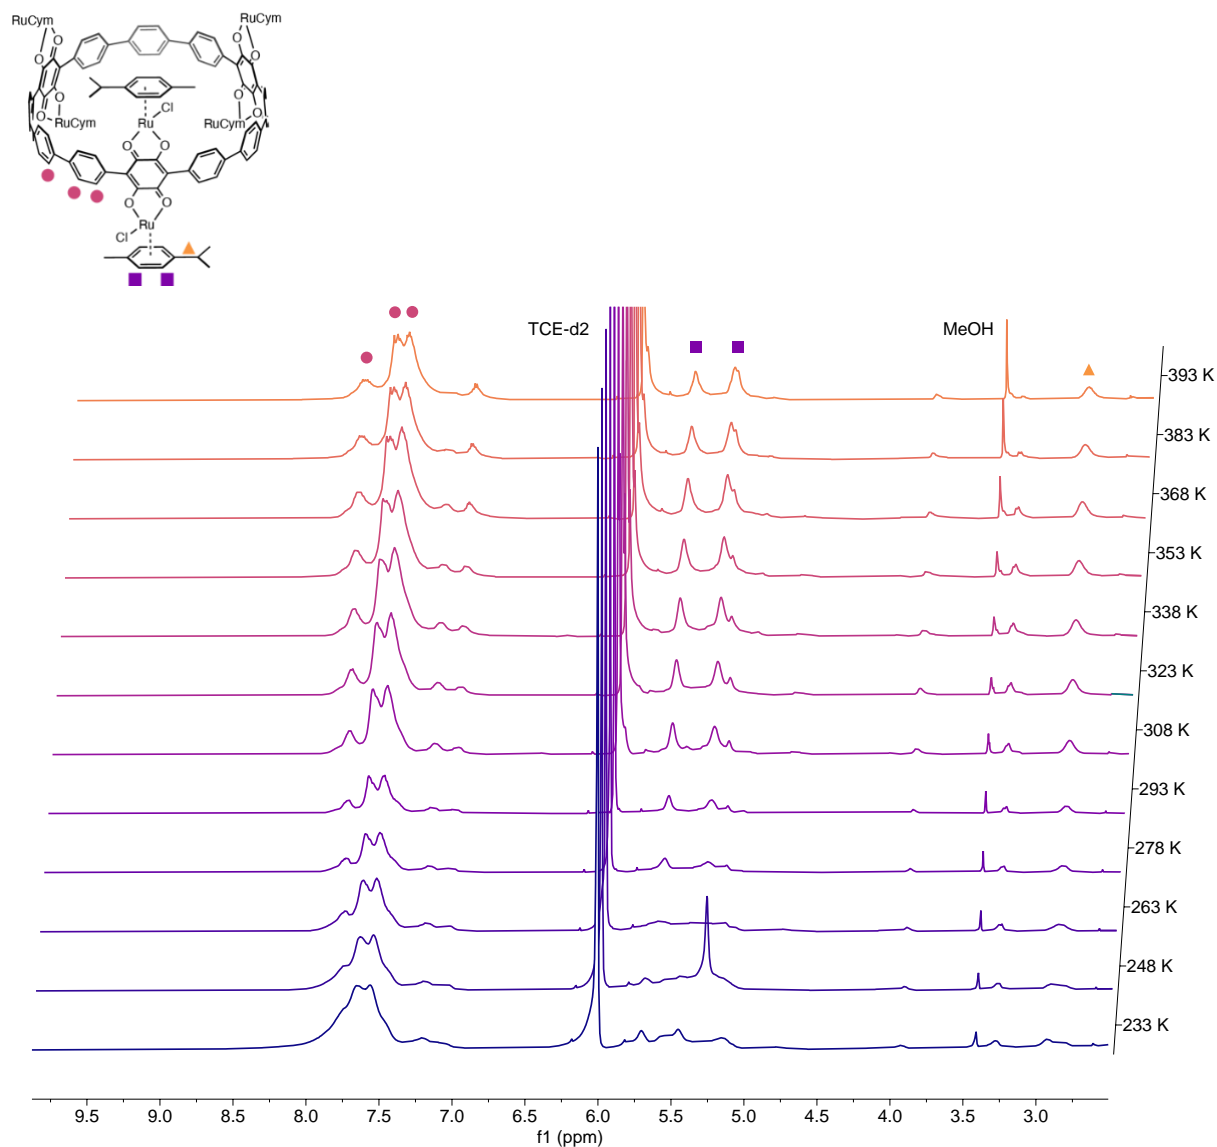

**Figure S19.** Variable-temperature  $^1\text{H}$  NMR spectrum of  **$\text{Ru}_6(12\text{O-CPP})$**  (500 MHz, tetrachloroethane- $d_2$ , 233–393 K). The sample was initially cooled to 233 K and data was collected at successively higher temperatures up to 393 K. Spectra collected at 293 K before and after collecting variable-temperature data looked identical, confirming the absence of temperature-induced decomposition or other changes during the course of the experiment.

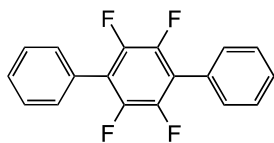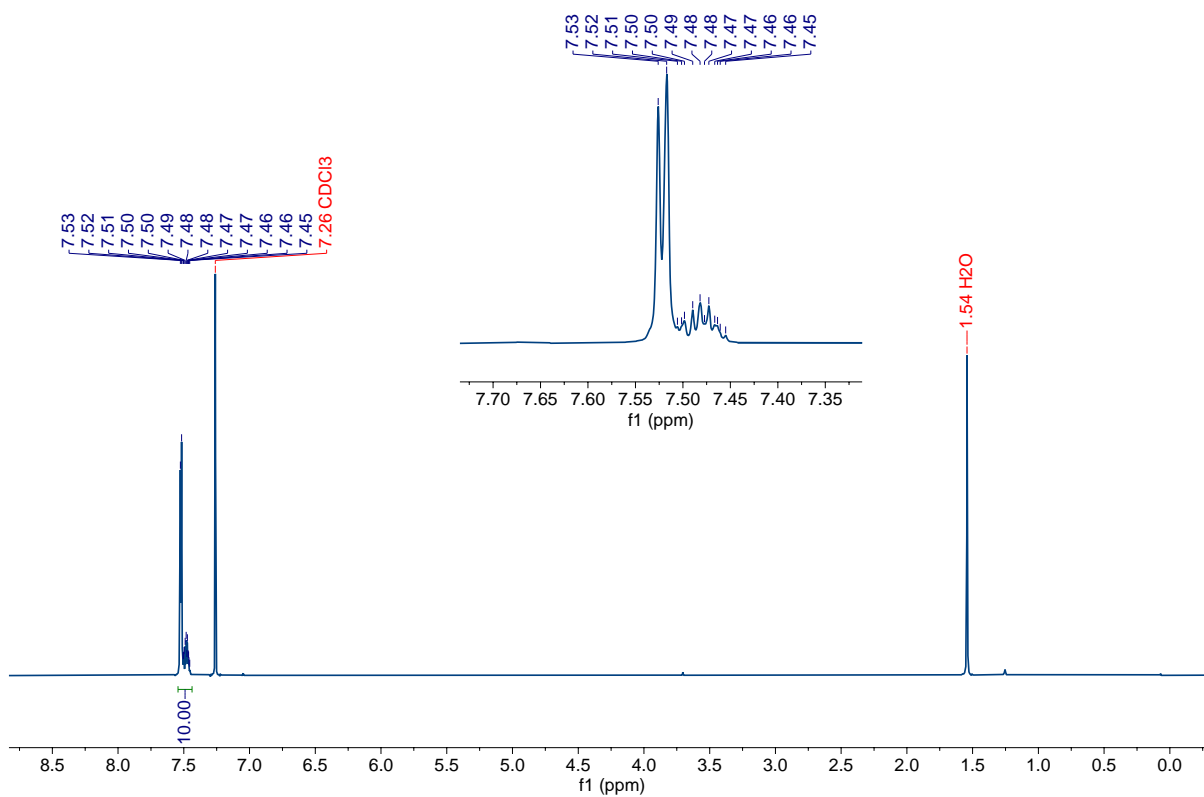

**Figure S20.**  $^1\text{H}$  NMR spectrum of 1,2,4,5-tetrafluoro-3,6-diphenylbenzene (500 MHz,  $\text{CDCl}_3$ , 298 K).

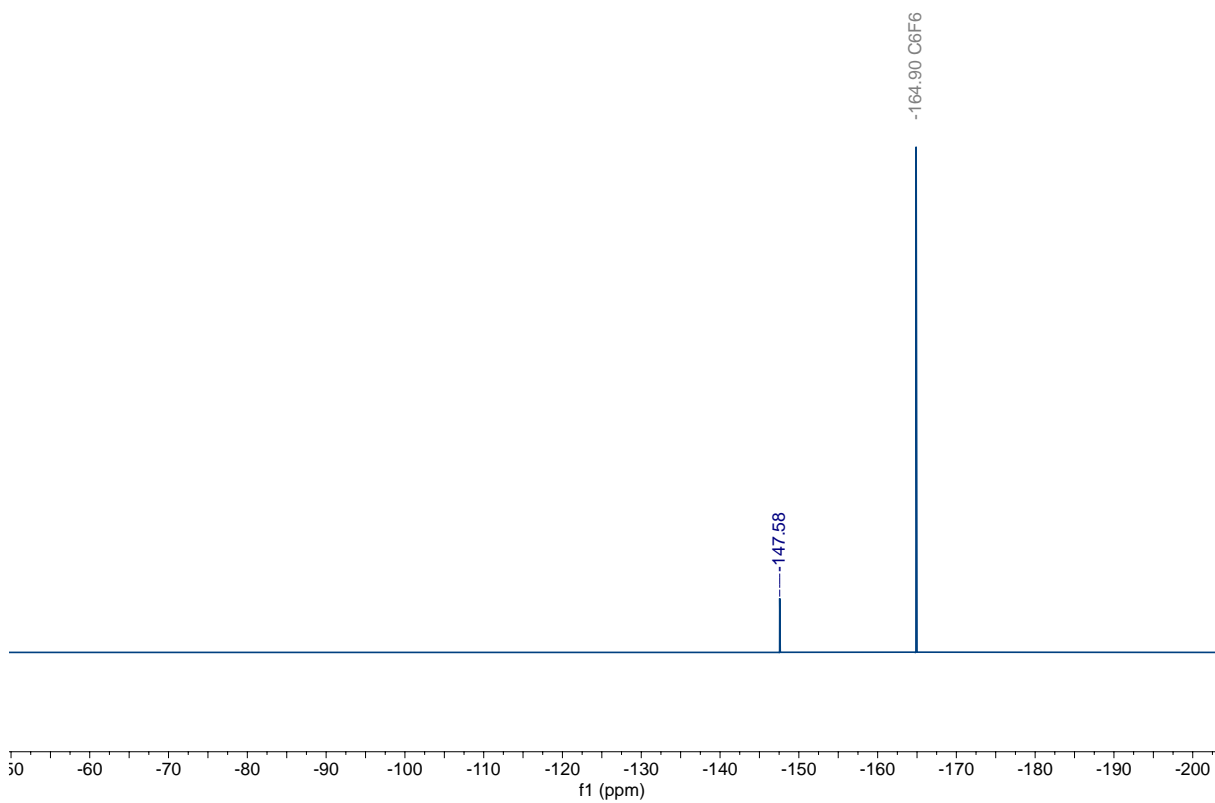

**Figure S21.**  $^{19}\text{F}\{^1\text{H}\}$  NMR spectrum of 1,2,4,5-tetrafluoro-3,6-diphenylbenzene with hexafluorobenzene as an internal chemical shift standard (470 MHz,  $\text{CDCl}_3$ , 298 K).

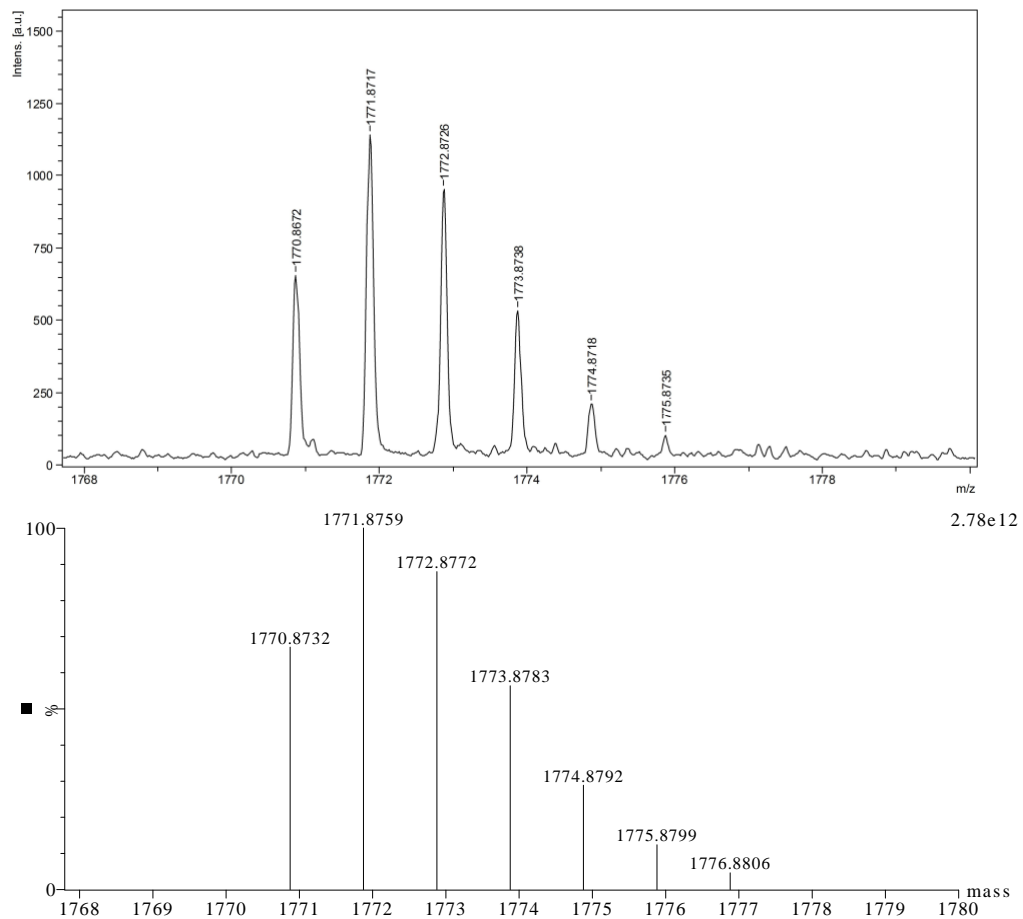

**Figure S22.** Experimental (top) *versus* simulated (bottom) high-resolution MALDI-TOF mass spectrum for **4F-MC-OTES** ( $[M]^+$ ,  $C_{108}H_{134}F_4O_6Si_6$ ).

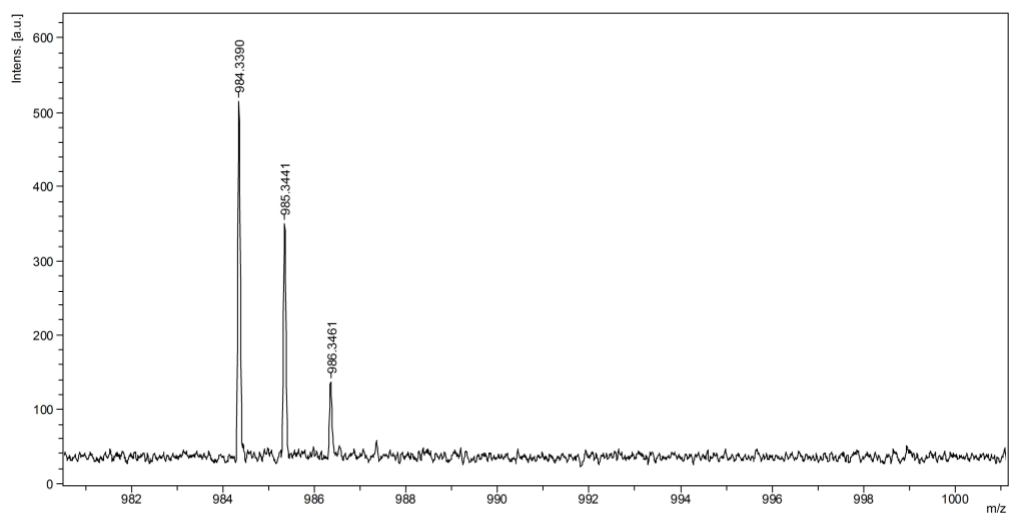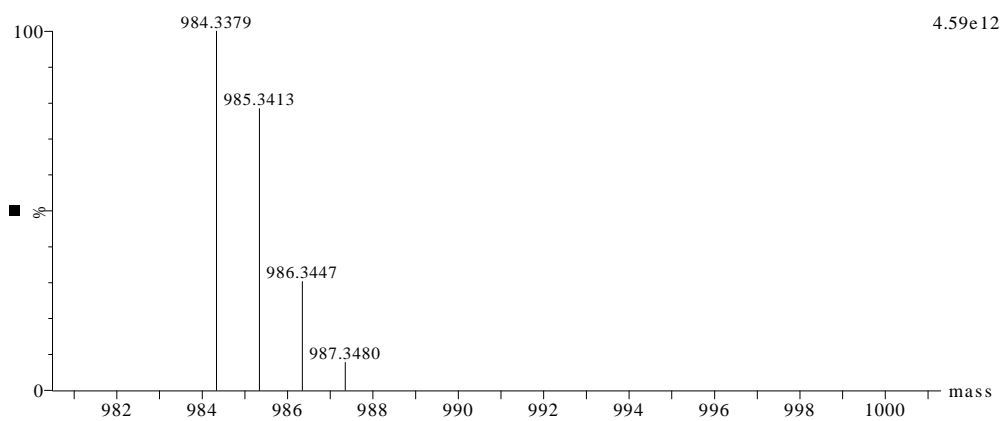

**Figure S23.** Experimental (top) *versus* simulated (bottom) high-resolution MALDI-TOF mass spectrum for **4F-CPP** ([M]<sup>+</sup>, C<sub>72</sub>H<sub>44</sub>F<sub>4</sub>).

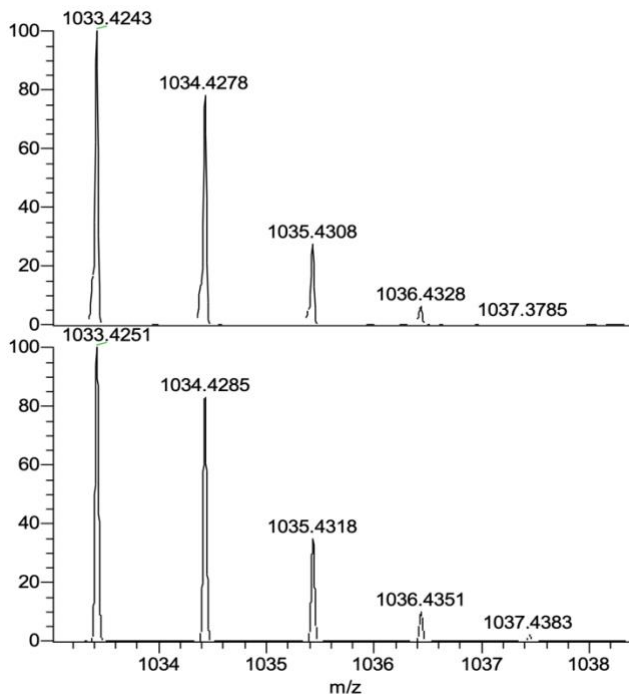

**Figure S24.** Experimental (top) *versus* simulated (bottom) high-resolution ESI mass spectrum for **4MeO-CPP** ( $[M+H]^+$ ,  $C_{76}H_{56}O_4H$ ).

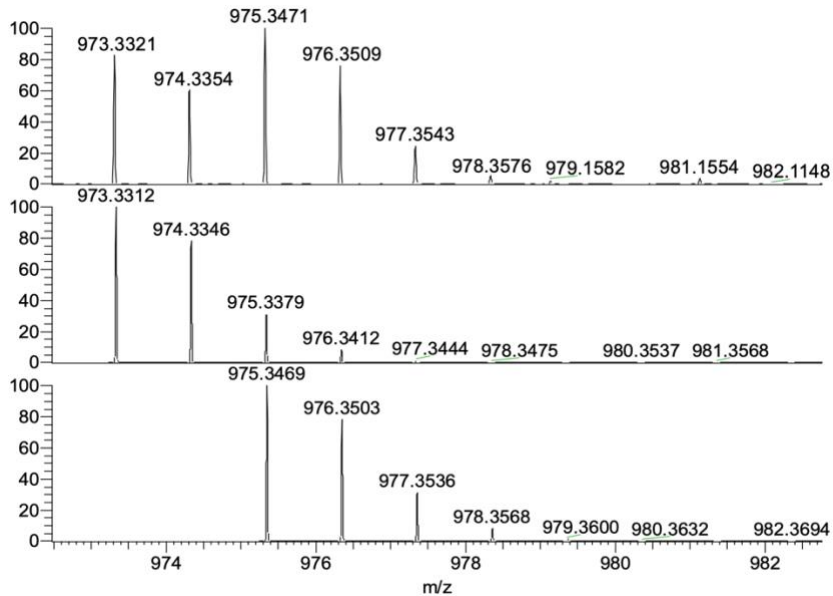

**Figure S25.** Experimental (top) *versus* simulated high-resolution ESI mass spectrum for **4HO-CPP** with the dicatchol-substituted phenylene unit in the as-synthesized form (bottom) and oxidized by air to the corresponding 2,5-dihydroxy-1,4-benzoquinone form (middle), ( $[M_{\text{unox}}-H]^-$ ,  $C_{72}H_{47}O_4$ ;  $[M_{\text{ox}}-H]^-$ ,  $C_{72}H_{45}O_4$ ). Data was collected immediately following removal of a solution of as-synthesized **4HO-CPP** from the glovebox.

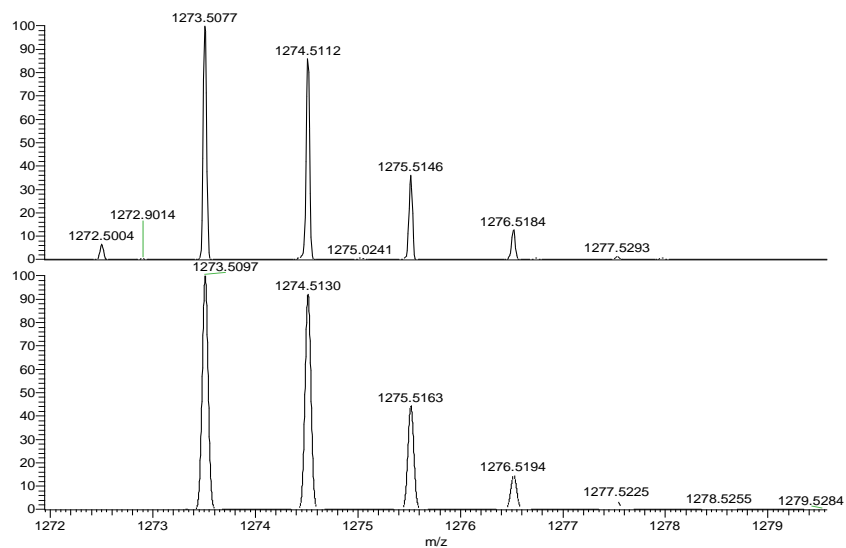

**Figure S26.** Experimental (top) *versus* simulated (bottom) high-resolution ESI mass spectrum for **12MeO-CPP** ( $[M+H]^+$ ,  $C_{84}H_{72}O_{12}H$ ).

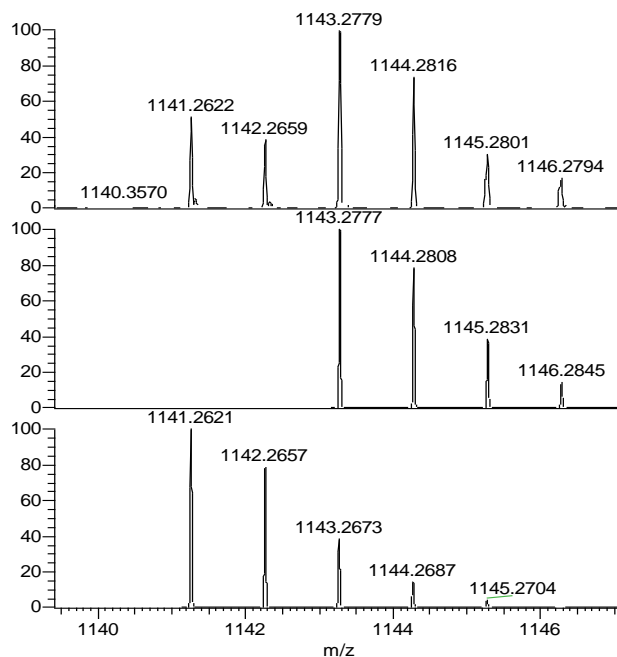

**Figure S27.** Experimental (top) *versus* simulated high-resolution ESI mass spectrum for **12HO-CPP** in the as-synthesized form (middle) and with one of the dicatechol-substituted phenylene units oxidized by air to the corresponding 2,5-dihydroxy-1,4-benzoquinone (bottom), ( $[M_{unox}+K]^+$ ,  $C_{72}H_{48}O_{12}K$ ;  $[M_{ox}+K]^+$ ,  $C_{72}H_{46}O_{12}K$ ). The addition of KCl was used to promote ionization. Data was collected immediately following removal of a solution of as-synthesized **12HO-CPP** from the glovebox.

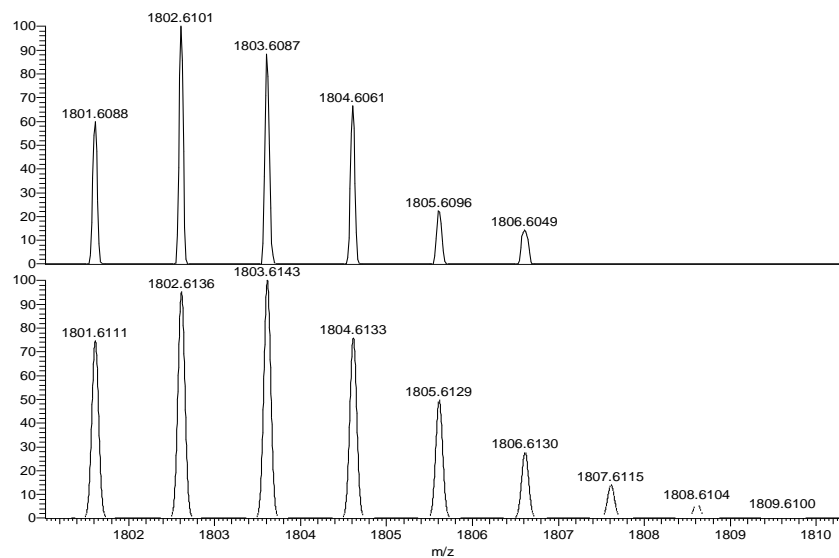

**Figure S28.** Experimental (top) *versus* simulated (bottom) high-resolution ESI mass spectrum of **12iPrS-CPP** ( $[M+H]^+$ ,  $C_{108}H_{120}S_{12}H$ ).

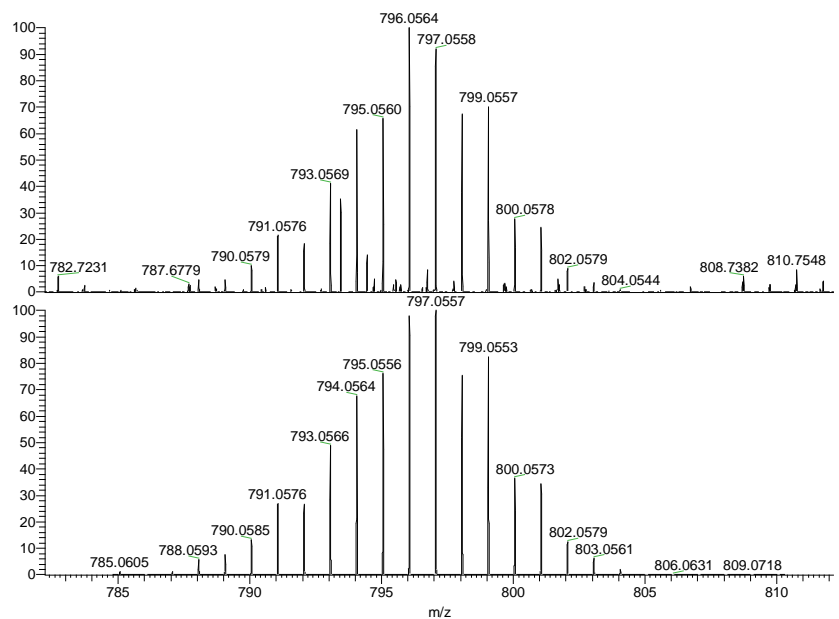

**Figure S29.** Experimental (top) *versus* simulated (bottom) high-resolution ESI mass spectrum of  **$Ru_2(Ph_2dhbq)$**  ( $[M-Cl]^+$ ,  $C_{38}H_{38}ClO_4Ru_2$ ).



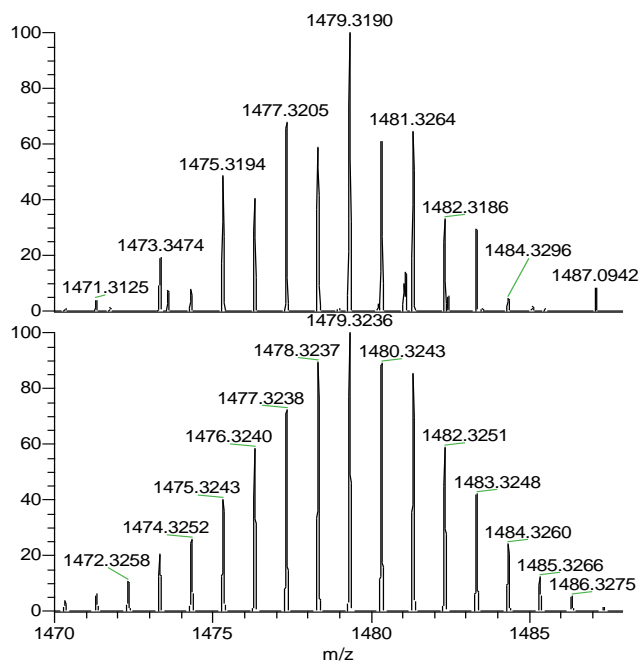

**Figure S30.** Experimental (top) *versus* simulated (bottom) high-resolution ESI mass spectrum of  $\text{Ru}_2(40\text{-CPP})$  ( $[\text{M}-\text{Cl}]^+$ ,  $\text{C}_{92}\text{H}_{72}\text{O}_4\text{ClRu}_2$ ).

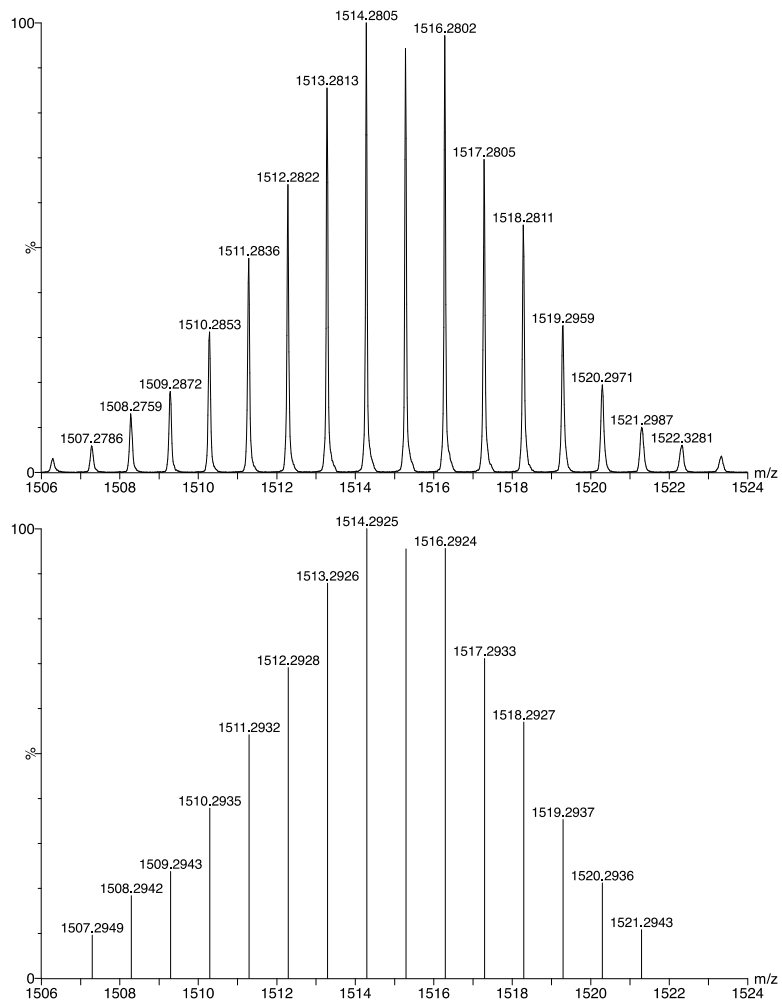

**Figure S31.** Experimental (top) *versus* simulated (bottom) high-resolution MALDI-TOF mass spectrum of  $\text{Ru}_2(40\text{-CPP})$  ( $[\text{M}]^+$ ,  $\text{C}_{92}\text{H}_{72}\text{O}_4\text{Cl}_2\text{Ru}_2$ ).

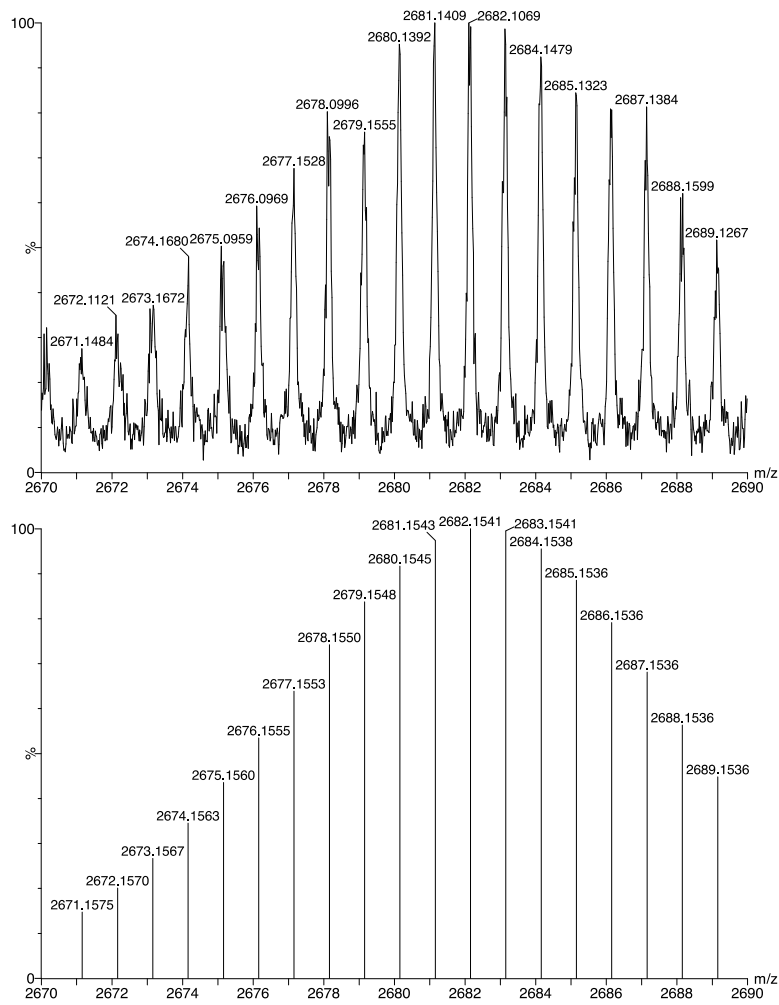

**Figure S32.** Experimental (top) *versus* simulated (bottom) high-resolution MALDI-TOF mass spectrum of  $\text{Ru}_6(12\text{O-CPP})$  ( $[\text{M}-\text{Cl}]^+$ ,  $\text{C}_{132}\text{H}_{120}\text{O}_{12}\text{Cl}_5\text{Ru}_6$ ).

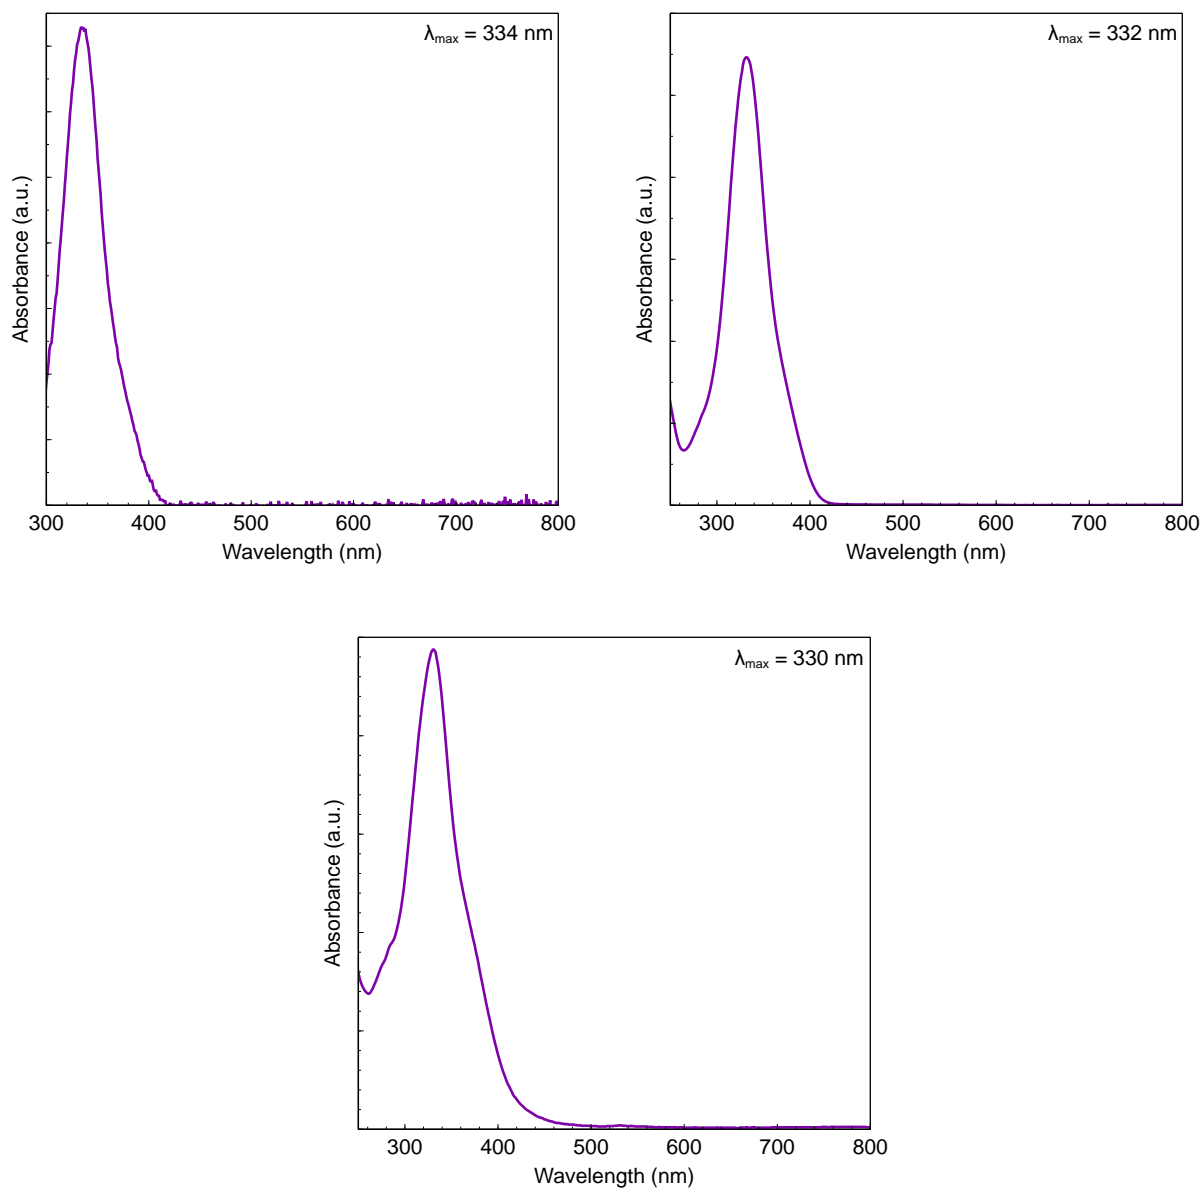

**Figure S33.** UV-vis spectra of **4F-CPP** (left), **4MeO-CPP** (right), and **4HO-CPP** (bottom) in DCM.

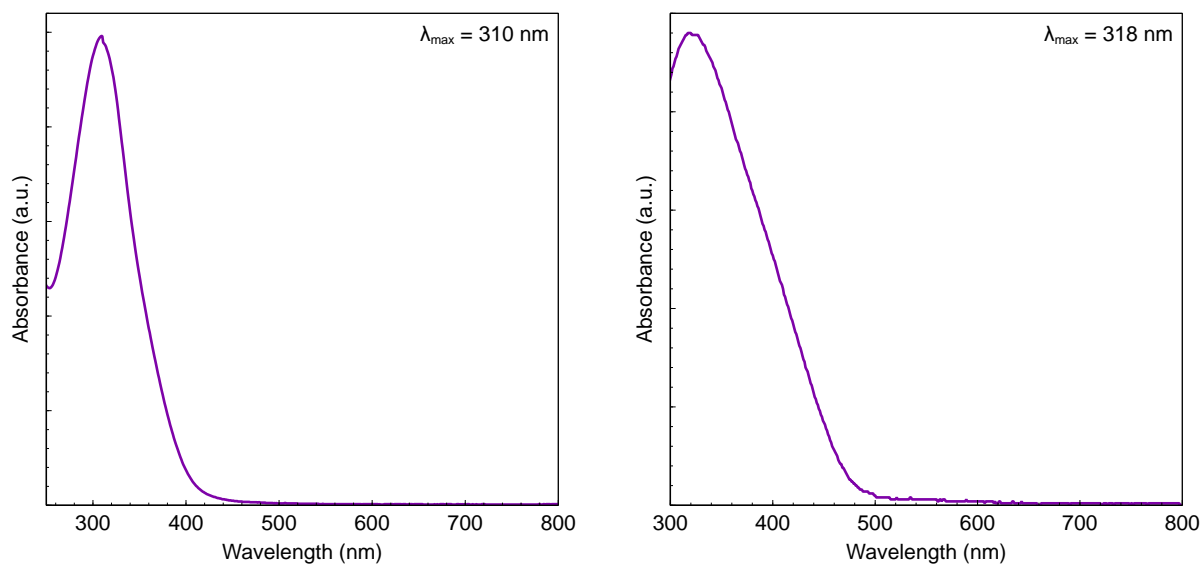

**Figure S34.** UV-vis spectra of **12MeO-CPP** (left) in DCM and **12HO-CPP** (right) in DMF.

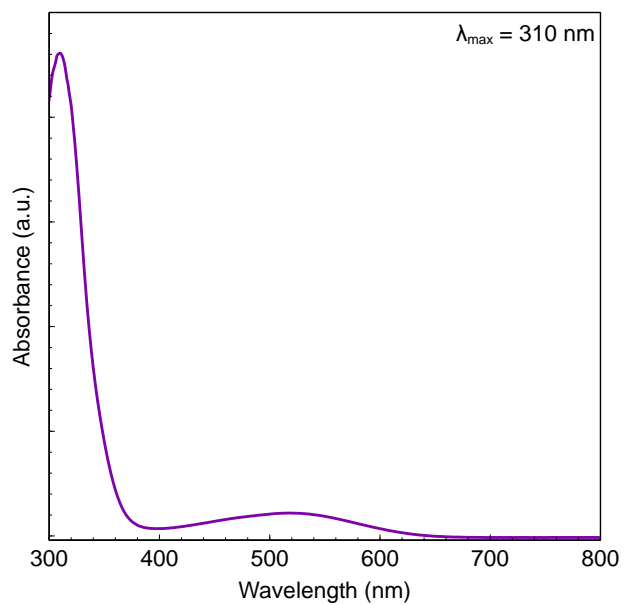

**Figure S35.** UV-vis spectrum of **H<sub>4</sub>Ph<sub>2</sub>dhdq** in DMF.

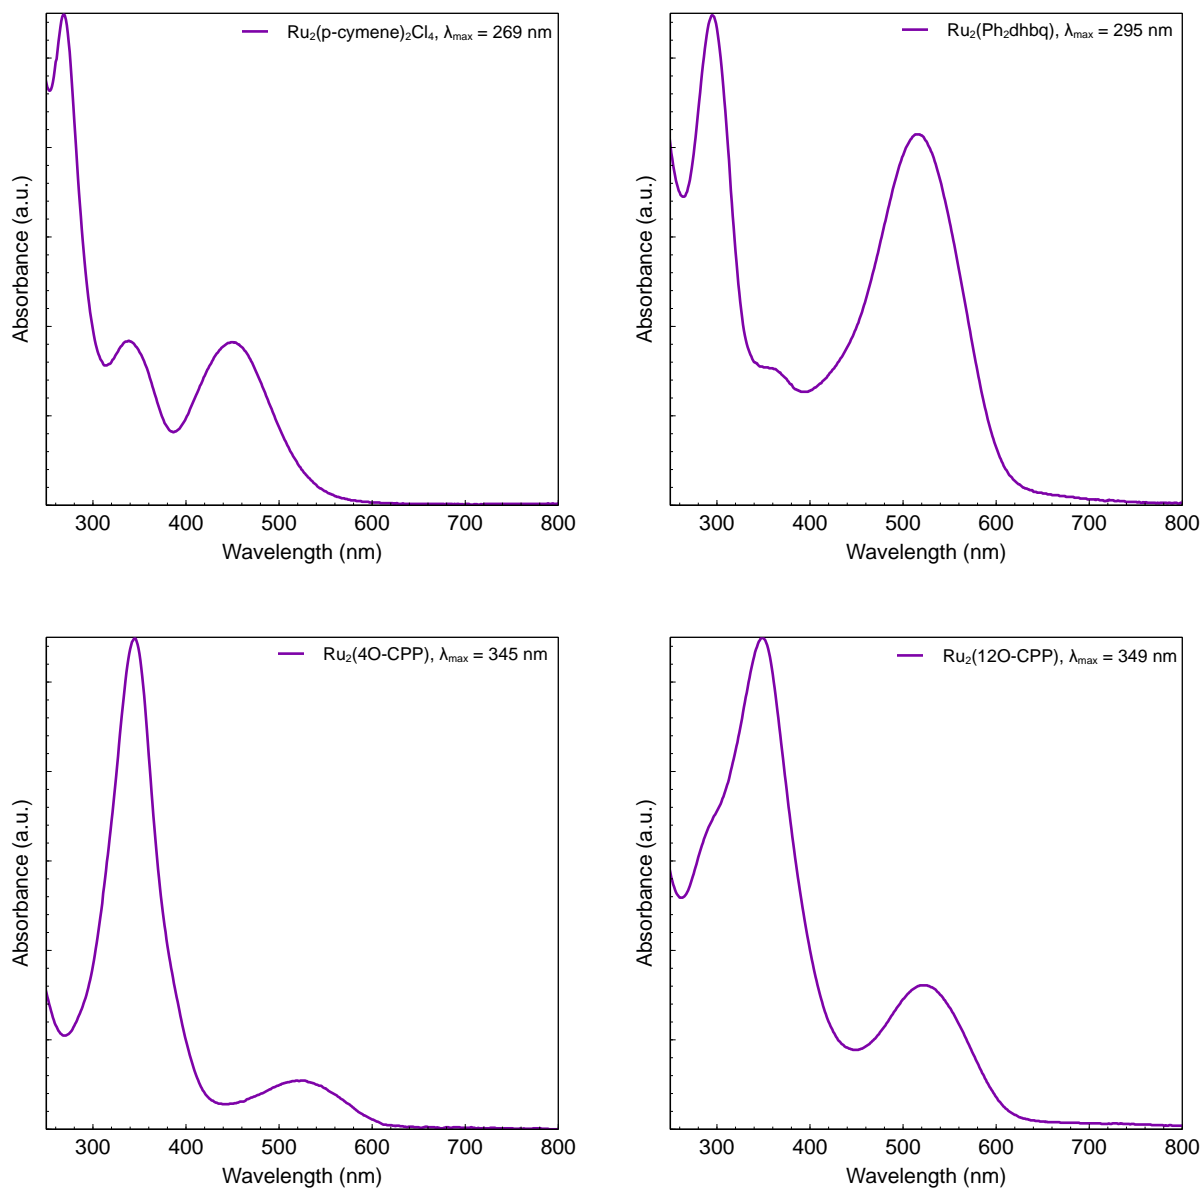

**Figure S36.** UV-vis spectra of Ru<sub>2</sub>(*p*-cymene)<sub>2</sub>Cl<sub>4</sub> (top left), Ru<sub>2</sub>(Ph<sub>2</sub>dhbq) (top right), Ru<sub>2</sub>(4O-CPP) (bottom left), and Ru<sub>2</sub>(12O-CPP) (bottom right), in DCM.

## 6. Supplementary DFT Optimized Geometries:

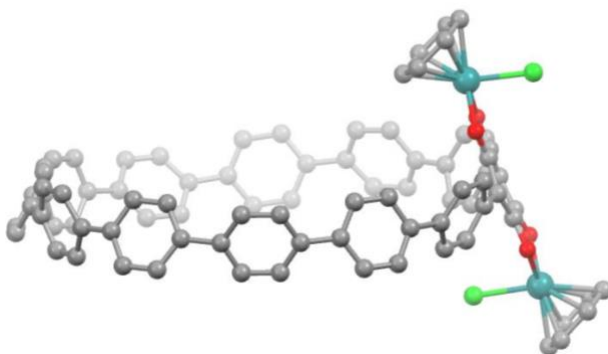

**Figure S37.** Optimized structure of **Ru<sub>2</sub>(4O-CPP)** with Cl atoms in the *trans* configuration. Protons omitted for clarity. Ru, Cl, O, and C atoms are represented as dark green, light green, red, and gray, respectively.

|            |                    |          |          |   |          |          |          |
|------------|--------------------|----------|----------|---|----------|----------|----------|
| 148        |                    |          |          | H | 1.70809  | 0.45106  | 44.69415 |
| E(RB3LYP): | -4643.8065 Hartree |          |          | C | 3.75030  | -0.23164 | 44.85639 |
| H          | 5.05268            | 6.23067  | 38.17191 | H | 5.80254  | -0.85514 | 44.61247 |
| H          | 6.55589            | 8.16412  | 38.00699 | C | 9.15547  | 8.29661  | 38.95743 |
| O          | 6.87487            | 1.95444  | 38.43014 | C | 3.76122  | -0.45180 | 46.32387 |
| C          | 5.98451            | 2.41309  | 39.22505 | C | 8.58271  | 9.43042  | 39.56053 |
| C          | 5.32191            | 1.36781  | 40.09966 | C | 10.55698 | 8.27876  | 38.83127 |
| C          | 5.66598            | 3.77857  | 39.31866 | C | 3.20965  | 0.52795  | 47.16751 |
| O          | 5.74329            | 0.17553  | 39.91102 | C | 4.49015  | -1.48672 | 46.93715 |
| C          | 4.35648            | 1.70153  | 41.06715 | H | 7.50436  | 9.48178  | 39.67974 |
| C          | 4.52908            | 4.06651  | 40.10237 | C | 9.37153  | 10.42096 | 40.13524 |
| C          | 6.57259            | 4.86030  | 38.85829 | H | 11.03691 | 7.45418  | 38.31102 |
| C          | 4.04570            | 0.84164  | 42.23714 | C | 11.34716 | 9.27178  | 39.40431 |
| C          | 3.87243            | 3.02477  | 40.98049 | H | 2.64037  | 1.34379  | 46.73122 |
| O          | 4.05786            | 5.24530  | 40.24249 | C | 3.50108  | 0.55927  | 48.52627 |
| C          | 7.95606            | 4.72527  | 39.08420 | H | 4.87879  | -2.29965 | 46.32931 |
| C          | 6.10357            | 6.10673  | 38.40699 | C | 4.76918  | -1.46351 | 48.30143 |
| C          | 2.80611            | 0.88194  | 42.90212 | H | 8.88790  | 11.21889 | 40.69119 |
| C          | 5.09008            | 0.12050  | 42.84922 | C | 10.77490 | 10.33093 | 40.13307 |
| O          | 2.94516            | 3.48234  | 41.73045 | H | 12.42825 | 9.20260  | 39.31691 |
| H          | 8.35588            | 3.77277  | 39.41702 | H | 3.15433  | 1.40586  | 49.11050 |
| C          | 8.80223            | 5.82471  | 39.00132 | C | 4.34794  | -0.39611 | 49.11782 |
| C          | 6.95848            | 7.20474  | 38.32254 | H | 5.36245  | -2.26759 | 48.72801 |
| H          | 1.96294            | 1.37592  | 42.43447 | C | 11.56636 | 11.18693 | 41.05199 |
| C          | 2.66581            | 0.35984  | 44.18724 | C | 4.93562  | -0.13180 | 50.45623 |
| H          | 6.05573            | 0.05173  | 42.35993 | C | 11.14694 | 12.47540 | 41.43334 |
| C          | 4.94132            | -0.40330 | 44.12805 | C | 12.66177 | 10.63973 | 41.74357 |
| H          | 9.84217            | 5.70585  | 39.29188 | C | 4.32874  | 0.73541  | 51.38415 |
| C          | 8.31265            | 7.10553  | 38.68592 | C | 6.24080  | -0.56481 | 50.75652 |

|   |          |          |          |    |          |          |          |
|---|----------|----------|----------|----|----------|----------|----------|
| H | 10.35247 | 12.96718 | 40.87841 | H  | 11.53720 | 4.37749  | 54.73160 |
| C | 11.69378 | 13.11435 | 42.54301 | C  | 11.55859 | 6.51520  | 54.77903 |
| H | 13.01465 | 9.64574  | 41.48543 | H  | 11.65264 | 13.52555 | 51.80906 |
| C | 13.21236 | 11.28033 | 42.84845 | C  | 12.99484 | 11.84695 | 51.58729 |
| C | 5.04826  | 1.28240  | 52.44298 | H  | 14.48343 | 10.38372 | 51.04181 |
| H | 3.29745  | 1.04420  | 51.23959 | H  | 8.86535  | 8.48762  | 55.36802 |
| H | 6.74615  | -1.25540 | 50.08852 | C  | 10.82157 | 7.71076  | 54.86896 |
| C | 6.95187  | -0.03682 | 51.82773 | H  | 12.61739 | 6.55220  | 54.54140 |
| H | 11.31321 | 14.08986 | 42.83467 | C  | 12.49599 | 11.05014 | 52.73581 |
| C | 12.69195 | 12.49833 | 43.31983 | C  | 11.40341 | 8.98365  | 54.37134 |
| H | 13.98060 | 10.77054 | 43.42265 | C  | 11.10842 | 10.92223 | 52.92049 |
| H | 4.57228  | 2.03426  | 53.06624 | C  | 13.32548 | 10.21989 | 53.51123 |
| C | 6.40534  | 0.97104  | 52.64313 | C  | 10.57637 | 9.91210  | 53.71304 |
| H | 7.97460  | -0.36472 | 51.99014 | C  | 12.79134 | 9.21607  | 54.31568 |
| C | 13.02982 | 12.95168 | 44.69208 | H  | 10.43395 | 11.54356 | 52.33852 |
| C | 7.26852  | 1.82618  | 53.49550 | H  | 14.40491 | 10.33281 | 53.45023 |
| C | 12.00500 | 13.41803 | 45.53386 | H  | 9.49989  | 9.77387  | 53.72161 |
| C | 14.29043 | 12.73162 | 45.27688 | H  | 13.46846 | 8.57290  | 54.87102 |
| C | 8.58596  | 2.08642  | 53.07696 | H  | 5.84626  | -2.48790 | 38.25570 |
| C | 6.79531  | 2.55679  | 54.60172 | C  | 6.75894  | -1.99687 | 37.93431 |
| H | 11.01616 | 13.59664 | 45.12161 | C  | 6.71559  | -1.08333 | 36.84625 |
| C | 12.18714 | 13.51126 | 46.90911 | H  | 5.78420  | -0.89235 | 36.32616 |
| H | 15.12817 | 12.43758 | 44.64992 | C  | 7.87499  | -0.31184 | 36.55508 |
| C | 14.47440 | 12.83167 | 46.65362 | H  | 7.81473  | 0.48578  | 35.82191 |
| H | 8.98786  | 1.56357  | 52.21517 | C  | 9.09076  | -0.51431 | 37.26908 |
| C | 9.34335  | 3.09684  | 53.65176 | C  | 9.11955  | -1.46297 | 38.32636 |
| H | 5.80541  | 2.34944  | 54.99976 | H  | 9.99956  | -1.53003 | 38.95552 |
| C | 7.55577  | 3.57363  | 55.17840 | C  | 7.96500  | -2.21656 | 38.66262 |
| H | 11.33319 | 13.75778 | 47.53277 | H  | 7.97329  | -2.87650 | 39.52135 |
| C | 13.40491 | 13.14880 | 47.51217 | H  | 9.95120  | 0.11396  | 37.07454 |
| H | 15.45415 | 12.61692 | 47.07182 | Ru | 7.43711  | -0.02749 | 38.71795 |
| H | 10.31150 | 3.32954  | 53.22008 | Cl | 8.65075  | 0.80270  | 40.64494 |
| C | 8.82807  | 3.90828  | 54.67859 | H  | -0.20229 | 5.26796  | 42.99723 |
| H | 7.14013  | 4.13502  | 56.01124 | C  | 0.64322  | 5.91416  | 42.79614 |
| C | 13.44740 | 12.88820 | 48.97340 | C  | 0.60008  | 6.83610  | 41.71711 |
| C | 9.54422  | 5.16317  | 55.01797 | H  | -0.27412 | 6.86368  | 41.07696 |
| C | 12.58942 | 13.53933 | 49.88006 | C  | 1.73854  | 7.61034  | 41.37320 |
| C | 14.19214 | 11.80156 | 49.46579 | H  | 1.72217  | 8.24773  | 40.49774 |
| C | 8.83705  | 6.35104  | 55.27827 | C  | 2.94174  | 7.44170  | 42.12045 |
| C | 10.93803 | 5.27406  | 54.86244 | C  | 2.99654  | 6.56105  | 43.23456 |
| H | 12.05341 | 14.43121 | 49.56694 | H  | 3.92622  | 6.40996  | 43.77057 |
| C | 12.36393 | 13.02774 | 51.15502 | C  | 1.85695  | 5.76294  | 43.52827 |
| H | 14.86525 | 11.26835 | 48.80120 | H  | 1.93144  | 4.98502  | 44.28102 |
| C | 13.97419 | 11.29550 | 50.74300 | H  | 3.84535  | 7.94733  | 41.79611 |
| H | 7.76274  | 6.31229  | 55.43524 | Ru | 2.32758  | 5.43625  | 41.37838 |
| C | 9.46260  | 7.59313  | 55.21561 | Cl | 1.17189  | 4.54282  | 39.45532 |



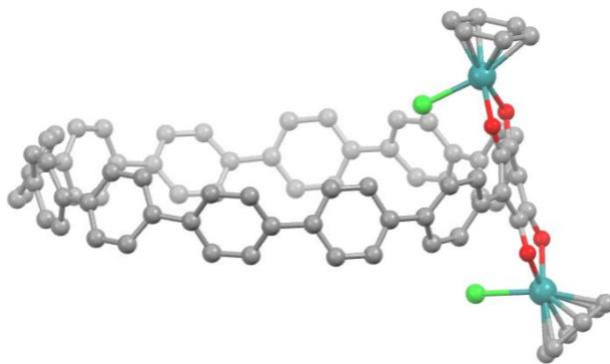

**Figure S38.** Optimized structure of **Ru<sub>2</sub>(40-CPP)** with Cl atoms in the *cis* configuration, both pointing inwards. Protons omitted for clarity. Ru, Cl, O, and C atoms are represented as dark green, light green, red, and gray, respectively.

|            |                    |          |          |   |          |          |          |
|------------|--------------------|----------|----------|---|----------|----------|----------|
| 148        |                    |          |          | H | 5.78919  | -0.78016 | 44.66151 |
| E(RB3LYP): | -4643.8018 Hartree |          |          | C | 9.13363  | 8.33974  | 39.09169 |
| H          | 5.02205            | 6.31393  | 38.26217 | C | 3.78822  | -0.33977 | 46.41097 |
| H          | 6.53574            | 8.23899  | 38.13974 | C | 8.57365  | 9.46057  | 39.72949 |
| O          | 6.87881            | 2.01583  | 38.53496 | C | 10.53220 | 8.32005  | 38.93902 |
| C          | 5.96132            | 2.46909  | 39.30215 | C | 3.28963  | 0.66583  | 47.25692 |
| C          | 5.29797            | 1.42391  | 40.17404 | C | 4.49181  | -1.39697 | 47.01525 |
| C          | 5.61575            | 3.83170  | 39.36740 | H | 7.49866  | 9.50669  | 39.87691 |
| O          | 5.74618            | 0.23750  | 40.00929 | C | 9.37583  | 10.43956 | 40.30563 |
| C          | 4.30198            | 1.75034  | 41.11627 | H | 10.99961 | 7.50261  | 38.39635 |
| C          | 4.42057            | 4.08871  | 40.07062 | C | 11.33537 | 9.30205  | 39.51314 |
| C          | 6.52658            | 4.92023  | 38.93480 | H | 2.75005  | 1.50351  | 46.82467 |
| C          | 4.00227            | 0.91059  | 42.30293 | C | 3.60372  | 0.69068  | 48.61079 |
| C          | 3.75892            | 3.04247  | 40.94743 | H | 4.84215  | -2.22453 | 46.40366 |
| O          | 3.83175            | 5.22187  | 40.06914 | C | 4.79324  | -1.37928 | 48.37499 |
| C          | 7.90817            | 4.77606  | 39.17228 | H | 8.90514  | 11.22533 | 40.88917 |
| C          | 6.07013            | 6.17673  | 38.49876 | C | 10.77873 | 10.34957 | 40.27006 |
| C          | 2.77945            | 0.97426  | 42.99701 | H | 12.41455 | 9.23307  | 39.40397 |
| C          | 5.05073            | 0.18337  | 42.90348 | H | 3.30179  | 1.55344  | 49.19616 |
| O          | 2.70911            | 3.45316  | 41.54819 | C | 4.42081  | -0.29558 | 49.19329 |
| H          | 8.30100            | 3.82006  | 39.50151 | H | 5.36476  | -2.20183 | 48.79631 |
| C          | 8.76083            | 5.87084  | 39.10986 | C | 11.59077 | 11.19373 | 41.18194 |
| C          | 6.93136            | 7.27129  | 38.43816 | C | 5.02966  | -0.05233 | 50.52608 |
| H          | 1.93431            | 1.48035  | 42.54860 | C | 11.18339 | 12.48005 | 41.58269 |
| C          | 2.66146            | 0.47062  | 44.29149 | C | 12.69849 | 10.63723 | 41.84580 |
| H          | 6.00701            | 0.10009  | 42.39992 | C | 4.45049  | 0.82020  | 51.46638 |
| C          | 4.92284            | -0.32426 | 44.19027 | C | 6.32817  | -0.51569 | 50.80894 |
| H          | 9.79722            | 5.74269  | 39.40888 | H | 10.37768 | 12.97773 | 41.04964 |
| C          | 8.28198            | 7.15846  | 38.80679 | C | 11.75624 | 13.10866 | 42.68505 |
| H          | 1.71895            | 0.58773  | 44.82094 | H | 13.04145 | 9.64373  | 41.57283 |
| C          | 3.75068            | -0.12973 | 44.94260 | C | 13.27475 | 11.26733 | 42.94367 |

|   |          |          |          |    |          |          |          |
|---|----------|----------|----------|----|----------|----------|----------|
| C | 5.19118  | 1.34104  | 52.52374 | C  | 13.23932 | 11.78430 | 51.68875 |
| H | 3.42557  | 1.15392  | 51.33214 | H  | 14.70322 | 10.31148 | 51.10372 |
| H | 6.81172  | -1.20991 | 50.12853 | H  | 9.14172  | 8.43272  | 55.50798 |
| C | 7.06069  | -0.01270 | 51.87789 | C  | 11.08007 | 7.63953  | 54.96678 |
| H | 11.38462 | 14.08263 | 42.99298 | H  | 12.85614 | 6.46429  | 54.59422 |
| C | 12.76921 | 12.48368 | 43.43501 | C  | 12.75342 | 10.98274 | 52.83954 |
| H | 14.05251 | 10.75001 | 43.49798 | C  | 11.66752 | 8.91157  | 54.47363 |
| H | 4.73821  | 2.09812  | 53.15775 | C  | 11.36804 | 10.86793 | 53.04785 |
| C | 6.54260  | 0.99757  | 52.70861 | C  | 13.58742 | 10.13601 | 53.59197 |
| H | 8.07843  | -0.36208 | 52.02672 | C  | 10.83918 | 9.85564  | 53.83965 |
| C | 13.13865 | 12.92671 | 44.80249 | C  | 13.05669 | 9.12976  | 54.39576 |
| C | 7.43038  | 1.82532  | 53.56270 | H  | 10.69002 | 11.50140 | 52.48344 |
| C | 12.13423 | 13.39215 | 45.66899 | H  | 14.66680 | 10.23760 | 53.51245 |
| C | 14.41082 | 12.69841 | 45.35842 | H  | 9.76164  | 9.72839  | 53.86500 |
| C | 8.74620  | 2.07123  | 53.13085 | H  | 13.73648 | 8.47328  | 54.93200 |
| C | 6.98298  | 2.54581  | 54.68609 | H  | 5.94641  | -2.46161 | 38.40222 |
| H | 11.13699 | 13.57538 | 45.27978 | C  | 6.85152  | -1.95159 | 38.08908 |
| C | 12.34688 | 13.47755 | 47.04031 | C  | 6.80488  | -1.05745 | 36.98475 |
| H | 15.23330 | 12.40396 | 44.71172 | H  | 5.87914  | -0.90056 | 36.44363 |
| C | 14.62525 | 12.79009 | 46.73138 | C  | 7.94878  | -0.26071 | 36.70230 |
| H | 9.12800  | 1.55580  | 52.25552 | H  | 7.88253  | 0.52296  | 35.95472 |
| C | 9.52643  | 3.06141  | 53.71046 | C  | 9.15685  | -0.42134 | 37.44036 |
| H | 5.99482  | 2.34792  | 55.09325 | C  | 9.19092  | -1.35254 | 38.51233 |
| C | 7.76655  | 3.54189  | 55.26791 | H  | 10.06089 | -1.38730 | 39.15780 |
| H | 11.50753 | 13.72293 | 47.68389 | C  | 8.04944  | -2.12960 | 38.84110 |
| C | 13.57619 | 13.10742 | 47.61459 | H  | 8.05911  | -2.77509 | 39.71072 |
| H | 15.61277 | 12.56831 | 47.12719 | H  | 10.00446 | 0.22566  | 37.25095 |
| H | 10.49174 | 3.28660  | 53.26856 | Ru | 7.46785  | 0.04618  | 38.85374 |
| C | 9.03695  | 3.86509  | 54.75588 | Cl | 8.62716  | 0.91364  | 40.79147 |
| H | 7.37031  | 4.09717  | 56.11422 | H  | -0.35877 | 4.22492  | 41.66089 |
| C | 13.64840 | 12.83879 | 49.07316 | C  | 0.11409  | 5.19594  | 41.55634 |
| C | 9.77450  | 5.10554  | 55.10252 | C  | 0.40616  | 5.69545  | 40.25789 |
| C | 12.81522 | 13.49183 | 50.00129 | H  | 0.14255  | 5.12271  | 39.37642 |
| C | 14.39380 | 11.74292 | 49.54356 | C  | 1.18612  | 6.87814  | 40.14276 |
| C | 9.08630  | 6.29811  | 55.39076 | H  | 1.53440  | 7.19507  | 39.16518 |
| C | 11.16695 | 5.20193  | 54.92645 | C  | 1.57893  | 7.61645  | 41.29736 |
| H | 12.28023 | 14.38983 | 49.70429 | C  | 1.23290  | 7.12153  | 42.58210 |
| C | 12.61106 | 12.97391 | 51.27725 | H  | 1.63687  | 7.60499  | 43.46389 |
| H | 15.04800 | 11.20791 | 48.86171 | C  | 0.49560  | 5.91673  | 42.72549 |
| C | 14.19698 | 11.23022 | 50.82159 | H  | 0.31072  | 5.50311  | 43.70916 |
| H | 8.01413  | 6.27029  | 55.56371 | H  | 2.21391  | 8.48840  | 41.20054 |
| C | 9.72576  | 7.53333  | 55.33467 | Ru | 2.32085  | 5.49966  | 41.47643 |
| H | 11.75295 | 4.30020  | 54.77320 | Cl | 4.10494  | 5.70535  | 43.08041 |
| C | 11.80111 | 6.43665  | 54.84937 |    |          |          |          |
| H | 11.91704 | 13.47325 | 51.94846 |    |          |          |          |



|   |          |          |          |    |          |          |          |
|---|----------|----------|----------|----|----------|----------|----------|
| H | 6.69630  | -1.32031 | 50.09872 | C  | 13.00395 | 11.79816 | 51.49014 |
| C | 6.93535  | -0.09913 | 51.83260 | H  | 14.48739 | 10.34244 | 50.91146 |
| H | 11.19622 | 14.12137 | 42.78865 | H  | 8.93375  | 8.42697  | 55.32205 |
| C | 12.59730 | 12.53697 | 43.23178 | C  | 10.87945 | 7.64623  | 54.78913 |
| H | 13.90564 | 10.82188 | 43.28988 | H  | 12.66723 | 6.48419  | 54.43141 |
| H | 4.59061  | 1.99761  | 53.09443 | C  | 12.52256 | 10.99203 | 52.63959 |
| C | 6.40825  | 0.91620  | 52.65155 | C  | 11.45484 | 8.91872  | 54.28315 |
| H | 7.95659  | -0.43674 | 51.98438 | C  | 11.13798 | 10.86334 | 52.84504 |
| C | 12.95027 | 12.97502 | 44.60524 | C  | 13.36379 | 10.15700 | 53.39702 |
| C | 7.28909  | 1.76720  | 53.48991 | C  | 10.61802 | 9.84999  | 53.64141 |
| C | 11.93355 | 13.42584 | 45.46517 | C  | 12.84191 | 9.14980  | 54.20532 |
| C | 14.21898 | 12.75407 | 45.17200 | H  | 10.45469 | 11.48810 | 52.27721 |
| C | 8.60181  | 2.01867  | 53.05170 | H  | 14.44216 | 10.26993 | 53.31974 |
| C | 6.83584  | 2.50405  | 54.60031 | H  | 9.54170  | 9.71271  | 53.66706 |
| H | 10.93885 | 13.60467 | 45.06745 | H  | 13.52739 | 8.50401  | 54.74720 |
| C | 12.13215 | 13.50382 | 46.83902 | H  | 6.95751  | -2.11566 | 36.11814 |
| H | 15.05070 | 12.47247 | 44.53146 | C  | 7.57889  | -1.75441 | 36.92932 |
| C | 14.41926 | 12.83826 | 46.54758 | C  | 8.42696  | -0.63475 | 36.71048 |
| H | 8.98860  | 1.48971  | 52.18666 | H  | 8.47377  | -0.16707 | 35.73484 |
| C | 9.37230  | 3.02800  | 53.61096 | C  | 9.11150  | -0.05945 | 37.81865 |
| H | 5.85089  | 2.30314  | 55.01362 | H  | 9.67635  | 0.85607  | 37.67665 |
| C | 7.60966  | 3.51926  | 55.16170 | C  | 9.00749  | -0.62430 | 39.12079 |
| H | 11.28498 | 13.73933 | 47.47602 | C  | 8.11469  | -1.70981 | 39.32169 |
| C | 13.35895 | 13.14033 | 47.42277 | H  | 7.91695  | -2.06106 | 40.32910 |
| H | 15.40509 | 12.62361 | 46.95132 | C  | 7.41717  | -2.30301 | 38.22632 |
| H | 10.33529 | 3.25400  | 53.16440 | H  | 6.70258  | -3.09840 | 38.39891 |
| C | 8.87566  | 3.84661  | 54.64128 | H  | 9.50674  | -0.15948 | 39.96295 |
| H | 7.20906  | 4.08557  | 55.99851 | Ru | 6.94195  | -0.10394 | 38.31432 |
| C | 13.42043 | 12.86469 | 48.88053 | Cl | 4.91466  | 0.09312  | 37.03160 |
| C | 9.60051  | 5.10090  | 54.96415 | H  | -0.09067 | 5.34417  | 43.28500 |
| C | 12.57324 | 13.50571 | 49.80434 | C  | 0.76445  | 5.97274  | 43.06918 |
| C | 14.17299 | 11.77443 | 49.35255 | C  | 0.70935  | 6.91927  | 42.01203 |
| C | 8.90010  | 6.29047  | 55.23483 | H  | -0.18478 | 6.98322  | 41.40281 |
| C | 10.99147 | 5.20925  | 54.78325 | C  | 1.85626  | 7.66930  | 41.64453 |
| H | 12.03206 | 14.39977 | 49.50675 | H  | 1.82768  | 8.32481  | 40.78288 |
| C | 12.36556 | 12.98190 | 51.07730 | C  | 3.07918  | 7.45353  | 42.34698 |
| H | 14.83850 | 11.24910 | 48.67411 | C  | 3.14719  | 6.54982  | 43.44128 |
| C | 13.97255 | 11.25590 | 50.62770 | H  | 4.08933  | 6.36502  | 43.94395 |
| H | 7.82874  | 6.25403  | 55.41118 | C  | 1.99760  | 5.77426  | 43.75605 |
| C | 9.52655  | 7.53132  | 55.15959 | H  | 2.07597  | 4.97902  | 44.49008 |
| H | 11.58696 | 4.31154  | 54.64369 | H  | 3.98426  | 7.94300  | 42.00257 |
| C | 11.61258 | 6.44925  | 54.68717 | Ru | 2.38422  | 5.48146  | 41.58402 |
| H | 11.66280 | 13.47280 | 51.74558 | Cl | 1.12932  | 4.66403  | 39.69744 |

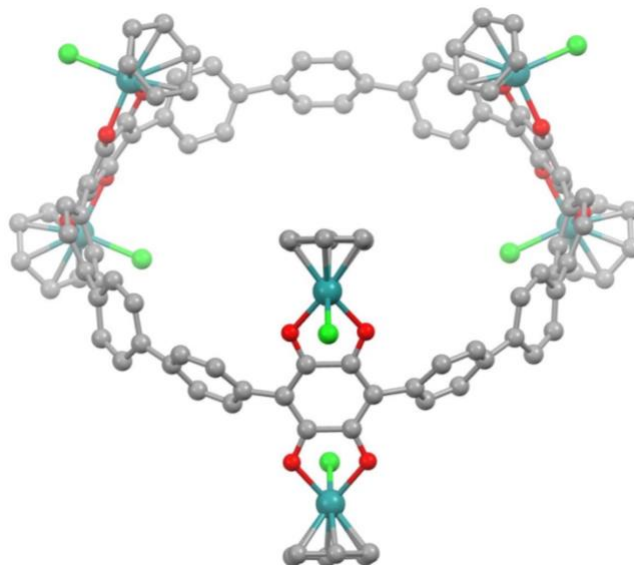

**Figure S40.** Optimized structure of **Ru<sub>6</sub>(12O-CPP)** with Cl atoms in the higher symmetry configuration (contains a C<sub>3</sub> axis of rotation). Protons omitted for clarity. Ru, Cl, O, and C atoms are represented as dark green, light green, red, and gray, respectively.

|            |                    |          |          |   |          |          |          |
|------------|--------------------|----------|----------|---|----------|----------|----------|
| 204        |                    |          |          | H | 6.48920  | 0.23357  | 42.33054 |
| E(RB3LYP): | -8386.3157 Hartree |          |          | C | 5.45368  | -0.42849 | 44.08089 |
| H          | 4.76727            | 6.28397  | 38.30000 | H | 9.60699  | 6.13607  | 39.30839 |
| H          | 6.09649            | 8.34358  | 38.17083 | C | 7.95305  | 7.41889  | 38.77543 |
| O          | 6.99090            | 2.17968  | 38.37793 | H | 2.12175  | -0.11880 | 44.63397 |
| C          | 6.07468            | 2.52484  | 39.20002 | C | 4.24608  | -0.47437 | 44.80170 |
| C          | 5.54462            | 1.39643  | 40.06113 | H | 6.37510  | -0.74641 | 44.56000 |
| C          | 5.62017            | 3.84831  | 39.33754 | C | 8.70837  | 8.66581  | 39.05417 |
| O          | 6.09000            | 0.26109  | 39.84262 | C | 4.27929  | -0.76694 | 46.25646 |
| C          | 4.56596            | 1.60497  | 41.04914 | C | 8.07118  | 9.74618  | 39.68996 |
| C          | 4.46706            | 3.99301  | 40.13666 | C | 10.10458 | 8.74885  | 38.89926 |
| C          | 6.41393            | 5.02621  | 38.90507 | C | 3.48981  | -0.01330 | 47.14312 |
| C          | 4.38007            | 0.69688  | 42.20907 | C | 5.22912  | -1.63476 | 46.82658 |
| C          | 3.93718            | 2.86630  | 40.99552 | H | 6.99421  | 9.72031  | 39.83072 |
| O          | 3.87274            | 5.11081  | 40.31045 | C | 8.80236  | 10.77982 | 40.26699 |
| C          | 7.80831            | 5.00534  | 39.10287 | H | 10.62945 | 7.96965  | 38.35313 |
| C          | 5.82990            | 6.24288  | 38.51010 | C | 10.83603 | 9.78290  | 39.47651 |
| C          | 3.14855            | 0.53502  | 42.86834 | H | 2.74578  | 0.66999  | 46.74323 |
| C          | 5.52288            | 0.13954  | 42.81513 | C | 3.73501  | -0.01745 | 48.51274 |
| O          | 2.97375            | 3.20060  | 41.76570 | H | 5.81290  | -2.28654 | 46.18217 |
| H          | 8.29647            | 4.08183  | 39.39670 | C | 5.47445  | -1.63888 | 48.19672 |
| C          | 8.55498            | 6.17509  | 39.04118 | H | 8.27905  | 11.53659 | 40.84474 |
| C          | 6.58663            | 7.41286  | 38.44608 | C | 10.20826 | 10.78616 | 40.23783 |
| H          | 2.24079            | 0.90655  | 42.40689 | H | 11.91743 | 9.79041  | 39.36959 |
| C          | 3.08590            | -0.04037 | 44.13746 | H | 3.17670  | 0.66271  | 49.14995 |

|   |          |          |          |    |          |          |          |
|---|----------|----------|----------|----|----------|----------|----------|
| C | 4.78230  | -0.77544 | 49.06602 | C  | 8.92553  | 6.20242  | 55.82026 |
| H | 6.24493  | -2.29372 | 48.59476 | C  | 10.57579 | 4.97123  | 54.57215 |
| C | 10.96510 | 11.67675 | 41.15274 | H  | 11.89434 | 14.55729 | 50.04177 |
| C | 5.25621  | -0.49110 | 50.44355 | C  | 12.25578 | 12.92607 | 51.38871 |
| C | 10.50180 | 12.94715 | 41.53621 | H  | 14.36022 | 11.36251 | 48.55154 |
| C | 12.08946 | 11.17158 | 41.83140 | C  | 13.64628 | 11.15540 | 50.55702 |
| C | 4.39888  | -0.06231 | 51.47153 | H  | 8.00192  | 6.24045  | 56.38639 |
| C | 6.63896  | -0.44728 | 50.70061 | C  | 9.65676  | 7.37369  | 55.62284 |
| H | 9.67623  | 13.40344 | 40.99539 | H  | 10.93208 | 4.04992  | 54.12300 |
| C | 11.04790 | 13.61903 | 42.62982 | C  | 11.29694 | 6.14222  | 54.37619 |
| H | 12.47448 | 10.18974 | 41.57181 | H  | 11.66694 | 13.37860 | 52.18289 |
| C | 12.64095 | 11.83705 | 42.91889 | C  | 12.82466 | 11.65569 | 51.58398 |
| C | 4.89843  | 0.50692  | 52.64289 | H  | 14.09839 | 10.17367 | 50.66397 |
| H | 3.32230  | -0.13963 | 51.34016 | H  | 9.29213  | 8.30235  | 56.05515 |
| H | 7.33662  | -0.76142 | 49.92975 | C  | 10.82402 | 7.38372  | 54.83988 |
| C | 7.14348  | 0.11464  | 51.86650 | H  | 12.19091 | 6.10648  | 53.76041 |
| H | 10.63165 | 14.57379 | 42.93015 | C  | 12.43141 | 10.76049 | 52.70065 |
| C | 12.08622 | 13.04502 | 43.38467 | C  | 11.43522 | 8.63315  | 54.32188 |
| H | 13.45202 | 11.37012 | 43.46807 | C  | 11.10196 | 10.75092 | 53.15884 |
| H | 4.20748  | 0.87499  | 53.39263 | C  | 13.28470 | 9.75641  | 53.19462 |
| C | 6.28227  | 0.66756  | 52.83426 | C  | 10.61634 | 9.71388  | 53.94922 |
| H | 8.21796  | 0.20792  | 51.98600 | C  | 12.79886 | 8.71889  | 53.98519 |
| C | 12.45992 | 13.51859 | 44.74140 | H  | 10.41041 | 11.50817 | 52.80013 |
| C | 6.85950  | 1.57151  | 53.86104 | H  | 14.33646 | 9.76617  | 52.92145 |
| C | 11.48063 | 13.90971 | 45.67809 | H  | 9.55707  | 9.68581  | 54.18905 |
| C | 13.75554 | 13.38406 | 45.27094 | H  | 13.48090 | 7.93918  | 54.31352 |
| C | 8.12058  | 1.36098  | 54.44651 | C  | 7.17096  | -0.77731 | 36.70007 |
| C | 6.28846  | 2.83187  | 54.13415 | C  | 8.27319  | 0.09252  | 36.45900 |
| O | 10.26679 | 14.15204 | 45.36047 | C  | 9.56907  | -1.02067 | 38.21797 |
| C | 11.74549 | 13.90672 | 47.16725 | C  | 8.47201  | -1.87103 | 38.50404 |
| O | 14.79497 | 13.21169 | 44.54681 | H  | 8.51524  | -2.55779 | 39.34051 |
| C | 14.02100 | 13.38162 | 46.76265 | H  | 10.29747 | 0.66054  | 37.03701 |
| O | 8.70768  | 0.22551  | 54.45863 | Ru | 7.77371  | 0.26724  | 38.61933 |
| C | 8.91705  | 2.48758  | 55.07274 | Cl | 8.92130  | 1.19468  | 40.54179 |
| O | 5.11724  | 3.16714  | 53.74836 | H  | -0.37376 | 4.65021  | 43.04611 |
| C | 7.08373  | 3.95657  | 54.75889 | C  | 0.42017  | 5.36936  | 42.88701 |
| O | 10.71588 | 14.14724 | 47.88487 | C  | 0.31689  | 6.33325  | 41.84697 |
| C | 12.98750 | 13.51277 | 47.70705 | H  | -0.55008 | 6.32085  | 41.19657 |
| O | 15.24628 | 13.20802 | 47.08322 | C  | 1.39394  | 7.20676  | 41.55323 |
| O | 10.06234 | 2.14125  | 55.52315 | H  | 1.33752  | 7.87926  | 40.70608 |
| C | 8.44268  | 3.81080  | 55.10702 | C  | 2.60066  | 7.09806  | 42.30930 |
| O | 6.46596  | 5.07421  | 54.80608 | C  | 2.71220  | 6.17604  | 43.38339 |
| C | 13.10502 | 13.03383 | 49.10751 | H  | 3.64635  | 6.07047  | 43.92261 |
| C | 9.33677  | 4.98850  | 55.24175 | C  | 1.63382  | 5.27872  | 43.62626 |
| C | 12.39004 | 13.60275 | 50.17639 | H  | 1.76248  | 4.47394  | 44.34266 |
| C | 13.78784 | 11.82569 | 49.34862 | H  | 3.46572  | 7.68486  | 42.01815 |

|    |          |          |          |    |          |          |          |
|----|----------|----------|----------|----|----------|----------|----------|
| Ru | 2.15127  | 5.08618  | 41.47429 | C  | 7.54681  | 13.04287 | 47.06156 |
| Cl | 1.06090  | 4.13064  | 39.54307 | H  | 7.79340  | 11.99320 | 46.95230 |
| Ru | 4.44789  | 5.05210  | 54.31126 | Cl | 10.09953 | 16.91695 | 46.69848 |
| Ru | 10.71245 | 0.23080  | 55.01900 | Cl | 15.47838 | 10.47076 | 45.72959 |
| Ru | 9.00330  | 14.77366 | 46.88800 | H  | 17.47164 | 13.96880 | 43.06417 |
| Ru | 16.53053 | 12.64633 | 45.54473 | H  | 18.06715 | 11.54299 | 43.21153 |
| H  | 8.16388  | 0.90821  | 35.75186 | C  | 3.64713  | 7.14485  | 54.54397 |
| C  | 9.48581  | -0.03980 | 37.19052 | C  | 2.35601  | 5.30689  | 53.51498 |
| H  | 6.23743  | -0.64040 | 36.16692 | H  | 3.20427  | 4.49781  | 51.68294 |
| H  | 10.43973 | -1.04023 | 38.86321 | H  | 5.08155  | 6.14972  | 51.55593 |
| C  | 7.26490  | -1.72140 | 37.75605 | C  | 4.56102  | 7.09802  | 53.45046 |
| H  | 6.38819  | -2.29367 | 38.04101 | H  | 3.83853  | 7.79241  | 55.39070 |
| H  | 18.73950 | 11.98422 | 47.47663 | H  | 1.93301  | 6.17896  | 55.45335 |
| C  | 18.55540 | 12.43124 | 46.50731 | H  | 5.45852  | 7.70717  | 53.48020 |
| C  | 18.22001 | 13.81662 | 46.40452 | C  | 2.55433  | 6.23864  | 54.56722 |
| H  | 18.14081 | 14.41312 | 47.30739 | C  | 4.35805  | 6.20721  | 52.36076 |
| C  | 17.90892 | 14.40151 | 45.15026 | C  | 3.28352  | 5.27910  | 52.43178 |
| H  | 17.61226 | 15.44199 | 45.08771 | H  | 1.57073  | 4.56416  | 53.58296 |
| C  | 17.84247 | 13.56240 | 43.99940 | H  | 12.22714 | 0.91527  | 57.47408 |
| C  | 18.17433 | 12.18298 | 44.07856 | C  | 12.01944 | 0.08027  | 56.81311 |
| C  | 18.52091 | 11.62629 | 45.34289 | H  | 13.66529 | 0.53906  | 55.46268 |
| H  | 18.64834 | 10.55374 | 45.43290 | H  | 10.23670 | -0.54639 | 57.90993 |
| H  | 8.06644  | 13.12841 | 49.16637 | C  | 12.83637 | -0.12603 | 55.67085 |
| C  | 7.68913  | 13.68930 | 48.31757 | C  | 10.87855 | -0.74131 | 57.05870 |
| C  | 7.42251  | 15.08499 | 48.46294 | C  | 12.47208 | -1.13432 | 54.73076 |
| H  | 7.58142  | 15.57627 | 49.41505 | C  | 10.51552 | -1.71284 | 56.09285 |
| C  | 7.07057  | 15.84118 | 47.31705 | C  | 11.32382 | -1.93513 | 54.93379 |
| H  | 6.99392  | 16.91957 | 47.39462 | H  | 13.01655 | -1.20963 | 53.79666 |
| C  | 6.96683  | 15.22649 | 46.03898 | H  | 9.57932  | -2.25068 | 56.19978 |
| H  | 6.78301  | 15.82757 | 45.15709 | H  | 11.00815 | -2.64170 | 54.17578 |
| C  | 7.23856  | 13.83410 | 45.91853 | Cl | 4.09304  | 4.09051  | 56.49777 |
| H  | 7.27276  | 13.38112 | 44.93308 | Cl | 11.11761 | 1.16312  | 52.81882 |

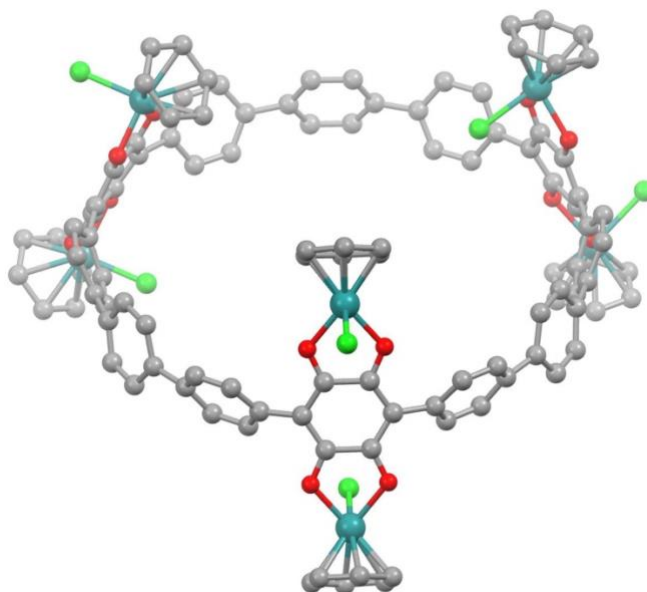

**Figure S41.** Optimized structure of **Ru<sub>6</sub>(12O-CPP)** with Cl atoms in the lower symmetry configuration. Protons omitted for clarity. Ru, Cl, O, and C atoms are represented as dark green, light green, red, and gray, respectively.

|            |            |          |          |   |          |          |          |
|------------|------------|----------|----------|---|----------|----------|----------|
| 204        |            |          |          | H | 6.49915  | 0.16428  | 42.30389 |
| E(RB3LYP): | -8386.3109 | Hartree  |          | C | 5.49113  | -0.53660 | 44.05691 |
| H          | 4.61048    | 6.23169  | 38.36768 | H | 9.48163  | 6.14374  | 39.21927 |
| H          | 5.90381    | 8.31341  | 38.22906 | C | 7.79155  | 7.40809  | 38.76169 |
| O          | 6.87534    | 2.15394  | 38.32622 | H | 2.15939  | -0.28790 | 44.64271 |
| C          | 5.98510    | 2.48295  | 39.18352 | C | 4.29101  | -0.60956 | 44.78799 |
| C          | 5.49012    | 1.34027  | 40.04650 | H | 6.42175  | -0.84617 | 44.52363 |
| C          | 5.52813    | 3.80142  | 39.35291 | C | 8.53137  | 8.66253  | 39.04791 |
| O          | 6.03577    | 0.21091  | 39.79689 | C | 4.33869  | -0.91240 | 46.24029 |
| C          | 4.54072    | 1.52876  | 41.06546 | C | 7.89203  | 9.71002  | 39.73463 |
| C          | 4.41127    | 3.93418  | 40.20465 | C | 9.91972  | 8.77965  | 38.85112 |
| C          | 6.29401    | 4.99134  | 38.90315 | C | 3.53376  | -0.18384 | 47.13410 |
| C          | 4.38291    | 0.59784  | 42.21148 | C | 5.31091  | -1.76029 | 46.80259 |
| C          | 3.91575    | 2.79330  | 41.06460 | H | 6.82163  | 9.65468  | 39.91125 |
| O          | 3.82794    | 5.04917  | 40.42309 | C | 8.61855  | 10.74314 | 40.31799 |
| C          | 7.69423    | 4.98770  | 39.05357 | H | 10.44259 | 8.02704  | 38.26690 |
| C          | 5.67993    | 6.20376  | 38.54247 | C | 10.64703 | 9.81353  | 39.43424 |
| C          | 3.16007    | 0.40703  | 42.87828 | H | 2.77281  | 0.48444  | 46.74102 |
| C          | 5.53960    | 0.04905  | 42.79777 | C | 3.78179  | -0.19154 | 48.50279 |
| O          | 2.98837    | 3.11474  | 41.88201 | H | 5.90915  | -2.39340 | 46.15279 |
| H          | 8.20442    | 4.06708  | 39.31785 | C | 5.55923  | -1.76792 | 48.17245 |
| C          | 8.42111    | 6.16986  | 38.98597 | H | 8.09911  | 11.46817 | 40.93804 |
| C          | 6.41630    | 7.38597  | 38.47268 | C | 10.02201 | 10.78095 | 40.24265 |
| H          | 2.24273    | 0.77220  | 42.43039 | H | 11.72416 | 9.84901  | 39.29322 |
| C          | 3.11767    | -0.18738 | 44.13904 | H | 3.20856  | 0.47092  | 49.14522 |



|   |          |          |          |    |          |          |          |
|---|----------|----------|----------|----|----------|----------|----------|
| C | 4.84777  | -0.92815 | 49.04931 | C  | 8.80850  | 6.12985  | 55.83129 |
| H | 6.34636  | -2.40667 | 48.56410 | C  | 10.51425 | 4.92343  | 54.63442 |
| C | 10.78678 | 11.66245 | 41.15867 | H  | 11.70906 | 14.48107 | 50.02508 |
| C | 5.31357  | -0.64065 | 50.42899 | C  | 12.07476 | 12.87412 | 51.39321 |
| C | 10.31800 | 12.91718 | 41.58178 | H  | 14.27618 | 11.33114 | 48.63121 |
| C | 11.93396 | 11.16132 | 41.79949 | C  | 13.51804 | 11.12669 | 50.61542 |
| C | 4.44342  | -0.22925 | 51.45350 | H  | 7.86978  | 6.15313  | 56.37284 |
| C | 6.69414  | -0.57068 | 50.69210 | C  | 9.52031  | 7.31427  | 55.64364 |
| H | 9.47066  | 13.37159 | 41.07439 | H  | 10.89957 | 4.00610  | 54.20124 |
| C | 10.88285 | 13.57558 | 42.67332 | C  | 11.21667 | 6.10769  | 54.44853 |
| H | 12.32658 | 10.19127 | 41.50819 | H  | 11.45564 | 13.32199 | 52.16652 |
| C | 12.50084 | 11.81396 | 42.88546 | C  | 12.66455 | 11.61938 | 51.61871 |
| C | 4.92652  | 0.35311  | 52.62489 | H  | 13.98948 | 10.15671 | 50.74536 |
| H | 3.36922  | -0.32836 | 51.31796 | H  | 9.12553  | 8.23874  | 56.05797 |
| H | 7.40111  | -0.87233 | 49.92470 | C  | 10.70514 | 7.34250  | 54.88825 |
| C | 7.18238  | 0.00321  | 51.85957 | H  | 12.12674 | 6.08657  | 53.85594 |
| H | 10.45810 | 14.51570 | 43.00070 | C  | 12.26952 | 10.73021 | 52.73868 |
| C | 11.94668 | 13.00462 | 43.39683 | C  | 11.29537 | 8.60077  | 54.36756 |
| H | 13.33527 | 11.35058 | 43.39788 | C  | 10.92834 | 10.68708 | 53.15839 |
| H | 4.22530  | 0.71056  | 53.37048 | C  | 13.13983 | 9.76165  | 53.27212 |
| C | 6.30575  | 0.54248  | 52.82067 | C  | 10.45393 | 9.64862  | 53.95340 |
| H | 8.25431  | 0.11757  | 51.98535 | C  | 12.66457 | 8.72226  | 54.06689 |
| C | 12.35110 | 13.46132 | 44.74911 | H  | 10.22330 | 11.41276 | 52.76307 |
| C | 6.85669  | 1.46494  | 53.84553 | H  | 14.19823 | 9.80090  | 53.02800 |
| C | 11.42681 | 13.97910 | 45.67966 | H  | 9.38949  | 9.58972  | 54.16209 |
| C | 13.64020 | 13.25311 | 45.28200 | H  | 13.36023 | 7.96901  | 54.42718 |
| C | 8.10612  | 1.27391  | 54.46019 | C  | 7.00729  | -0.76779 | 36.59781 |
| C | 6.26962  | 2.72591  | 54.07997 | C  | 8.10508  | 0.10257  | 36.33684 |
| O | 10.28308 | 14.44515 | 45.35368 | C  | 9.45055  | -1.04457 | 38.03573 |
| C | 11.69317 | 13.97173 | 47.17307 | C  | 8.36020  | -1.89617 | 38.34125 |
| O | 14.65299 | 12.93891 | 44.56726 | H  | 8.42675  | -2.59705 | 39.16438 |
| C | 13.90649 | 13.24666 | 46.77294 | H  | 10.14817 | 0.65414  | 36.86062 |
| O | 8.70643  | 0.14522  | 54.49233 | Ru | 7.67331  | 0.24218  | 38.51393 |
| C | 8.87336  | 2.41347  | 55.09907 | Cl | 8.88952  | 1.14849  | 40.40488 |
| O | 5.11056  | 3.04762  | 53.65036 | H  | -0.28497 | 4.58213  | 43.35357 |
| C | 7.03655  | 3.86387  | 54.71522 | C  | 0.51456  | 5.29103  | 43.17740 |
| O | 10.73298 | 14.43161 | 47.87876 | C  | 0.38238  | 6.28534  | 42.16903 |
| C | 12.88196 | 13.44758 | 47.72121 | H  | -0.51350 | 6.30651  | 41.55933 |
| O | 15.10380 | 12.92841 | 47.09003 | C  | 1.46136  | 7.14667  | 41.84976 |
| O | 10.01074 | 2.08301  | 55.58170 | H  | 1.37929  | 7.84390  | 41.02498 |
| C | 8.38371  | 3.73108  | 55.11269 | C  | 2.69890  | 6.99697  | 42.54744 |
| O | 6.41131  | 4.97755  | 54.72638 | C  | 2.84159  | 6.04318  | 43.58862 |
| C | 12.97144 | 12.97949 | 49.12608 | H  | 3.79676  | 5.90784  | 44.08246 |
| C | 9.25733  | 4.92138  | 55.26964 | C  | 1.75824  | 5.15862  | 43.85702 |
| C | 12.22352 | 13.54120 | 50.17795 | H  | 1.90422  | 4.33255  | 44.54530 |
| C | 13.67078 | 11.78800 | 49.40469 | H  | 3.56046  | 7.57782  | 42.23488 |

|    |          |          |          |    |          |          |          |
|----|----------|----------|----------|----|----------|----------|----------|
| Ru | 2.17169  | 5.01521  | 41.67847 | C  | 6.79333  | 15.18328 | 47.43574 |
| Cl | 0.96730  | 4.11412  | 39.78852 | H  | 6.11480  | 14.37059 | 47.66716 |
| Ru | 4.41580  | 4.94287  | 54.14651 | Cl | 8.54679  | 12.47921 | 46.95556 |
| Ru | 10.69313 | 0.17594  | 55.11060 | Cl | 16.27881 | 15.33779 | 45.58784 |
| Ru | 8.94783  | 14.85838 | 46.89554 | H  | 18.10250 | 13.04559 | 43.00316 |
| Ru | 16.49346 | 12.93297 | 45.54054 | H  | 16.76561 | 10.95408 | 43.34136 |
| H  | 7.97663  | 0.93053  | 35.64741 | C  | 3.62519  | 7.04750  | 54.29106 |
| C  | 9.33915  | -0.04620 | 37.02737 | C  | 2.35257  | 5.18809  | 53.27800 |
| H  | 6.05803  | -0.61854 | 36.09671 | H  | 3.24985  | 4.31950  | 51.49792 |
| H  | 10.34076 | -1.07769 | 38.65311 | H  | 5.14099  | 5.95713  | 51.37788 |
| C  | 7.13060  | -1.73000 | 37.63381 | C  | 4.57116  | 6.96316  | 53.22668 |
| H  | 6.26108  | -2.30411 | 37.93650 | H  | 3.79533  | 7.71969  | 55.12302 |
| H  | 17.60549 | 11.08009 | 47.57424 | H  | 1.87732  | 6.12117  | 55.17602 |
| C  | 17.79387 | 11.44923 | 46.57143 | H  | 5.47082  | 7.56867  | 53.26388 |
| C  | 18.55463 | 12.64061 | 46.39839 | C  | 2.52584  | 6.15023  | 54.30804 |
| H  | 18.94702 | 13.16963 | 47.25804 | C  | 4.39506  | 6.04127  | 52.15956 |
| C  | 18.68123 | 13.19448 | 45.09581 | C  | 3.31183  | 5.12216  | 52.22548 |
| H  | 19.14717 | 14.16559 | 44.97530 | H  | 1.56010  | 4.45289  | 53.34420 |
| C  | 18.07356 | 12.57129 | 43.97642 | H  | 12.16540 | 0.90484  | 57.57870 |
| C  | 17.31706 | 11.37750 | 44.17440 | C  | 11.96892 | 0.05801  | 56.92947 |
| C  | 17.21583 | 10.77783 | 45.45786 | H  | 13.63738 | 0.49164  | 55.59984 |
| H  | 16.61025 | 9.89109  | 45.60449 | H  | 10.16569 | -0.54732 | 58.00543 |
| H  | 7.50276  | 15.37481 | 49.48190 | C  | 12.80498 | -0.16964 | 55.80623 |
| C  | 7.59255  | 15.73663 | 48.46491 | C  | 10.82247 | -0.75864 | 57.16962 |
| C  | 8.60315  | 16.68858 | 48.12442 | C  | 12.45632 | -1.19521 | 54.87781 |
| H  | 9.28500  | 17.03871 | 48.89240 | C  | 10.47615 | -1.74804 | 56.21669 |
| C  | 8.77644  | 17.12317 | 46.78604 | C  | 11.30468 | -1.99138 | 55.07554 |
| H  | 9.57207  | 17.81335 | 46.53061 | H  | 13.01712 | -1.28777 | 53.95502 |
| C  | 7.98993  | 16.51807 | 45.76289 | H  | 9.53816  | -2.28394 | 56.31727 |
| H  | 8.20710  | 16.73964 | 44.72315 | H  | 11.00148 | -2.71147 | 54.32516 |
| C  | 6.97673  | 15.57247 | 46.07836 | Cl | 3.96943  | 4.02449  | 56.33548 |
| H  | 6.42151  | 15.08010 | 45.28970 | Cl | 11.15624 | 1.09572  | 52.91574 |

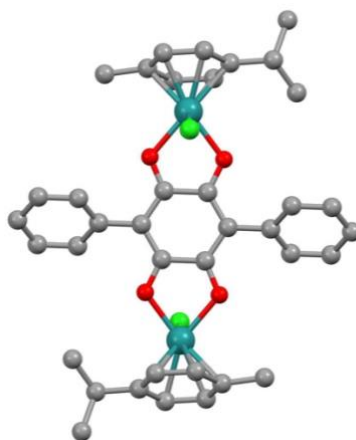

**Figure S42.** Optimized structure of **Ru<sub>2</sub>(Ph<sub>2</sub>dhbq)**. Protons omitted for clarity. Ru, Cl, O, and C atoms are represented as dark green, light green, red, and gray, respectively.

|            |              |          |          |   |          |          |          |
|------------|--------------|----------|----------|---|----------|----------|----------|
| 84         |              |          |          | C | -5.17752 | -2.05924 | 0.98692  |
| E(RB3LYP): | -2880.135513 | Hartree  |          | C | -1.17139 | 5.06112  | 0.66778  |
| C          | 7.20434      | -2.42039 | -2.51177 | C | -5.63439 | 0.76341  | 1.48929  |
| C          | 4.86701      | 0.04775  | -2.39864 | C | -5.88831 | 2.24359  | 1.72421  |
| C          | 4.65942      | 1.42555  | -2.16933 | C | 0.80433  | 3.40373  | 1.72945  |
| C          | -0.74346     | -4.74707 | -2.10114 | C | -0.24340 | 5.58188  | 1.57239  |
| C          | 4.72612      | -2.97606 | -2.41279 | C | -4.72611 | 2.97606  | 2.41278  |
| C          | 0.24340      | -5.58188 | -1.57238 | C | 0.74346  | 4.74706  | 2.10115  |
| C          | -0.80433     | -3.40373 | -1.72944 | C | -4.65943 | -1.42555 | 2.16933  |
| C          | 5.88832      | -2.24358 | -1.72422 | C | -4.86702 | -0.04775 | 2.39863  |
| C          | 5.63439      | -0.76341 | -1.48930 | C | -7.20434 | 2.42040  | 2.51175  |
| C          | 1.17139      | -5.06113 | -0.66777 | H | 7.12817  | -1.97113 | -3.50964 |
| C          | 5.17751      | 2.05924  | -0.98692 | H | 4.37045  | -0.42061 | -3.24079 |
| C          | 0.12529      | -2.86973 | -0.82099 | H | 4.01761  | 1.98943  | -2.83842 |
| C          | 4.83879      | 3.49514  | -0.68997 | H | 4.60714  | -2.65904 | -3.45645 |
| C          | 1.11483      | -3.71802 | -0.29480 | H | -1.46775 | -5.14045 | -2.81031 |
| C          | 1.20591      | -0.62335 | -0.38749 | H | 7.42744  | -3.48550 | -2.64014 |
| C          | 0.06255      | -1.44174 | -0.41776 | H | 0.28888  | -6.62861 | -1.86253 |
| C          | 6.15496      | -0.12020 | -0.34238 | H | 8.05145  | -1.95497 | -1.99547 |
| C          | 5.93996      | 1.27231  | -0.09067 | H | 4.93075  | -4.05207 | -2.42809 |
| C          | 1.14382      | 0.82443  | 0.04389  | H | -1.57217 | -2.75974 | -2.14598 |
| C          | -1.14382     | -0.82443 | -0.04389 | H | 3.77856  | -2.81254 | -1.89201 |
| C          | -5.93996     | -1.27231 | 0.09066  | H | 5.32838  | 4.15885  | -1.41341 |
| C          | -6.15496     | 0.12020  | 0.34237  | H | 3.75753  | 3.65465  | -0.75325 |
| C          | -0.06255     | 1.44173  | 0.41776  | H | 1.94059  | -5.70297 | -0.24523 |
| C          | -1.20591     | 0.62334  | 0.38750  | H | -6.27317 | -1.69905 | -0.84817 |
| C          | -1.11483     | 3.71802  | 0.29481  | H | 6.02576  | -2.69364 | -0.73264 |
| C          | -4.83880     | -3.49514 | 0.68996  | H | -6.64221 | 0.71619  | -0.42176 |
| C          | -0.12529     | 2.86973  | 0.82099  | H | 1.83644  | -3.31999 | 0.41172  |

|   |          |          |          |    |          |          |          |
|---|----------|----------|----------|----|----------|----------|----------|
| H | -5.16568 | -3.77789 | -0.31394 | H  | -7.42744 | 3.48552  | 2.64013  |
| H | 5.16568  | 3.77789  | 0.31393  | H  | 1.46775  | 5.14045  | 2.81031  |
| H | -1.83644 | 3.31998  | -0.41171 | H  | -4.60714 | 2.65904  | 3.45644  |
| H | 6.64222  | -0.71619 | 0.42175  | H  | -4.01762 | -1.98943 | 2.83842  |
| H | -6.02575 | 2.69364  | 0.73262  | H  | -4.37046 | 0.42061  | 3.24079  |
| H | 6.27317  | 1.69906  | 0.84816  | H  | -7.12817 | 1.97114  | 3.50963  |
| H | -1.94060 | 5.70297  | 0.24524  | O  | 2.36112  | -1.01631 | -0.76817 |
| H | -3.75754 | -3.65466 | 0.75325  | O  | 2.26031  | 1.44484  | -0.01526 |
| H | -5.32840 | -4.15885 | 1.41340  | O  | -2.26031 | -1.44484 | 0.01527  |
| H | -3.77856 | 2.81254  | 1.89200  | O  | -2.36112 | 1.01631  | 0.76817  |
| H | 1.57218  | 2.75974  | 2.14598  | Cl | -3.72864 | 0.46658  | -1.92586 |
| H | -4.93074 | 4.05207  | 2.42808  | Cl | 3.72865  | -0.46658 | 1.92586  |
| H | -8.05145 | 1.95498  | 1.99546  | Ru | 3.95335  | 0.27990  | -0.37339 |
| H | -0.28888 | 6.62861  | 1.86254  | Ru | -3.95335 | -0.27990 | 0.37339  |

## 7. Supplementary Crystallographic Data:

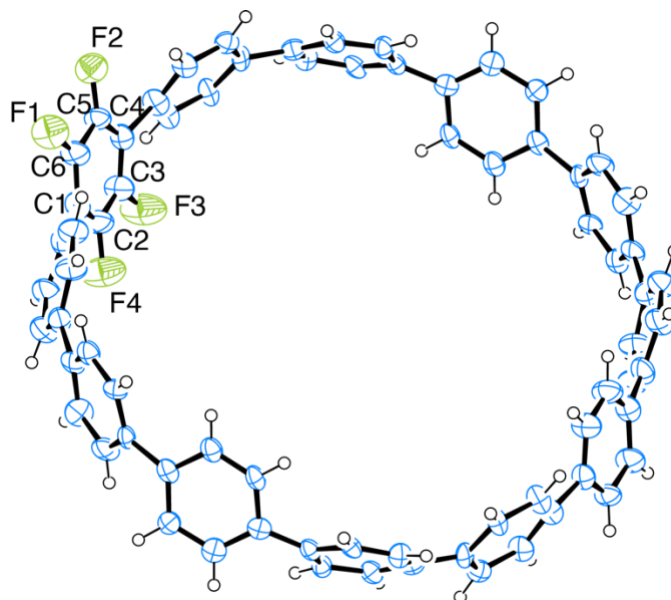

**Figure S43.** ORTEP of the single crystal structure of **4F-CPP**. Disorder and solvent are omitted for clarity. Thermal ellipsoids are rendered at the 50% probability level.

**Table S2.** Crystallographic parameters for the single crystal structure of **4F-CPP**.

|                                 |                                       |                 |
|---------------------------------|---------------------------------------|-----------------|
| Empirical formula               | C72 H44 F4                            |                 |
| Formula weight                  | 985.07                                |                 |
| Temperature                     | 100(2) K                              |                 |
| Wavelength                      | 0.7288 Å                              |                 |
| Crystal system                  | Monoclinic                            |                 |
| Space group                     | P 2 <sub>1</sub> /c                   |                 |
| Unit cell dimensions            | a = 19.7037(19) Å                     | α = 90°         |
|                                 | b = 8.3789(8) Å                       | β = 108.289(3)° |
|                                 | c = 21.004(2) Å                       | γ = 90°         |
| Volume                          | 3292.4(6) Å <sup>3</sup>              |                 |
| Z                               | 2                                     |                 |
| Density (calculated)            | 0.994 Mg/m <sup>3</sup>               |                 |
| Absorption coefficient          | 0.068 mm <sup>-1</sup>                |                 |
| F(000)                          | 1024                                  |                 |
| Crystal size                    | 0.300 x 0.090 x 0.040 mm <sup>3</sup> |                 |
| Theta range for data collection | 2.041 to 27.106°                      |                 |
| Index ranges                    | -24 ≤ h ≤ 22, 0 ≤ k ≤ 10, 0 ≤ l ≤ 26  |                 |

|                                      |                                               |
|--------------------------------------|-----------------------------------------------|
| Reflections collected                | 6324                                          |
| Independent reflections              | 6324 [ $R_{\text{int}} = 0.0408$ ]            |
| Completeness to theta = 25.930°      | 98.8%                                         |
| Refinement method                    | Full-matrix least-squares on $F^2$            |
| Data / restraints / parameters       | 6324 / 180 / 362                              |
| Goodness-of-fit on $F^2$             | 1.033                                         |
| Final R indices [ $I > 2\sigma(I)$ ] | $R_1 = 0.0706$ , $wR_2 = 0.2148$              |
| R indices (all data)                 | $R_1 = 0.0802$ , $wR_2 = 0.2240$              |
| Largest diff. peak and hole          | 0.592 and $-0.362 \text{ e } \text{\AA}^{-3}$ |

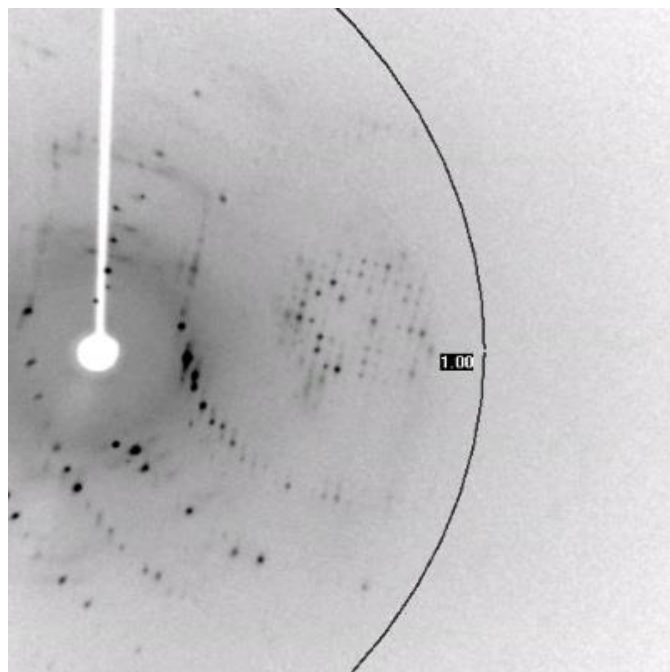

**Figure S44.** Example of the diffraction pattern observed while collecting the single crystal structure of **4MeO-CPP**.

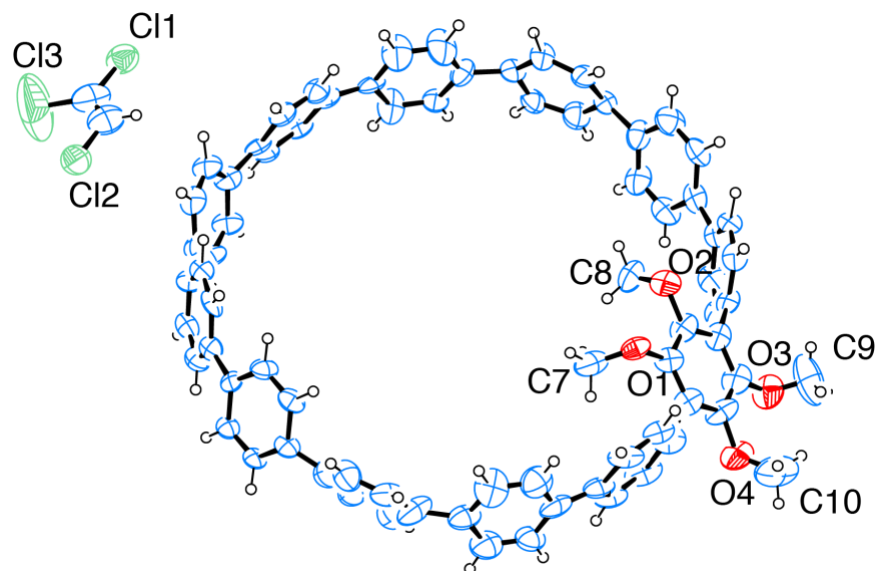

**Figure S45.** ORTEP of the single crystal structure of **4MeO-CPP** with one refined trichloroethylene solvent molecule. Thermal ellipsoids are rendered at the 50% probability level.

**Table S3.** Crystallographic parameters for the single crystal structure of **4MeO-CPP**.

|                                   |                                                                                               |
|-----------------------------------|-----------------------------------------------------------------------------------------------|
| Empirical formula                 | C <sub>78</sub> H <sub>57</sub> Cl <sub>3</sub> O <sub>4</sub> [+ solvent]                    |
| Formula weight                    | 1164.58                                                                                       |
| Temperature                       | 100(2) K                                                                                      |
| Wavelength                        | 0.71073 Å                                                                                     |
| Crystal system                    | Orthorhombic                                                                                  |
| Space group                       | F d d 2                                                                                       |
| Unit cell dimensions              | a = 57.683(4) Å      α = 90°<br>b = 12.1111(8) Å      β = 90°<br>c = 50.915(3) Å      γ = 90° |
| Volume                            | 35569(4) Å <sup>3</sup>                                                                       |
| Z                                 | 16                                                                                            |
| Density (calculated)              | 0.870 Mg/m <sup>3</sup>                                                                       |
| Absorption coefficient            | 0.139 mm <sup>-1</sup>                                                                        |
| F(000)                            | 9728                                                                                          |
| Crystal size                      | 0.600 x 0.150 x 0.090 mm <sup>3</sup>                                                         |
| Theta range for data collection   | 2.027 to 25.027°                                                                              |
| Index ranges                      | -68 ≤ h ≤ 68, -14 ≤ k ≤ 14, -60 ≤ l ≤ 60                                                      |
| Reflections collected             | 101139                                                                                        |
| Independent reflections           | 15535 [R <sub>int</sub> = 0.1097]                                                             |
| Completeness to theta = 25.027°   | 99.2 %                                                                                        |
| Refinement method                 | Full-matrix least-squares on F <sup>2</sup>                                                   |
| Data / restraints / parameters    | 15535 / 1003 / 786                                                                            |
| Goodness-of-fit on F <sup>2</sup> | 1.050                                                                                         |
| Final R indices [I > 2σ(I)]       | R1 = 0.1202, wR2 = 0.3064                                                                     |
| R indices (all data)              | R1 = 0.1800, wR2 = 0.3545                                                                     |
| Absolute structure parameter      | 0.6(2)                                                                                        |
| Largest diff. peak and hole       | 0.430 and -0.472 e Å <sup>-3</sup>                                                            |



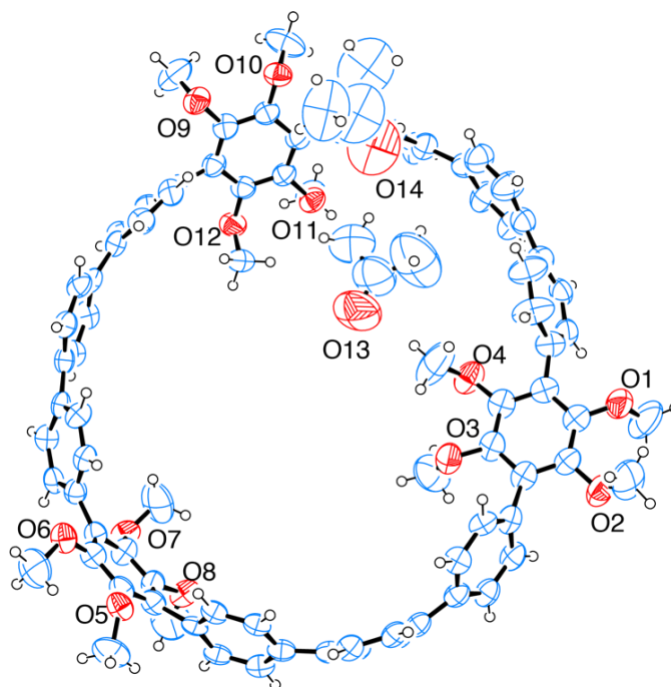

**Figure S46.** ORTEP of the single crystal structure of **12MeO-CPP** with two refined acetone solvent molecules. Disorder of one acetone (O14...) is omitted for clarity. Thermal ellipsoids are rendered at the 50% probability level.

**Table S4.** Crystallographic parameters for the single crystal structure of **12MeO-CPP**.

|                                 |                                                 |                 |
|---------------------------------|-------------------------------------------------|-----------------|
| Empirical formula               | C <sub>90</sub> H <sub>84</sub> O <sub>14</sub> |                 |
| Formula weight                  | 1389.57                                         |                 |
| Temperature                     | 100(2) K                                        |                 |
| Wavelength                      | 0.7288 Å                                        |                 |
| Crystal system                  | Monoclinic                                      |                 |
| Space group                     | P 2 <sub>1</sub> /n                             |                 |
| Unit cell dimensions            | a = 20.514(3) Å                                 | α = 90°         |
|                                 | b = 9.4966(13) Å                                | β = 104.097(5)° |
|                                 | c = 39.416(6) Å                                 | γ = 90°         |
| Volume                          | 7447.4(18) Å <sup>3</sup>                       |                 |
| Z                               | 4                                               |                 |
| Density (calculated)            | 1.239 Mg/m <sup>3</sup>                         |                 |
| Absorption coefficient          | 0.086 mm <sup>-1</sup>                          |                 |
| F(000)                          | 2944                                            |                 |
| Crystal size                    | 0.200 x 0.100 x 0.100 mm <sup>3</sup>           |                 |
| Theta range for data collection | 2.456 to 25.709°                                |                 |

|                                         |                                                            |
|-----------------------------------------|------------------------------------------------------------|
| Index ranges                            | $-24 \leq h \leq 23, -11 \leq k \leq 11, 0 \leq l \leq 46$ |
| Reflections collected                   | 25207                                                      |
| Independent reflections                 | 13026 [ $R_{\text{int}} = 0.0251$ ]                        |
| Completeness to $\theta = 25.709^\circ$ | 99.0 %                                                     |
| Refinement method                       | Full-matrix least-squares on $F^2$                         |
| Data / restraints / parameters          | 13026 / 639 / 969                                          |
| Goodness-of-fit on $F^2$                | 1.062                                                      |
| Final R indices [ $I > 2\sigma(I)$ ]    | $R1 = 0.1274, wR2 = 0.2752$                                |
| R indices (all data)                    | $R1 = 0.1445, wR2 = 0.2820$                                |
| Extinction coefficient                  | 0.0276(17)                                                 |
| Largest diff. peak and hole             | 0.488 and $-0.362 \text{ e } \text{\AA}^{-3}$              |

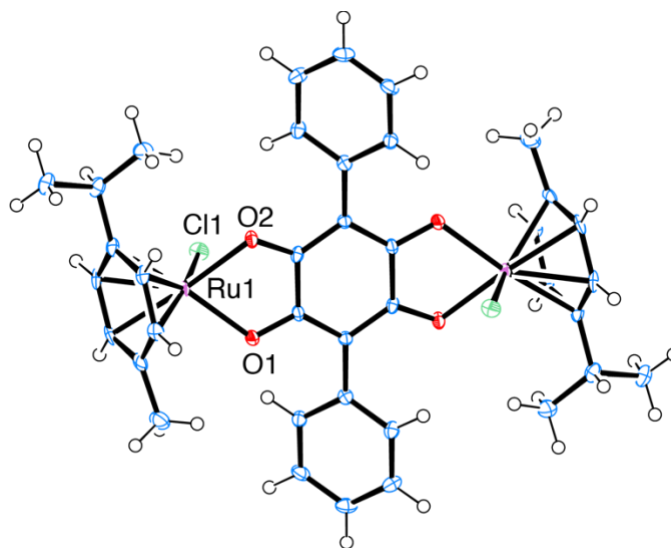

**Figure S47.** ORTEP of the single crystal structure of **Ru<sub>2</sub>(Ph<sub>2</sub>dhbq)**. Thermal ellipsoids are rendered at the 50% probability level.

**Table S5.** Crystallographic parameters for the single crystal structure of **Ru<sub>2</sub>(Ph<sub>2</sub>dhbq)**.

|                                 |                                                                                |                 |
|---------------------------------|--------------------------------------------------------------------------------|-----------------|
| Empirical formula               | C <sub>38</sub> H <sub>38</sub> Cl <sub>2</sub> O <sub>4</sub> Ru <sub>2</sub> |                 |
| Formula weight                  | 831.72                                                                         |                 |
| Temperature                     | 100(2) K                                                                       |                 |
| Wavelength                      | 0.71073 Å                                                                      |                 |
| Crystal system                  | Monoclinic                                                                     |                 |
| Space group                     | P 2 <sub>1</sub> /n                                                            |                 |
| Unit cell dimensions            | a = 11.6451(7) Å                                                               | α = 90°         |
|                                 | b = 10.9012(6) Å                                                               | β = 109.990(3)° |
|                                 | c = 14.0135(7) Å                                                               | γ = 90°         |
| Volume                          | 1671.77(16) Å <sup>3</sup>                                                     |                 |
| Z                               | 2                                                                              |                 |
| Density (calculated)            | 1.652 Mg/m <sup>3</sup>                                                        |                 |
| Absorption coefficient          | 1.104 mm <sup>-1</sup>                                                         |                 |
| F(000)                          | 840                                                                            |                 |
| Crystal size                    | 0.090 x 0.060 x 0.050 mm <sup>3</sup>                                          |                 |
| Theta range for data collection | 1.972 to 28.357°                                                               |                 |
| Index ranges                    | -15 ≤ h ≤ 15, -14 ≤ k ≤ 14, -18 ≤ l ≤ 18                                       |                 |
| Reflections collected           | 16214                                                                          |                 |
| Independent reflections         | 4178 [R <sub>int</sub> = 0.0744]                                               |                 |

|                                   |                                             |
|-----------------------------------|---------------------------------------------|
| Completeness to theta = 25.000°   | 100.0 %                                     |
| Refinement method                 | Full-matrix least-squares on F <sup>2</sup> |
| Data / restraints / parameters    | 4178 / 0 / 211                              |
| Goodness-of-fit on F <sup>2</sup> | 1.015                                       |
| Final R indices [I>2sigma(I)]     | R1 = 0.0307, wR2 = 0.0582                   |
| R indices (all data)              | R1 = 0.0525, wR2 = 0.0653                   |
| Largest diff. peak and hole       | 0.576 and -0.972 e Å <sup>-3</sup>          |

## 8. References:

- (1) Leonhardt, E. J.; Van Raden, J. M.; Miller, D.; Zakharov, L. N.; Alemán, B.; Jasti, R. A Bottom-Up Approach to Solution-Processed, Atomically Precise Graphitic Cylinders on Graphite. *Nano Lett.* **2018**, *18* (12), 7991–7997. <https://doi.org/10.1021/acs.nanolett.8b03979>.
- (2) Van Raden, J. M.; Leonhardt, E. J.; Zakharov, L. N.; Pérez-Guardiola, A.; Pérez-Jiménez, A. J.; Marshall, C. R.; Brozek, C. K.; Sancho-García, J. C.; Jasti, R. Precision Nanotube Mimics via Self-Assembly of Programmed Carbon Nanohoops. *J. Org. Chem.* **2020**, *85* (1), 129–141. <https://doi.org/10.1021/acs.joc.9b02340>.
- (3) C. Lovell, T.; E. Colwell, C.; N. Zakharov, L.; Jasti, R. Symmetry Breaking and the Turn-on Fluorescence of Small, Highly Strained Carbon Nanohoops. *Chemical Science* **2019**, *10* (13), 3786–3790. <https://doi.org/10.1039/C9SC00169G>.
- (4) Kamin, A. A.; Moseley, I. P.; Oh, J.; Brannan, E. J.; Gannon, P. M.; Kaminsky, W.; Zadrozny, J. M.; Xiao, D. J. Geometry-Dependent Valence Tautomerism, Magnetism, and Electrical Conductivity in 1D Iron–Tetraoxolene Chains. *Chem. Sci.* **2023**. <https://doi.org/10.1039/D2SC06392A>.
- (5) Garci, A.; Mbakidi, J.-P.; Chaleix, V.; Sol, V.; Orhan, E.; Therrien, B. Tunable Arene Ruthenium Metallaprisms to Transport, Shield, and Release Porphin in Cancer Cells. *Organometallics* **2015**, *34* (16), 4138–4146. <https://doi.org/10.1021/acs.organomet.5b00555>.
- (6) Morisaki, Y.; Tsuji, Y.; Chujo, Y. Synthesis of Cyclic Compounds Consisting of Face-to-Face p-Oligophenyls. *Tetrahedron Letters* **2014**, *55* (9), 1631–1634. <https://doi.org/10.1016/j.tetlet.2014.01.093>.
- (7) Bruker (2007). APEX2 (Version 2.1-4), SAINT (Version 7.34A), SADABS (Version 2007/4). BrukerAXS Inc., Madison, Wisconsin, USA.
- (8) Sheldrick, G. M. A Short History of SHELX. *Acta Cryst A* **2008**, *64* (1), 112–122. <https://doi.org/10.1107/S0108767307043930>.
- (9) Sheldrick, G. M. SHELXT – Integrated Space-Group and Crystal-Structure Determination. *Acta Cryst A* **2015**, *71* (1), 3–8. <https://doi.org/10.1107/S2053273314026370>.
- (10) SHELDRICK, G. M. SHELXL-97, Program for the Solution of Crystal Structures. *University of Göttingen, Germany*. **1997**.
- (11) Sheldrick, G. M. Crystal Structure Refinement with SHELXL. *Acta Cryst C* **2015**, *71* (1), 3–8. <https://doi.org/10.1107/S2053229614024218>.
- (12) Waasmaier, D.; Kirfel, A. New Analytical Scattering-Factor Functions for Free Atoms and Ions. *Acta Cryst A* **1995**, *51* (3), 416–431. <https://doi.org/10.1107/S0108767394013292>.
- (13) Spek, A. L. Single-Crystal Structure Validation with the Program PLATON. *J Appl Cryst* **2003**, *36* (1), 7–13. <https://doi.org/10.1107/S0021889802022112>.
- (14) Spek, A. L. Structure Validation in Chemical Crystallography. *Acta Cryst D* **2009**, *65* (2), 148–155. <https://doi.org/10.1107/S0907444490804362X>.
- (15) van der Sluis, P.; Spek, A. L. BYPASS: An Effective Method for the Refinement of Crystal Structures Containing Disordered Solvent Regions. *Acta Cryst A* **1990**, *46* (3), 194–201. <https://doi.org/10.1107/S0108767389011189>.
- (16) Gaussian 16, Revision B.01. M.J. Frisch et al. Gaussian, Inc. Wallingford CT, 2016.
- (17) Becke, A. D. Density-functional Thermochemistry. III. The Role of Exact Exchange. *J. Chem. Phys.* **1993**, *98* (7), 5648–5652. <https://doi.org/10.1063/1.464913>.

- (18) Stephens, P. J.; Devlin, F. J.; Chabalowski, C. F.; Frisch, M. J. Ab Initio Calculation of Vibrational Absorption and Circular Dichroism Spectra Using Density Functional Force Fields. *J. Phys. Chem.* **1994**, *98* (45), 11623–11627. <https://doi.org/10.1021/j100096a001>.
- (19) Lee, C.; Yang, W.; Parr, R. G. Development of the Colle-Salvetti Correlation-Energy Formula into a Functional of the Electron Density. *Phys. Rev. B* **1988**, *37* (2), 785–789. <https://doi.org/10.1103/PhysRevB.37.785>.
- (20) Hertwig, R. H.; Koch, W. On the Parameterization of the Local Correlation Functional. What Is Becke-3-LYP? *Chemical Physics Letters* **1997**, *268* (5), 345–351. [https://doi.org/10.1016/S0009-2614\(97\)00207-8](https://doi.org/10.1016/S0009-2614(97)00207-8).
- (21) Dunning, Thom. H.; Hay, P. J. Gaussian Basis Sets for Molecular Calculations. In *Methods of Electronic Structure Theory*; Schaefer, H. F., Ed.; Springer US: Boston, MA, 1977; pp 1–27. [https://doi.org/10.1007/978-1-4757-0887-5\\_1](https://doi.org/10.1007/978-1-4757-0887-5_1).
- (22) Hay, P. J.; Wadt, W. R. Ab Initio Effective Core Potentials for Molecular Calculations. Potentials for the Transition Metal Atoms Sc to Hg. *J. Chem. Phys.* **1985**, *82* (1), 270–283. <https://doi.org/10.1063/1.448799>.
- (23) Hay, P. J.; Wadt, W. R. Ab Initio Effective Core Potentials for Molecular Calculations. Potentials for K to Au Including the Outermost Core Orbitals. *J. Chem. Phys.* **1985**, *82* (1), 299–310. <https://doi.org/10.1063/1.448975>.
- (24) Hehre, W. J.; Ditchfield, R.; Pople, J. A. Self—Consistent Molecular Orbital Methods. XII. Further Extensions of Gaussian—Type Basis Sets for Use in Molecular Orbital Studies of Organic Molecules. *J. Chem. Phys.* **1972**, *56* (5), 2257–2261. <https://doi.org/10.1063/1.1677527>.
- (25) Hariharan, P. C.; Pople, J. A. Accuracy of AH<sub>n</sub> Equilibrium Geometries by Single Determinant Molecular Orbital Theory. *Molecular Physics* **1974**, *27* (1), 209–214. <https://doi.org/10.1080/00268977400100171>.
- (26) Francl, M. M.; Pietro, W. J.; Hehre, W. J.; Binkley, J. S.; Gordon, M. S.; DeFrees, D. J.; Pople, J. A. Self-consistent Molecular Orbital Methods. XXIII. A Polarization-type Basis Set for Second-row Elements. *J. Chem. Phys.* **1982**, *77* (7), 3654–3665. <https://doi.org/10.1063/1.444267>.
- (27) Rassolov, V. A.; Ratner, M. A.; Pople, J. A.; Redfern, P. C.; Curtiss, L. A. 6-31G\* Basis Set for Third-Row Atoms. *Journal of Computational Chemistry* **2001**, *22* (9), 976–984. <https://doi.org/10.1002/jcc.1058>.
- (28) Weigend, F.; Ahlrichs, R. Balanced Basis Sets of Split Valence, Triple Zeta Valence and Quadruple Zeta Valence Quality for H to Rn: Design and Assessment of Accuracy. *Phys. Chem. Chem. Phys.* **2005**, *7* (18), 3297–3305. <https://doi.org/10.1039/B508541A>.
